# Supplementary material for: [3,3]-Sigmatropic rearrangement mediated synthesis of chiral building blocks for the preparation of Gemini and its analogs
Source: Royal Society of Chemistry journal article supplement (doi:10.1039/c6ra08789b), 2016-01-01

**SUPPORTING INFORMATION FOR**

**[3,3]-sigmatropic rearrangement mediated synthesis of chiral building blocks for the preparation of Gemini and its analogs**

Gonzalo Pazos, Manuel Pérez, Zoila Gándara, Generosa Gómez\* and Yagamare Fall \*

*Departamento de Química Orgánica, Facultad de Química and Instituto de Investigación Biomédica (IBI), University of Vigo, Campus Marcosende, 36310 Vigo, Spain.*

*ggomez@uvigo.es; yagamare@uvigo.es*

**Table of Contents**

Index

Experimental details.....2-28

<sup>1</sup>H and <sup>13</sup>C NMR Spectra.....29-59

## Experimental procedure

**General:** Solvents were purified and dried by standard procedures before use. Melting points are uncorrected.  $^1\text{H}$  NMR and  $^{13}\text{C}$  NMR spectra were recorded with a Bruker ARX-400 spectrometer (400 MHz for  $^1\text{H}$  NMR, 100.61 MHz for  $^{13}\text{C}$  NMR) using TMS as internal standard (Chemical shifts in  $\delta$  values, J in Hz). Flash chromatography (FC) was performed on silica gel (Merck 60, 230-400 mesh); analytical TLC was performed on plates precoated with silica gel (Merck 60 F254, 0.25mm); mass spectra (FAB, EI) were recorded using FISIONS VG and electron spray ionization (ESI-MS) spectroscopy was recorded using Bruker FTMS APEXIII. Melting points were obtained in open capillary tubes and are not corrected. Optical rotations were obtained using a Jasco P-2000 polarimeter. IR spectra were recorded with a JASCO FT/I(R)-6100 spectrophotometer.

### Preparation of (E)-2-((4S,7aS)-4-(tert-butyldimethylsilyloxy)-7a-methyloctahydro-1H-inden-1-ylidene)ethanol (7)

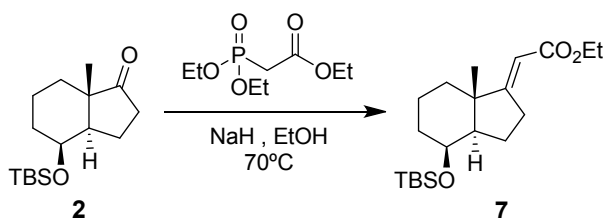

To a solution of ketone **2** (3 g, 11 mmol) and ethyl 2-(diethoxyphosphoryl)acetate (11.8 mL, 56 mmol) was added NaH (60%, 4.5 g, 113 mmol) in EtOH (70 mL). The reaction mixture was heated at 70 °C for 16 h. Brine and EtOAc were then added and the mixture extracted with  $\text{CH}_2\text{Cl}_2$  (2x100 mL). The organic layers were dried over  $\text{Na}_2\text{SO}_4$ , filtered and evaporated. The residue was chromatographed on silica gel using 1% EtOAc/Hexane as eluent, affording ester **7** (3.7 g, 94%) as a colorless liquid.

### Preparation of (E)-2-((4S,7aS)-4-(tert-butyldimethylsilyloxy)-7a-methyloctahydro-1H-inden-1-ylidene)ethanol (8)

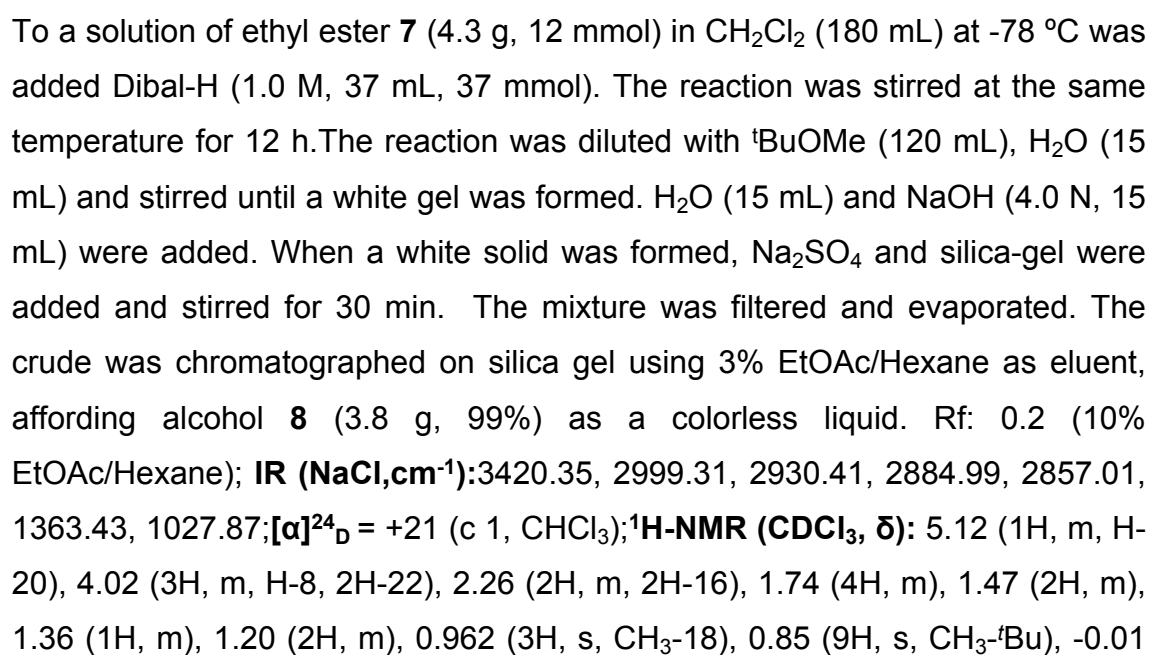

(3H, s, CH<sub>3</sub>-Si), -0.02 (3H, s, CH<sub>3</sub>-Si); **<sup>13</sup>C-NMR (CDCl<sub>3</sub>, δ)**:155.9 (C-17), 114.5 (C-20), 69.1 (CH-8), 59.8 (CH<sub>2</sub>-22), 50.9 (CH-14), 43.4 (C-13), 36.5 (CH<sub>2</sub>), 34.6 (CH<sub>2</sub>), 25.7 (CH<sub>3</sub>-<sup>t</sup>Bu), 25.2 (CH<sub>2</sub>), 23.3 (CH<sub>2</sub>), 21.4 (CH<sub>3</sub>-18), 17.9 (C-<sup>t</sup>Bu), 17.5 (CH<sub>2</sub>), -4.9 (CH<sub>3</sub>-Si), -5.3 (CH<sub>3</sub>-Si); **MS (FAB<sup>+</sup>) [m/z, (%)]**:310 (M<sup>+</sup>, 29), 309 (M<sup>+</sup>-1, 100), 209 (32), 185 (25); **HRMS (FAB<sup>+</sup>)** calcd for C<sub>18</sub>H<sub>33</sub>O<sub>2</sub>Si 309.2325, found 309.2323.

**Preparation of tert-butyl((E)-2-((4S,7aS)-4-(tert-butyldimethylsilyloxy)-7a-methyl octahydro-1H-inden-1-ylidene)ethoxy)dimethylsilane (9)**

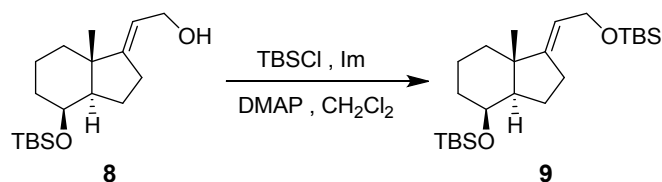

To a solution of allylic alcohol **8** (2.0 g, 6.4 mmol) in CH<sub>2</sub>Cl<sub>2</sub> (15 mL) were added Imidazole (820 mg, 12 mmol), DMPA (80 mg, 0.6 mmol) and TBSCl (1.07 g, 7.09 mmol). The mixture was stirred for 10 min. H<sub>2</sub>O (15 mL) was added and the product extracted with CH<sub>2</sub>Cl<sub>2</sub> (3x10 mL). The combined organic phases were washed with brine (2 x 20 mL), dried, filtered and evaporated to give a residue which was chromatographed on silica gel using 5% EtOAc/Hexane as eluent, affording compound **9** (2.4 g, 87%) as a colorless liquid; R<sub>f</sub>: 0.75 (10% EtOAc/Hexane); **IR (NaCl, cm<sup>-1</sup>)**:2998.75, 2930.29, 2885.23, 2860.10, 1363.52; **[α]<sub>D</sub><sup>22</sup>**=+22.4 (c 2.8, CHCl<sub>3</sub>); **<sup>1</sup>H-NMR (CDCl<sub>3</sub>, δ)**:5.07 (1H, m, H-20), 4.13 (3H, m, H-8, 2H-22), 2.25 (2H, m, H-16), 1.79 (4H, m), 1.50 (2H, m), 1.38 (1H, m), 1.23 (2H, m), 0.99 (3H, s, CH<sub>3</sub>-18), 0.89 (9H, s, CH<sub>3</sub>-<sup>t</sup>Bu), 0.88 (9H, s, CH<sub>3</sub>-<sup>t</sup>Bu), 0.05 (6H, s, CH<sub>3</sub>-Si), 0.02 (3H, s, CH<sub>3</sub>-Si), 0.015 (3H, s, CH<sub>3</sub>-Si); **<sup>13</sup>C-NMR (CDCl<sub>3</sub>, δ)**:153.4 (C-17), 115.6 (CH-20), 69.3 (CH-8), 61.5 (CH<sub>2</sub>-22), 51.4 (CH-14), 43.4 (C-13), 36.9 (CH<sub>2</sub>), 35.1 (CH<sub>2</sub>), 26.4 (CH<sub>3</sub>-<sup>t</sup>Bu), 26.1 (CH<sub>3</sub>-<sup>t</sup>Bu), 25.3 (CH<sub>2</sub>), 23.9 (CH<sub>2</sub>), 21.8 (CH<sub>3</sub>-18), 18.4 (C-<sup>t</sup>Bu), 18.0 (C-<sup>t</sup>Bu), 17.9 (CH<sub>2</sub>), -4.4 (CH<sub>3</sub>-Si), -4.5 (CH<sub>3</sub>-Si), -4.5 (CH<sub>3</sub>-Si), -4.7 (CH<sub>3</sub>-Si); **MS (FAB<sup>+</sup>) [m/z, (%)]**:424.27 (M<sup>+</sup>+1, 16), 423.27 (M<sup>+</sup>, 11), 367 (16), 293 (53), 291 (44), 235 (17), 171 (18); **HRMS (FAB<sup>+</sup>)** calcd for C<sub>24</sub>H<sub>48</sub>O<sub>2</sub>Si<sub>2</sub> 424.3134, found 424.3193.

**Preparation of (2R,4S,7aS,Z)-4-(tert-butyldimethylsilyloxy)-1-(2-(tert-butyl dimethylsilyloxy)ethylidene)-7a-methyloctahydro-1H-inden-2-ol (3)**

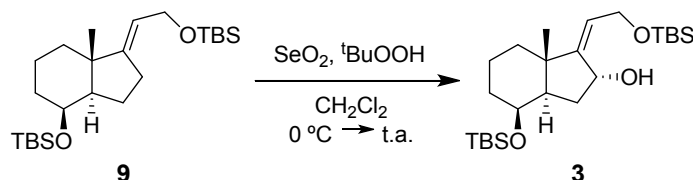

To a suspension of SeO<sub>2</sub> (42 mg, 0.38 mmol) in CH<sub>2</sub>Cl<sub>2</sub> (6 mL) was added a 70% aqueous solution of <sup>t</sup>BuOOH (208 μL, 1.5 mmol) at 0 °C and the mixture stirred for 1h. Then, a solution of compound **9** (324 mg, 0.76mmol) in CH<sub>2</sub>Cl<sub>2</sub> (5 mL) was added and stirred at r.t. for 24 h. NaOH (1.0 N, 20 mL) was added and the product extracted with CH<sub>2</sub>Cl<sub>2</sub> (3 x 20 mL). The combined organic phases were dried, filtered and evaporated to give a residue which was chromatographed on silica gel using 2% EtOAc/Hexane as eluent, affording compound **3** (300 mg, 90%) as a colorless liquid; R<sub>f</sub>: 0.37 (10% EtOAc/Hexane); **IR (NaCl, cm<sup>-1</sup>):** 3375.84, 2998.92, 2931.33, 2885.25, 2861.28, 1251.28; **[α]<sup>21</sup><sub>D</sub>** = -4.3 (c 1.4, CHCl<sub>3</sub>); **<sup>1</sup>H-NMR (CDCl<sub>3</sub>, δ):** 5.26 (1H, t, J=5.2 Hz, H-20), 4.80 (1H, d, J=6.54 Hz, H-16), 4.26 (1H, dd, J = 13.5, J = 5.7 Hz, H-22), 4.21 (1H, dd, J = 13.5, J= 6.1 Hz, H-22), 4.10 (1H, br s, H-8), 3.64 (1H, br s, OH), 1.99 (1H, dt, J = 13.2, J = 6.7 Hz), 1.75 (4H, m), 1.46 (3H, m), 1.26 (1H, m), 0.97 (3H, s, CH<sub>3</sub>-18), 0.89 (9H, s, CH<sub>3</sub>-<sup>t</sup>Bu), 0.86 (9H, s, CH<sub>3</sub>-<sup>t</sup>Bu), 0.096 (3H, s, CH<sub>3</sub>-Si), 0.082 (3H, s, CH<sub>3</sub>-Si), 0.005 (3H, s, CH<sub>3</sub>-Si), 0.001 (3H, s, CH<sub>3</sub>-Si); **<sup>13</sup>C-NMR (CDCl<sub>3</sub>, δ):** 160.3 (CH-17), 117.5 (CH-20), 69.9 (CH-8), 69.1 (CH-16), 61.2 (CH<sub>2</sub>-22), 47.9 (CH-14), 44.6 (C-13), 37.0 (CH<sub>2</sub>), 34.4 (CH<sub>2</sub>), 34.0 (CH<sub>2</sub>), 25.8 (CH<sub>3</sub>-<sup>t</sup>Bu), 25.7 (CH<sub>3</sub>-<sup>t</sup>Bu), 23.0 (CH<sub>3</sub>-18), 18.2 (C-<sup>t</sup>Bu), 17.9 (C-<sup>t</sup>Bu), 17.5 (CH<sub>2</sub>), -4.8 (CH<sub>3</sub>-Si), -5.1 (CH<sub>3</sub>-Si), -5.2 (CH<sub>3</sub>-Si), -5.3 (CH<sub>3</sub>-Si); **MS (FAB<sup>+</sup>) [m/z, (%):** 440.29 (M<sup>+</sup>, 12), 439.29 (M<sup>+</sup>-1, 9), 424 (49), 423 (100, M<sup>+</sup>-OH), 309 (51), 291 (55), 289 (23), 251 (32), 177 (37); **HRMS (FAB<sup>+</sup>)** calcd for C<sub>24</sub>H<sub>48</sub>O<sub>3</sub>Si<sub>2</sub> 440.3105, found 440.3111.



**Preparation of tert-butyl((Z)-2-((2R,3aR,4S,7aS)-4-((tert-butylidimethylsilyl)oxy)-7a-methyl-2-(vinylloxy)octahydro-1H-inden-1-ylidene)ethoxy)dimethylsilane (**10**)**

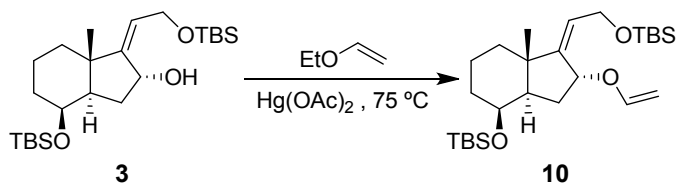

To a solution of allylic alcohol **3** (65 mg, 0.14 mmol) in ethyl vinyl ether (10 mL) was added  $\text{Hg}(\text{OAc})_2$  (15 mg, 0.048 mmol) and then the mixture was stirred at 75 °C for 2d in a sealed tube. The solvent was evaporated and the crude was chromatographed on silica gel using 1% EtOAc/Hexane as eluent, affording **10** (58 mg, 85%) as a colorless liquid and recovering part of the starting material **101** (10 mg, 15%); Rf: 0.72 (10% EtOAc/Hexane); IR (NaCl,  $\text{cm}^{-1}$ ): 2951.82, 2930.85, 2884.95, 2861.28, 1648.25, 975.49;  $[\alpha]^{22}_{\text{D}} = -30$  (c 1,  $\text{CHCl}_3$ );  $^1\text{H-NMR}$  ( $\text{CDCl}_3$ ,  $\delta$ ): 6.36 (1H, dd,  $J=14.3$ , 6.8 Hz, H-1'), 5.36 (1H, ddd,  $J=7.6$  Hz,  $J=4.2$  Hz,  $J=1.8$  Hz, H-20), 4.82 (1H, d,  $J=6.1$  Hz, H-16), 4.29 (1H, dd,  $J=13.6$  Hz,  $J=4.2$  Hz, H-22), 4.24 (1H, dd,  $J=14.3$ ,  $J=1.7$  Hz, H-2'), 4.16 (1H, dd,  $J=13.6$  Hz,  $J=7.9$  Hz, H-22), 4.09 (1H, br s, H-8), 4.06 (1H, dd,  $J=6.8$ ,  $J=1.7$  Hz, H-2'), 1.97 (1H, dt,  $J=14.9$ ,  $J=6.4$  Hz), 1.83 (2H, m), 1.73 (1H, m), 1.61 (2H, m), 1.55-1.24 (3H, m), 1.02 (3H, s,  $\text{CH}_3$ -18), 0.90 (9H, s,  $\text{CH}_3$ - $^t\text{Bu}$ ), 0.89 (9H, s,  $\text{CH}_3$ - $^t\text{Bu}$ ), 0.06 (6H, s,  $\text{CH}_3$ -Si), 0.03 (3H, s,  $\text{CH}_3$ -Si), 0.02 (3H, s,  $\text{CH}_3$ -Si);  $^{13}\text{C-NMR}$  ( $\text{CDCl}_3$ ,  $\delta$ ): 151.6 (C-17), 150.2 (CH-1'), 123.2 (CH-20), 88.4 (CH<sub>2</sub>-2'), 76.8 (CH-16), 68.9 (CH-8), 61.2 (CH<sub>2</sub>-22), 48.7 (CH-14), 43.5 (C-13), 36.8 (CH<sub>2</sub>), 34.4 (CH<sub>2</sub>), 31.3 (CH<sub>2</sub>), 26.0 (CH<sub>3</sub>- $^t\text{Bu}$ ), 25.8 (CH<sub>3</sub>- $^t\text{Bu}$ ), 22.9 (CH<sub>3</sub>-18), 18.4 (C- $^t\text{Bu}$ ), 17.9 (C- $^t\text{Bu}$ ), 17.5 (CH<sub>2</sub>), -4.8 (CH<sub>3</sub>-Si), -4.9 (CH<sub>3</sub>-Si), -5.0 (CH<sub>3</sub>-Si), -5.1 (CH<sub>3</sub>-Si); MS (ESI) [ $m/z$ , (%): 489 ( $\text{M}^+ + \text{Na}$ , 33), 426 ( $\text{M}^+ - \text{OCHCH}_2$ , 100), 291 (20); HRMS (ESI) calcd for  $\text{C}_{26}\text{H}_{50}\text{NaO}_3\text{Si}_2$ , 489.3190, found 489.3189.

**Preparation of (S)-4-((tert-butyldimethylsilyl)oxy)-3-((3aS,7S,7aR)-7-((tert-butyldimethylsilyl)oxy)-3a-methyl-3a,4,5,6,7,7a-hexahydro-1H-inden-3-yl)butanal (11)**

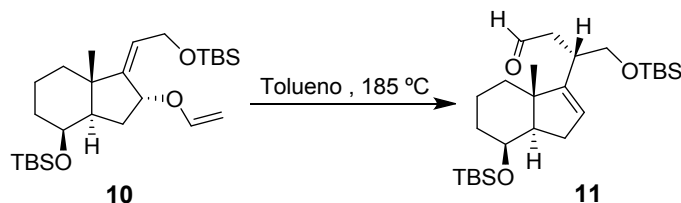

A solution of compound **10** (50 mg, 0.11 mmol) in toluene (1 mL) was heated at 185 °C for 1h in a sealed tube. The solvent was evaporated and the crude was chromatographed on silica gel using 1% EtOAc/Hexane as eluent, affording **11** (45 mg, 90%) as a colorless liquid. Rf: 0.52 (10% EtOAc/Hexane); **IR (NaCl, cm<sup>-1</sup>):** 2951.75, 2930.99, 2884.95, 2862.38, 1723.67, 1315.01; **[α]<sub>D</sub><sup>25</sup>:** +30 (c 1.8, CHCl<sub>3</sub>); **<sup>1</sup>H-NMR (CDCl<sub>3</sub>, δ):** 9.62 (1H, t, J=2.26 Hz, CHO), 5.36 (1H, s, H-16), 4.05 (1H, s, H-8), 3.66 (1H, 1H, dd, J = 9.7, J = 3.9 Hz, H-21), 3.22 (1H, t, J = 9.3 Hz, H-21), 2.75 (1H, m, H-20), 2.68 (1H, dd, J = 6.7, J = 2.3 Hz, H-22), 2.41 (1H, ddd, J = 15.33, J = 7.36, J = 2.51 Hz, H-22), 2.20 (1H, t, J = 13.2 Hz), 1.85 (2H, m), 1.75 (1H, d, J = 12.15 Hz), 1.67 (1H, d, J = 13.2 Hz), 1.58 (1H, dd, J = 11.02, J = 6.22 Hz), 1.45 (2H, m), 1.28 (1H, dt, J = 12.7, J = 3.1 Hz), 1.00 (3H, s, CH<sub>3</sub>-18), 0.85 (9H, s, CH<sub>3</sub>-<sup>t</sup>Bu), 0.84 (9H, s, CH<sub>3</sub>-<sup>t</sup>Bu), -0.007 (12H, s, CH<sub>3</sub>-Si); **<sup>13</sup>C-NMR (CDCl<sub>3</sub>, δ):** 202.9 (C=O), 154.2 (C-17), 124.3 (CH-16), 68.8 (CH-8), 66.9 (CH<sub>2</sub>-21), 54.4 (CH-14), 47.4 (CH<sub>2</sub>), 46.8 (C-13), 35.3 (CH<sub>2</sub>), 35.2 (CH-20), 34.4 (CH<sub>2</sub>), 31.1 (CH<sub>2</sub>), 25.8 (CH<sub>3</sub>-<sup>t</sup>Bu), 25.7 (CH<sub>3</sub>-<sup>t</sup>Bu), 19.3 (CH<sub>3</sub>-18), 18.2 (C-<sup>t</sup>Bu), 17.9 (C-<sup>t</sup>Bu), 17.8 (CH<sub>2</sub>), -4.8 (CH<sub>3</sub>-Si), -5.2 (CH<sub>3</sub>-Si), -5.4 (CH<sub>3</sub>-Si), -5.42 (CH<sub>3</sub>-Si); **MS (ESI) [m/z, (%):** 467 (M<sup>+</sup>+1, 33), 466 (M<sup>+</sup>, 9), 465 (M<sup>+</sup>-1, 100), 337 (29), 209 (18); **HRMS (ESI)** calcd for C<sub>26</sub>H<sub>49</sub>O<sub>3</sub>Si<sub>2</sub> 465.3214, found 465.3214.



**Preparation of (3S)-methyl 4-(tert-butyldimethylsilyloxy)-3-((4S,7aR)-4-(tert-butyldimethylsilyloxy)-7a-methyloctahydro-1H-inden-1-yl)butanoate (12)**

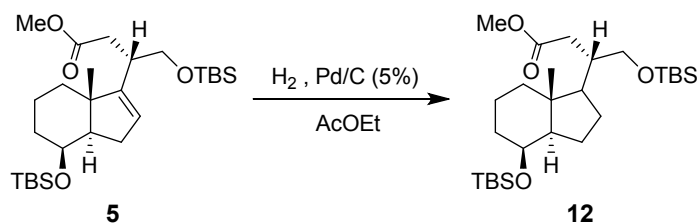

To a solution of compound **5** (6.9 g, 13.8 mmol) in EtOAc (165 mL) was added Pd/C (5%) (826 mg) and the mixture was stirred for 13 h under atmosphere of H<sub>2</sub>. The mixture was filtered through celite and the filtrate concentrated under vacuo to give pure **12** (6.8 g, 98%) as a colourless liquid. R<sub>f</sub>: 0.71 (10% EtOAc/Hexane); **IR (NaCl, cm<sup>-1</sup>)**: 2952.01, 2929.82, 2883.54, 2857.02, 1740.92, 1252.54, 1089.1; **[α]<sub>D</sub><sup>24</sup>** = +20.4 (c 2.4, CHCl<sub>3</sub>); **<sup>1</sup>H-NMR (CDCl<sub>3</sub>, δ)**: 3.98 (1H, br s, H-8), 3.62 (3H, s, CH<sub>3</sub>-OMe), 3.60 (1H, dd, J = 9.9 Hz, J = 3.3 Hz, H-21), 3.51 (1H, dd, J = 9.9, J = 5.6 Hz, H-21), 2.56 (1H, dd, J = 15.8 Hz, J = 3.6 Hz, H-22), 2.38 (1H, dd, J = 15.8 Hz, J = 9.1 Hz, H-22), 1.93 (1H, m), 1.79 (3H, m), 1.66 (1H, m), 1.55 (1H, m), 1.44-1.21 (6H, m), 1.12 (1H, m), 0.94 (3H, s, CH<sub>3</sub>-18), 0.88 (9H, s, CH<sub>3</sub>-<sup>t</sup>Bu), 0.87 (9H, s, CH<sub>3</sub>-<sup>t</sup>Bu), -0.001 (9H, s, CH<sub>3</sub>-Si), -0.01 (3H, s, CH<sub>3</sub>-Si); **<sup>13</sup>C-NMR (CDCl<sub>3</sub>, δ)**: 173.8 (C=O), 69.2 (CH-8), 64.1 (CH<sub>2</sub>-21), 52.7 (CH-17), 51.1 (CH<sub>3</sub>-OMe), 50.5 (CH-14), 41.8 (C-13), 40.4 (CH<sub>2</sub>), 39.2 (CH-20), 34.6 (CH<sub>2</sub>), 34.3 (CH<sub>2</sub>), 26.2 (CH<sub>2</sub>), 25.9 (CH<sub>3</sub>-<sup>t</sup>Bu), 25.8 (CH<sub>3</sub>-<sup>t</sup>Bu), 22.8 (CH<sub>2</sub>), 18.3 (C-<sup>t</sup>Bu), 18.0 (C-<sup>t</sup>Bu), 17.6 (CH<sub>2</sub>), 14.1 (CH<sub>3</sub>-18), -4.8 (CH<sub>3</sub>-Si), -5.2 (CH<sub>3</sub>-Si), -5.60 (CH<sub>3</sub>-Si), 5.61 (CH<sub>3</sub>-Si); **MS (ESI) [m/z, (%)]**: 499 (M<sup>+</sup>+1, 100), 358 (25); **HRMS (ESI)** calcd for C<sub>27</sub>H<sub>55</sub>O<sub>4</sub>Si<sub>2</sub>, 499.6590, found 499.6588.

**Preparation of (3S)-4-(tert-butyldimethylsilyloxy)-3-((4S,7aR)-4-(tert-butyldimethylsilyloxy)-7a-methyloctahydro-1H-inden-1-yl)butanal (**18**) and (3S)-4-(tert-butyldimethylsilyloxy)-3-((4S,7aR)-4-(tert-butyldimethylsilyloxy)-7a-methyloctahydro-1H-inden-1-yl)butan-1-ol (**13**)**

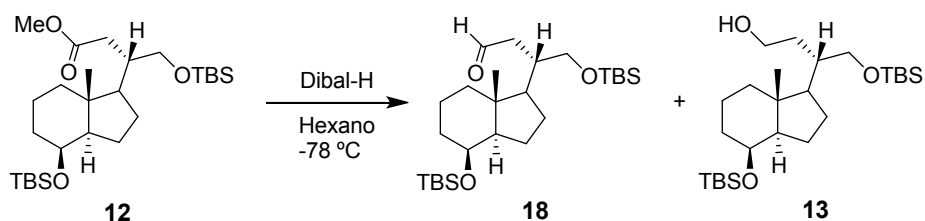

To a solution of ester **12** (650 mg, 1.31 mmol) in  $\text{CH}_2\text{Cl}_2$  (50 mL) at  $-78^\circ\text{C}$  was added Dibal-H (2.62 mL of a 1 M solution hexane, 2.62 mmol). The reaction was stirred at the same temperature for 30 min. Then, The reaction was diluted with  $t\text{BuOMe}$  (7.91 mL), and  $\text{H}_2\text{O}$  (0.98 mL) and the mixture stirred until a white gel was formed.  $\text{H}_2\text{O}$  (0.98 mL) and  $\text{NaOH}$  (4.0 N, 0.98 mL) were added. When the white solid appeared,  $\text{Na}_2\text{SO}_4$  was added and the solvent removed under reduced pressure. The residue was chromatographed on silica gel using 5% EtOAc/Hexane as eluent, affording aldehyde **18** (125 mg, 20%) and alcohol **13** (450 mg, 73%).

Compound **18**. Colorless liquid. Rf: 0.71 (10% EtOAc/Hexane); IR ( $\text{NaCl}$ ,  $\text{cm}^{-1}$ ): 2952.97, 2929.82, 2883.54, 2857.02, 1726.94, 1471.94, 853.50;  $[\alpha]^{22}_{\text{D}} = +23.6$  (c 1.7,  $\text{CHCl}_3$ );  $^1\text{H-NMR}$  ( $\text{CDCl}_3$ ,  $\delta$ ): 9.73 (1H, d,  $J = 3.4$  Hz, CHO), 3.99 (1H, br s, CH-8), 3.67 (1H, dd,  $J = 9.6$  Hz,  $J = 3.7$  Hz, H-21), 3.40 (1H, dd,  $J = 9.6$  Hz,  $J = 7.3$  Hz, H-21), 2.57 (1H, m, H-22), 2.38 (1H, ddd,  $J = 16.4$  Hz,  $J = 9.0$  Hz,  $J = 3.4$  Hz, H-22), 2.09 (1H, m), 1.37-1.53 (5H, m), 1.43-1.20 (6H, m), 1.13 (1H, t,  $J = 12.5$  Hz), 0.95 (3H, s,  $\text{CH}_3$ -18), 0.87 (9H, s,  $\text{CH}_3$ - $t\text{Bu}$ ), 0.85 (9H, s,  $\text{CH}_3$ - $t\text{Bu}$ ), 0.011 (3H, s,  $\text{CH}_3$ -Si), -0.001 (6H, s,  $\text{CH}_3$ -Si), 0.014 (3H, s,  $\text{CH}_3$ -Si);  $^{13}\text{C-NMR}$  ( $\text{CDCl}_3$ ,  $\delta$ ): 202.8 (C=O), 69.1 (CH-8), 65.6 ( $\text{CH}_2$ -21), 52.7 (CH-14), 50.8 (CH-17), 45.9 ( $\text{CH}_2$ ), 42.1 (C-13), 40.6 ( $\text{CH}_2$ ), 39.1 (CH-20), 34.2 ( $\text{CH}_2$ ), 26.6 ( $\text{CH}_2$ ), 25.8 ( $\text{CH}_3$ - $t\text{Bu}$ ), 25.8 ( $\text{CH}_3$ - $t\text{Bu}$ ), 22.9 ( $\text{CH}_2$ ), 18.2 (C- $t\text{Bu}$ ), 17.9 (C- $t\text{Bu}$ ), 17.5 ( $\text{CH}_2$ ), 14.2 ( $\text{CH}_3$ -18), -4.8 ( $\text{CH}_3$ -Si), -5.2 ( $\text{CH}_3$ -Si), -5.6 ( $\text{CH}_3$ -Si), -5.6 ( $\text{CH}_3$ -

Si); **MS (ESI) [m/z, (%)]**: 467 ( $M^+ - 1$ , 100); **HRMS (ESI)** calcd for  $C_{26}H_{51}O_3Si_2$  467.3367, found 467.3366

Compound **13**. Colorless liquid. Rf: 0.37 (10% EtOAc/Hexane); **IR (NaCl,  $cm^{-1}$ )**: 3361.81, 2953.45, 2929.34, 2883.54, 2857.02, 1253.02, 835.50;  **$[\alpha]^{23}_D$**  = +24.56 (c 1.32,  $CHCl_3$ );  **$^1H$ -NMR ( $CDCl_3$ ,  $\delta$ )**: 4.00 (1H, br s, CH-8), 3.70 (2H, dd,  $J = 10.0$  Hz,  $J = 1.9$  Hz, H-21, OH), 3.61 (1H, m, H-23), 3.45 (1H, dd,  $J = 10.0$ ,  $J = 6.6$  Hz, H-21), 3.21 (1H, t,  $J = 5.4$  Hz, H-23), 1.89 (2H, m), 1.76 (2H, m), 1.70-1.49 (4H, m), 1.40-1.20 (6H, m), 1.13 (1H, m), 0.94 (3H, s,  $CH_3$ -18), 0.90 (9H, s,  $CH_3$ - $t$ Bu), 0.88 (9H, s,  $CH_3$ - $t$ Bu), 0.07 (6H, s,  $CH_3$ -Si), 0.01 (3H, s,  $CH_3$ -Si), 0.001 (3H, s,  $CH_3$ -Si);  **$^{13}C$ -NMR ( $CDCl_3$ ,  $\delta$ )**: 69.3 (CH-8), 66.1 ( $CH_2$ -21), 60.8 ( $CH_2$ -23), 52.8 (CH-14), 51.1 (CH-17), 42.1 (C-13), 41.3 (CH-20), 40.6 ( $CH_2$ ), 34.9 ( $CH_2$ ), 34.3 ( $CH_2$ ), 26.8 ( $CH_2$ ), 25.8 ( $CH_3$ - $t$ Bu), 25.8 ( $CH_3$ - $t$ Bu), 22.9 ( $CH_2$ ), 18.2 (C- $t$ Bu), 17.9 (C- $t$ Bu), 17.6 ( $CH_2$ ), 13.9 ( $CH_3$ -18), -4.8 ( $CH_3$ -Si), -5.2 ( $CH_3$ -Si), -5.4 ( $CH_3$ -Si), -5.5 ( $CH_3$ -Si); **MS (ESI) [m/z, (%)]**: 471 ( $M^+ + 1$ , 100), 472 ( $M^+ + 2$ , 25); **HRMS (ESI)** calcd for  $C_{26}H_{55}O_3Si_2$  471.3684, found 471.3674.

**(2S)-2-((3aR,4S,7aR)-4-((tert-butyldimethylsilyl)oxy)-7a-methyloctahydro-1H-inden-1-yl)butane-1,4-diol (14)**

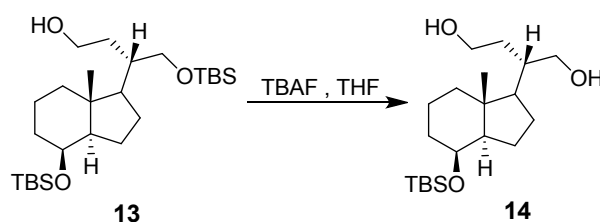

To a solution of **13** (35 mg, 0.074 mmol) in THF (1 mL) was added TBAF (150  $\mu$ L of a 1 M solution in THF, 0.15 mmol) and the mixture was stirred at room temperature for 12 h. Then the solvent was removed under reduced pressure and the crude was chromatographed on silica gel using 50% EtOAc/Hexane as eluent, giving compound **14** (21 mg, 96%) as a white solid. m.p: 115  $^{\circ}C$ ; Rf: 0.1 (50% EtOAc/Hexane); **IR (NaCl,  $cm^{-1}$ )**: 3277.43, 2997.80, 2936.09, 2857.51,

1251.58, 1021.12;  $[\alpha]^{24}_D = +21.14$  (c 1.37,  $\text{CHCl}_3$ );  $^1\text{H-NMR}$  ( $\text{CDCl}_3$ ,  $\delta$ ): 4.00 (1H, s ancho, H-8), 3.78 (1H, m, H-23), 3.71 (1H, dd,  $J = 11.1$  Hz, 2.6 Hz, H-21), 3.66 (1H, m, H-23), 3.52 (1H, dd,  $J = 11.1$  Hz, 5.9 Hz, H-21), 3.11 (2H, br s, OH), 1.93-1.72 (4H, m), 1.72-1.46 (4H, m), 1.46-1.20 (6H, m), 1.14 (1H, m), 0.92 (3H, s,  $\text{CH}_3$ -18), 0.88 (9H, s,  $\text{CH}_3$ - $^t\text{Bu}$ ), 0.01 (3H, s,  $\text{CH}_3$ -Si), -0.01 (3H, s,  $\text{CH}_3$ -Si);  $^{13}\text{C-NMR}$  ( $\text{CDCl}_3$ ,  $\delta$ ): 69.2 (CH-8), 65.1 ( $\text{CH}_2$ -21), 60.5 ( $\text{CH}_2$ -23), 52.8 (CH-14), 50.4 (CH-17), 42.1 (C-13), 41.1 (CH-20), 40.7 ( $\text{CH}_2$ ), 34.3 ( $\text{CH}_2$ ), 34.0 ( $\text{CH}_2$ ), 26.7 ( $\text{CH}_2$ ), 25.8 ( $\text{CH}_3$ - $^t\text{Bu}$ ), 22.8 ( $\text{CH}_2$ ), 18.0 (C- $^t\text{Bu}$ ), 17.6 ( $\text{CH}_2$ ), 13.9 ( $\text{CH}_3$ -18), -4.8 ( $\text{CH}_3$ -Si), -5.2 ( $\text{CH}_3$ -Si); **MS (ESI)  $[m/z, (\%)]$** : 357 ( $\text{M}^+ + 1$ , 100), 356 ( $\text{M}^+$ , 24), 339 ( $\text{M}^+ - \text{OH}$ , 36); **HRMS (ESI)** calcd for  $\text{C}_{20}\text{H}_{41}\text{O}_3\text{Si}$  357.2747, found 357.2745.

**Preparation of (Z)-2-((4S,7aS)-4-(tert-butyldimethylsilyloxy)-7a-methyloctahydro-1H-inden-1-ylidene)ethanol(15)**

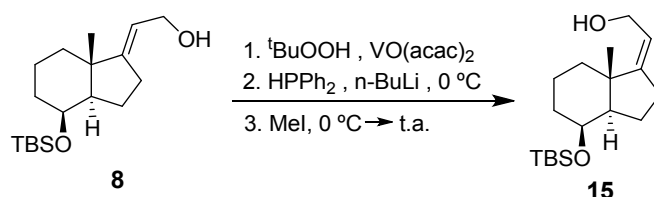

To a solution of allylic alcohol **8** (1.8 g, 5.8 mmol) in toluene (20 mL) was added  $\text{VO(acac)}_2$  (catalytic) and  $^t\text{BuOOH}$  (1.16 mL of a 5.5 M solution in decane, 6.4 mmol) at  $-20^\circ\text{C}$  and the mixture was stirred at the same temperature for 24 h. A saturated aqueous solution of  $\text{NaHCO}_3$  (20 mL) was added and the product extracted with  $\text{CH}_2\text{Cl}_2$  (2 x 30 mL). The combined organic layers were dried over  $\text{Na}_2\text{SO}_4$ , filtered and evaporated. The crude (2.5 g) was directly used in the next step.

To a solution of  $\text{HPPH}_2$  (2.6 mL, 15.1 mmol) in THF (15 mL) was added  $n\text{-BuLi}$  (2.5 M, 6.03 mL, 15.1 mmol) at  $0^\circ\text{C}$ . After 4 h at  $0^\circ\text{C}$ , a solution of the above obtained crude (2.5 g) in THF (15 mL) was added and stirring continued for 1 h. Finally, MeI (1.7 mL) was added and the mixture stirred for 4 h at room temperature.  $\text{H}_2\text{O}$  (100 mL) was added and the product extracted with  $\text{Et}_2\text{O}$  (3 x

30 mL). The combined organic layers were dried over Na<sub>2</sub>SO<sub>4</sub>, filtered and evaporated. The crude was chromatographed on silica gel using 4% EtOAc/Hexane as eluent, providing compound **15** (981 mg, 55%) as a colorless liquid. Rf: 0.28 (30% EtOAc/Hexane); IR (NaCl, cm<sup>-1</sup>): 3416.91, 2999.96, 2931.83, 2884.24, 2856.99, 1362.58, 1027.89; [α]<sup>25</sup><sub>D</sub> = -3.14 (c 0.92, CHCl<sub>3</sub>); <sup>1</sup>H-NMR (CDCl<sub>3</sub>, δ): 5.23 (1H, tt, J = 7.2 Hz, J = 1.9 Hz, H-20), 4.29 (1H, dd, J = 12.2 Hz, J = 7.3 Hz, H-22), 4.15 (1H, dd, J = 12.2 Hz, J = 7.3 Hz, H-22), 4.08 (1H, br s, H-8), 2.45 (1H, dd, J = 17.0 Hz, J = 9.1 Hz, H-16), 2.23 (1H, dd, J = 17.0 Hz, J = 9.1 Hz, H-16), 1.87 (1H, m), 1.70 (3H, m), 1.58-1.33 (5H, m), 1.12 (3H, s, CH<sub>3</sub>-18), 0.89 (9H, s, CH<sub>3</sub>-<sup>t</sup>Bu), 0.03 (3H, s, CH<sub>3</sub>-Si), 0.02 (3H, s, CH<sub>3</sub>-Si); <sup>13</sup>C-NMR (CDCl<sub>3</sub>, δ): 154.6 (C-17), 117.9 (CH-20), 69.5 (CH-8), 58.6 (CH<sub>2</sub>-22), 52.3 (CH-14), 44.5 (C-13), 38.1 (CH<sub>2</sub>), 34.2 (CH<sub>2</sub>), 30.5 (CH<sub>2</sub>), 25.7 (CH<sub>3</sub>-<sup>t</sup>Bu), 23.5 (CH<sub>2</sub>), 20.4 (CH<sub>3</sub>-18), 17.9 (CH<sub>2</sub>), 17.8 (C-<sup>t</sup>Bu), -4.8 (CH<sub>3</sub>-Si), -5.1 (CH<sub>3</sub>-Si); MS (ESI) [m/z, (%): 310 (M<sup>+</sup>, 20), 309 (M<sup>+</sup>-1, 100), 209 (21); HRMS (ESI) calcd for C<sub>18</sub>H<sub>33</sub>O<sub>2</sub>Si 309.2332, found 309.2329.

**Preparation of tert-butyl((Z)-2-((4S,7aS)-4-(tert-butyl dimethylsilyloxy)-7a-methyl octahydro-1H-inden-1-ylidene)ethoxy)dimethylsilane(9)**

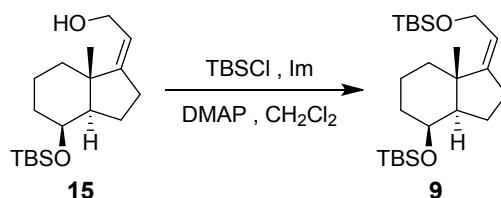

**$\delta$** :5.13 (1H, tt,  $J = 6.2$  Hz,  $J = 1.8$  Hz, H-20), 4.36 (1H, dd,  $J = 12.7$  Hz,  $J = 6.0$  Hz, H-22), 4.27 (1H, dd,  $J = 12.7$  Hz,  $J = 6.0$  Hz, H-22), 4.09 (1H, br s, H-8), 2.45 (1H, dd,  $J = 17.0$  Hz,  $J = 9.8$  Hz, H-16), 2.21 (1H, m, H-16), 2.07 (1H, m), 1.88 (1H, m), 1.71 (2H, m), 1.57-1.35 (5H, m), 1.13 (3H, s, CH<sub>3</sub>-18), 0.93 (9H, s, CH<sub>3</sub>-<sup>t</sup>Bu), 0.91 (9H, s, CH<sub>3</sub>-<sup>t</sup>Bu), 0.09 (6H, s, CH<sub>3</sub>-Si), 0.043 (3H, s, CH<sub>3</sub>-Si), 0.039 (3H, s, CH<sub>3</sub>-Si);  **$^{13}\text{C-NMR}$  (CDCl<sub>3</sub>,  $\delta$ )**:151.3 (C-17), 119.2 (CH-20), 69.6 (CH-8), 59.5 (CH<sub>2</sub>-22), 52.3 (CH-14), 44.3 (C-13), 37.8 (CH<sub>2</sub>), 34.2 (CH<sub>2</sub>), 30.3 (CH<sub>2</sub>), 26.1 (CH<sub>3</sub>-<sup>t</sup>Bu), 25.8 (CH<sub>3</sub>-<sup>t</sup>Bu), 23.6 (CH<sub>2</sub>), 19.8 (CH<sub>3</sub>-13), 18.4 (C-<sup>t</sup>Bu), 18.1 (C-<sup>t</sup>Bu), 17.8 (CH<sub>2</sub>), -4.8 (CH<sub>3</sub>-Si), -4.9 (CH<sub>3</sub>-Si), -5.0 (CH<sub>3</sub>-Si), -5.1 (CH<sub>3</sub>-Si); **MS (FAB<sup>+</sup>) [ $m/z$ , (%)]**:424.27 (M<sup>+</sup>, 26), 423.27 (M<sup>+</sup>-1, 15), 367 (26), 293 (43), 291 (39), 235 (19), 171 (28); **HRMS (FAB<sup>+</sup>)** calcd for C<sub>24</sub>H<sub>48</sub>O<sub>2</sub>Si<sub>2</sub> 424.3132, found 424.3188.

**Preparation of (2R,4S,7aS,E)-4-(tert-butyldimethylsilyloxy)-1-(2-(tert-butyl dimethylsilyloxy)ethylidene)-7a-methyloctahydro-1H-inden-2-ol (4)**

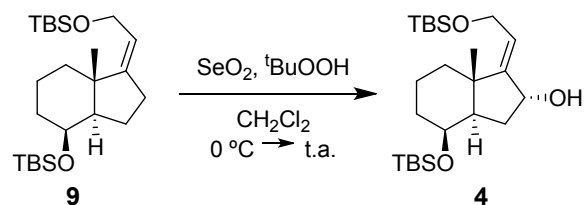

To a suspension of SeO<sub>2</sub> (159 mg, 1.4 mmol) in CH<sub>2</sub>Cl<sub>2</sub> (8 mL) was added a 70% aqueous solution of <sup>t</sup>BuOOH (786  $\mu\text{L}$ , 5.7 mmol) at 0 °C and the mixture stirred for 1h. Then, a solution of compound **9** (1.2 g, 2.9 mmol) in CH<sub>2</sub>Cl<sub>2</sub> (13 mL) was added and stirred at r.t. for 24 h. NaOH (1.0 N, 30 mL) was added and the product extracted with CH<sub>2</sub>Cl<sub>2</sub> (3 x 30 mL). The combined organic phases were dried, filtered and evaporated to give a residue which was chromatographed on silica gel using 1% EtOAc/Hexane as eluent, affording compound **4** (993 mg, 79%) as a colorless liquid; R<sub>f</sub>: 0.32 (10% EtOAc/Hexane); **IR (NaCl, cm<sup>-1</sup>)**: 3391.14, 2998.68, 2931.98, 2884.45, 2861.57, 1250.73;  **$[\alpha]^{23}_{\text{D}}$**  = -19.2 (c 1.9, CHCl<sub>3</sub>);  **$^1\text{H-NMR}$  (CDCl<sub>3</sub>,  $\delta$ )**:5.53 (1H, m, H-20), 4.50 (1H, d,  $J = 6.3$  Hz, H-16), 4.36 (2H, d,  $J = 5.7$  Hz, 2H-22), 4.10 (1H, br s, ), 2.05-1.35 (9H, m), 1.10 (3H, s,



**Preparation of (3S)-4-(tert-butyldimethylsilyloxy)-3-((4S,7aR)-4-(tert-butyldimethylsilyloxy)-7a-methyloctahydro-1H-inden-1-yl)butanal (18)**

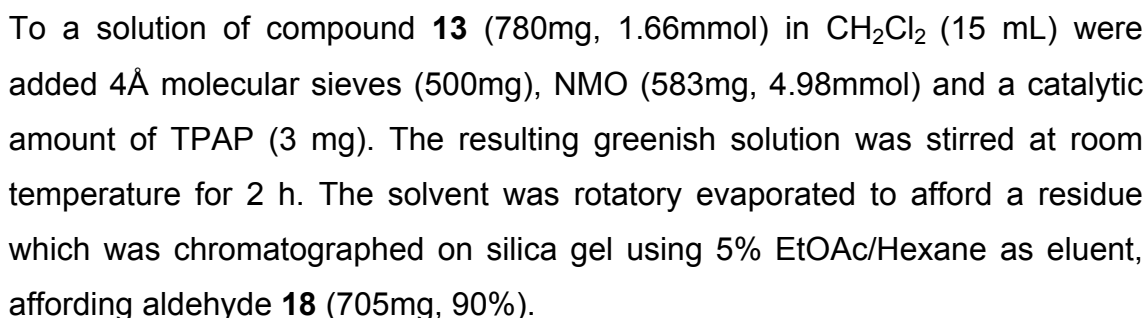

**Preparation of (5R,E)-ethyl 6-(tert-butyldimethylsilyloxy)-5-((3aS,7S)-7-(tert-butyldimethylsilyloxy)-3a-methyl-3a,4,5,6,7,7a-hexahydro-1H-inden-3-yl)hex-2-enoate (19)**

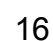



To a solution of aldehyde **18** (700 mg, 1.49 mmol) in THF (15 mL), was added  $\text{PPh}_3\text{CHCO}_2\text{Et}$  (1g, 2.99 mmol). The reaction was heated for 2 days at rt. The solvent was evaporated and the residue was chromatographed on silica gel using 5% EtOAc/Hexane as eluent, affording alkene **19** (720mg, 90%) as a colorless liquid. Rf: 0.74 (10% EtOAc/Hexane); IR (NaCl,  $\text{cm}^{-1}$ ): 2953.45, 2929.82, 2884.50, 2857.02, 1723.57, 1653.18, 1254.95, 853.99;  $[\alpha]^{24}_{\text{D}} = +10.6$  (c 1.4,  $\text{CHCl}_3$ );  $^1\text{H-NMR}$  ( $\text{CDCl}_3$ ,  $\delta$ ): 6.98 (1H, ddd,  $J = 15.3$  Hz,  $J = 7.8$  Hz,  $J = 7.3$  Hz, CH-23), 5.81 (1H, d,  $J = 15.3$  Hz, CH-24), 4.17 (2H, q,  $J = 7.1$  Hz,  $\text{OCH}_2\text{CH}_3$ ), 3.99 (1H, br s, CH-8), 3.55 (1H, dd,  $J = 10.0$  Hz,  $J = 3.2$  Hz, H-21), 3.40 (1H, dd,  $J = 10.0$  Hz,  $J = 5.8$  Hz, H-21), 2.49 (1H, m, H-22), 2.31 (1H, m, H-22), 1.90-1.47 (6H, m), 1.42-1.25 (7H, m), 1.28 (3H, t,  $J = 7.1$  Hz,  $\text{OCH}_2\text{CH}_3$ ), 0.93 (3H, s,  $\text{CH}_3$ -18), 0.89 (9H, s,  $\text{CH}_3$ - $^t\text{Bu}$ ), 0.88 (9H, s,  $\text{CH}_3$ - $^t\text{Bu}$ ), 0.01 (9H, s,  $\text{CH}_3$ -Si), -0.01 (3H, s,  $\text{CH}_3$ -Si);  $^{13}\text{C-NMR}$  ( $\text{CDCl}_3$ ,  $\delta$ ): 166.6 (C=O), 148.3 (CH-23), 122.4 (CH-24), 69.3 (CH-8), 63.2 ( $\text{CH}_2$ -21), 59.9 ( $\text{OCH}_2\text{CH}_3$ ), 52.7 (CH-14), 50.3 (CH-17), 42.1 (C-13), 41.9 (CH-20), 40.6 ( $\text{CH}_2$ ), 34.3 ( $\text{CH}_2$ ), 32.4 ( $\text{CH}_2$ ), 26.3 ( $\text{CH}_2$ ), 25.9 ( $\text{CH}_3$ - $^t\text{Bu}$ ), 25.8 ( $\text{CH}_3$ - $^t\text{Bu}$ ), 22.8 ( $\text{CH}_2$ ), 18.2 (C- $^t\text{Bu}$ ), 18.0 (C- $^t\text{Bu}$ ), 17.6 ( $\text{CH}_2$ ), 14.2 ( $\text{CH}_3$ -18), 14.1 ( $\text{OCH}_2\text{CH}_3$ ), -4.8 ( $\text{CH}_3$ -Si), -5.2 ( $\text{CH}_3$ -Si), -5.5 ( $\text{CH}_3$ -Si), -5.6 ( $\text{CH}_3$ -Si); MS (ESI) [ $m/z$ , (%): 539 ( $\text{M}^+ + 1$ , 40), 407 ( $\text{M}^+ - \text{OTBS}$ , 45), 215 (100), 200 (96); HRMS (FAB $^+$ ) calcd for  $\text{C}_{30}\text{H}_{59}\text{O}_4\text{Si}_2$  539.3946, found 539.3946.

**Preparation of (5S)-ethyl 6-((tert-butyldimethylsilyl)oxy)-5-((3aR,4S,7aR)-4-((tert-butyldimethylsilyl)oxy)-7a-methyloctahydro-1H-inden-1-yl)hexanoate (20) and (5S)-ethyl 5-((3aR,4S,7aR)-4-((tert-butyldimethylsilyl)oxy)-7a-methyloctahydro-1H-inden-1-yl)-6-hydroxyhexanoate (21)**

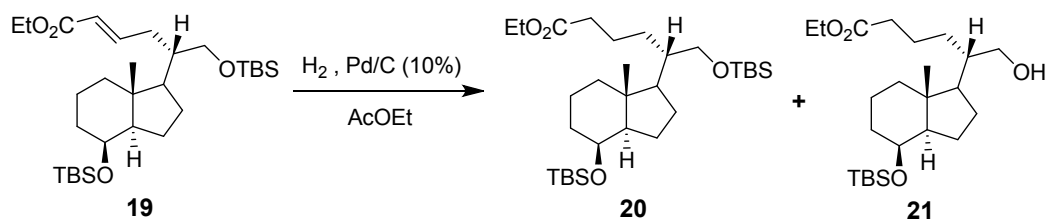

To a solution of compound **19** (652 mg, 1.21 mmol) in AcOEt (15 mL) was added Pd/C (10%) (36 mg) and the mixture was stirred for 20h under atmosphere of H<sub>2</sub>. The mixture was filtered through celite and the filtrate concentrated under vacuo. The crude was chromatographed on silica gel using 5% EtOAc/Hexane as eluent, affording compound **20** (280 mg, 43%) and alcohol **21** (250 mg, 48%).

Compound **20**. Colorless liquid. Rf: 0.74 (10% EtOAc/Hexane); IR (NaCl, cm<sup>-1</sup>): 2953.39, 2929.82, 2884.49, 2856.99, 1723.64, 1253.94, 853.98; [α]<sup>24</sup><sub>D</sub> = +19.8 (c 1.4, CHCl<sub>3</sub>); <sup>1</sup>H-NMR (CDCl<sub>3</sub>, δ): 4.11 (2H, q, J = 7.1 Hz, OCH<sub>2</sub>CH<sub>3</sub>), 3.99 (1H, s ancho, CH-8), 3.61 (1H, m, H-21), 3.42 (1H, dd, J = 10.0 Hz, J = 5.7 Hz, H-21), 2.25 (2H, t, J = 7.5 Hz, H-24), 1.91-1.12 (17H, m), 1.24 (3H, t, J = 7.2 Hz, OCH<sub>2</sub>CH<sub>3</sub>), 0.90 (3H, s, CH<sub>3</sub>-18), 0.88 (9H, s, CH<sub>3</sub>-<sup>t</sup>Bu), 0.87 (9H, s, CH<sub>3</sub>-<sup>t</sup>Bu), 0.01 (6H, s, CH<sub>3</sub>-Si), -0.001 (3H, s, CH<sub>3</sub>-Si), -0.02 (3H, s, CH<sub>3</sub>-Si); <sup>13</sup>C-NMR (CDCl<sub>3</sub>, δ): 173.9 (C=O), 69.4 (CH-8), 63.1 (CH<sub>2</sub>-21), 60.1 (OCH<sub>2</sub>CH<sub>3</sub>), 52.8 (CH-14), 50.6 (CH-17), 42.0 (C-13), 41.7 (CH-20), 40.4 (CH<sub>2</sub>), 34.9 (CH<sub>2</sub>), 34.4 (CH<sub>2</sub>), 28.8 (CH<sub>2</sub>), 26.3 (CH<sub>2</sub>), 25.9 (CH<sub>3</sub>-<sup>t</sup>Bu), 25.8 (CH<sub>3</sub>-<sup>t</sup>Bu), 22.9 (CH<sub>2</sub>), 21.6 (CH<sub>2</sub>), 18.2 (C-<sup>t</sup>Bu), 18.0 (C-<sup>t</sup>Bu), 17.7 (CH<sub>2</sub>), 14.2 (CH<sub>3</sub>-18), 13.9 (OCH<sub>2</sub>CH<sub>3</sub>), -4.8 (CH<sub>3</sub>-Si), -5.2 (CH<sub>3</sub>-Si), -5.4 (CH<sub>3</sub>-Si), -5.5 (CH<sub>3</sub>-Si); MS (ESI) [m/z, (%]): 540 (M<sup>+</sup>, 100), 322 (49), 298 (38); HRMS (ESI) calcd for C<sub>30</sub>H<sub>60</sub>O<sub>4</sub>Si<sub>2</sub> 540.4029, found 540.4025.

Compound **21**. Colorless liquid. Rf: 0.40 (30% EtOAc/Hexane); IR (NaCl, cm<sup>-1</sup>): 3392.66, 2953.29, 2929.82, 2884.59, 2857.51, 1734.17, 1251.18; [α]<sup>24</sup><sub>D</sub> = +14.6 (c 0.6, CHCl<sub>3</sub>); <sup>1</sup>H-NMR (CDCl<sub>3</sub>, δ): 4.10 (2H, q, J = 7.1 Hz, OCH<sub>2</sub>CH<sub>3</sub>), 3.97 (1H, br s, CH-8), 3.68 (1H, dd, J = 11.1 Hz, J = 3.0 Hz, H-21), 3.50 (1H, dd, J = 11.1 Hz, J = 5.4 Hz, H-21), 2.28 (2H, t, J = 6.9 Hz, H-24), 2.02 (1H, m), 1.89-1.12 (16H, m), 1.23 (3H, t, J = 7.1 Hz, OCH<sub>2</sub>CH<sub>3</sub>), 0.89 (3H, s, CH<sub>3</sub>-18), 0.86 (9H, s, CH<sub>3</sub>-<sup>t</sup>Bu), -0.02 (3H, s, CH<sub>3</sub>-Si), -0.03 (3H, s, CH<sub>3</sub>-Si); <sup>13</sup>C-NMR (CDCl<sub>3</sub>, δ): 174.1 (C=O), 69.2 (CH-8), 62.9 (CH<sub>2</sub>-21), 60.3 (OCH<sub>2</sub>CH<sub>3</sub>), 52.8 (CH-14), 50.4 (CH-17), 42.1 (C-13), 41.6 (CH-20), 40.4 (CH<sub>2</sub>), 34.3 (CH<sub>2</sub>), 28.2 (CH<sub>2</sub>), 26.4 (CH<sub>2</sub>), 25.7 (CH<sub>3</sub>-<sup>t</sup>Bu), 22.8 (CH<sub>2</sub>), 20.8 (CH<sub>2</sub>), 17.9 (CH<sub>2</sub>), 17.6 (C-<sup>t</sup>Bu), 14.2 (CH<sub>3</sub>-18), 13.9 (OCH<sub>2</sub>CH<sub>3</sub>), -4.8 (CH<sub>3</sub>-Si), -5.2 (CH<sub>3</sub>-Si); MS (ESI) [m/z,

(%): 427 ( $M^{+}+1$ , 100), 409 ( $M^{+} - OH$ , 27), 277 (50), 215 (22); **HRMS (ESI)** calcd for  $C_{24}H_{47}O_4Si$  427.3226, found 427.3238.

### General method for the preparation of compound 22 and 23:

To a solution of ester **20** or **21** (0.50 mmol) in THF (5 mL) was added MeLi-LiBr (2.53 mmol of a 1.5 M solution in  $Et_2O$ ) at  $-78^{\circ}C$  and the mixture was stirred for 30 min. Then,  $H_2O$  (20 mL) was added and the product extracted with  $CH_2Cl_2$  (3x15 mL). The combined organic phases were dried, filtered and evaporated to give a residue which was chromatographed on silica gel using 15% EtOAc/Hexane as eluent.

### Preparation of (6S)-7-((tert-butyldimethylsilyl)oxy)-6-((3aR,4S,7aR)-4-((tert-butyldimethylsilyl)oxy)-7a-methyloctahydro-1H-inden-1-yl)-2-methylheptan-2-ol (**22**)

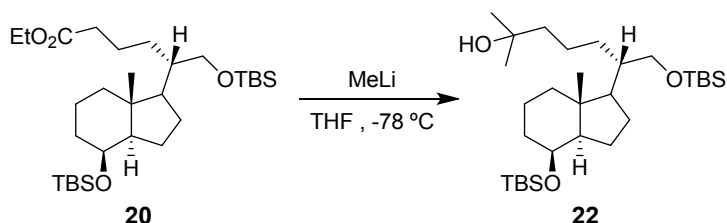

Compound **22**. Rf: 0.33 (10% AcOEt/Hexano); **IR (NaCl,  $cm^{-1}$ )**: 3392.17, 2953.93, 2929.34, 2884.02, 2857.02, 1252.54, 853.50.;  $[\alpha]^{24}_D = +13.8$  (c 2.6,  $CHCl_3$ );  **$^1H$ -NMR ( $CDCl_3$ ,  $\delta$ )**: 3.98 (1H, br s, CH-8), 3.61 (1H, dd,  $J = 9.9$  Hz,  $J = 2.8$  Hz, H-21), 3.42 (1H, dd,  $J = 9.9$  Hz,  $J = 5.1$  Hz, H-21), 1.89 (1H, m), 1.73 (3H, m), 1.58-1.15 (15H, m), 1.19 (6H, s,  $CH_3$ -26,  $CH_3$ -27), 0.90 (3H, s,  $CH_3$ -18), 0.88 (9H, s,  $CH_3$ - $t$ Bu), 0.87 (9H, s,  $CH_3$ - $t$ Bu), 0.01 (6H, s,  $CH_3$ -Si), -0.00 (3H, s,  $CH_3$ -Si), -0.02 (3H, s,  $CH_3$ -Si);  **$^{13}C$ -NMR ( $CDCl_3$ ,  $\delta$ )**: 71.1 (C-25), 69.4 (CH-8), 63.2 ( $CH_2$ -21), 52.9 (CH-14), 50.7 (CH-17), 44.6 ( $CH_2$ ), 42.1 (C-13), 41.9 (CH-20), 40.5 ( $CH_2$ ), 34.4 ( $CH_2$ ), 29.7 ( $CH_2$ ), 29.2 ( $CH_3$ -26 o  $CH_3$ -27), 29.1 ( $CH_3$ -26 o







(**CDCl<sub>3</sub>**,  $\delta$ ): 4.09 (2H, q, J=7.1 Hz, OCH<sub>2</sub>CH<sub>3</sub>), 3.96 (1H, br s, CH-8), 2.23 (2H, m, 2H-24), 1.86 (1H, m), 1.82-1.06 (22H, m), 1.23 (3H, t, J = 7.1Hz, OCH<sub>2</sub>CH<sub>3</sub>), 1.18 (6H, s, CH<sub>3</sub>-26, CH<sub>3</sub>-27), 0.87 (3H, s, CH<sub>3</sub>-18), 0.86 (9H, s, CH<sub>3</sub>-<sup>t</sup>Bu), -0.02 (3H, s, CH<sub>3</sub>-Si), -0.04 (3H, s, CH<sub>3</sub>-Si); **<sup>13</sup>C-NMR** (**CDCl<sub>3</sub>**,  $\delta$ ): 173.9 (C=O), 70.9 (C-25), 69.3 (CH-8), 60.1 (OCH<sub>2</sub>CH<sub>3</sub>), 52.9 (CH-17), 52.8 (CH-14), 44.3 (CH<sub>2</sub>), 42.1 (C-13), 40.3 (CH<sub>2</sub>), 38.4 (CH-20), 34.7 (CH<sub>2</sub>), 34.0 (CH<sub>2</sub>), 30.9 (CH<sub>2</sub>), 30.0 (CH<sub>2</sub>), 29.2 (CH<sub>3</sub>-26 o CH<sub>3</sub>-27), 29.1 (CH<sub>3</sub>-26 o CH<sub>3</sub>-27), 26.7 (CH<sub>2</sub>), 25.7 (CH<sub>3</sub>-<sup>t</sup>Bu), 22.8 (CH<sub>2</sub>), 20.7 (CH<sub>2</sub>), 19.7 (CH<sub>2</sub>), 17.9 (C-<sup>t</sup>Bu), 17.6 (CH<sub>2</sub>), 14.2 (CH<sub>3</sub>-18), 13.7 (OCH<sub>2</sub>CH<sub>3</sub>), -4.8 (CH<sub>3</sub>-Si), -5.2 (CH<sub>3</sub>-Si); **MS (ESI) [m/z, (%)]**: 519 (M<sup>+</sup> + Na, 75), 479 (72), 447 (100), 215 (83); **HRMS (ESI)** calcd for C<sub>29</sub>H<sub>56</sub>NaO<sub>4</sub>Si, 519.3840, found 519.3839.

**Preparation of 6-((3aR,4S,7aR)-4-((tert-butyldimethylsilyl)oxy)-7a-methyloctahydro-1H-inden-1-yl)-2,10-dimethylundecane-2,10-diol (26)**

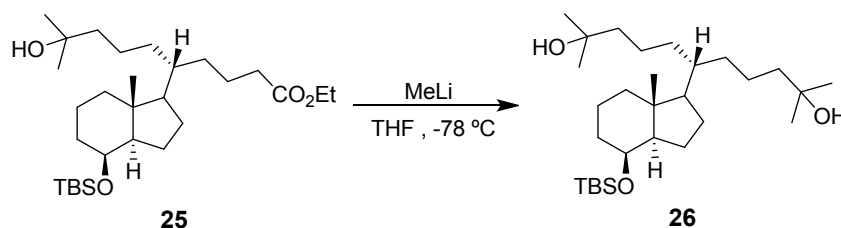

To a solution of ester **25** (140 mg, 0.28 mmol) in THF (3 mL) was added MeLi-LiBr (1.3 mL of a 1.5 M solution in Et<sub>2</sub>O, 1.97 mmol) at -78 °C and the mixture was stirred for 15 min. H<sub>2</sub>O (20 mL) was added and the product extracted with CH<sub>2</sub>Cl<sub>2</sub> (3 x 15 mL). The combined organic phases were dried, filtered and evaporated to give a residue which was chromatographed on silica gel using 30% EtOAc/Hexane as eluent, affording **26** (135mg, 99%) as a colorless liquid; Rf: 0.32 (50% EtOAc/Hexane); **IR (NaCl, cm<sup>-1</sup>)**: 3420.14, 2963.09, 2931.69, 2874.38, 1377.41; **[α]<sup>23</sup><sub>D</sub>** = +1.7 (c 0.5, CHCl<sub>3</sub>); **<sup>1</sup>H-NMR** (**CDCl<sub>3</sub>**,  $\delta$ ): 3.96 (1H, br s, CH-8), 1.86 (1H, m), 1.79-1.10 (24H, m), 1.18 (12H, s, CH<sub>3</sub>-26, CH<sub>3</sub>-27, CH<sub>3</sub>-4', CH<sub>3</sub>-5'), 0.88 (3H, s, CH<sub>3</sub>-18), 0.86 (9H, s, CH<sub>3</sub>-<sup>t</sup>Bu), -0.02 (3H, s, CH<sub>3</sub>-Si), -0.03 (3H, s, CH<sub>3</sub>-Si); **<sup>13</sup>C-NMR** (**CDCl<sub>3</sub>**,  $\delta$ ): 70.9 (C-25 ó C-3'), 69.4 (CH-8), 53.1 (CH-14 ó CH-17), 53.0 (CH-14 ó CH-17), 44.4 (CH<sub>2</sub>), 44.3 (CH<sub>2</sub>), 42.1 (C-13), 40.3 (CH<sub>2</sub>), 38.5 (CH-20), 34.4 (CH<sub>2</sub>), 31.2 (CH<sub>2</sub>), 31.1





**Preparation of (3aR,7aR)-1-(2,10-dihydroxy-2,10-dimethylundecan-6-yl)-7a-methylhexahydro-1H-inden-4(2H)-one (28)**

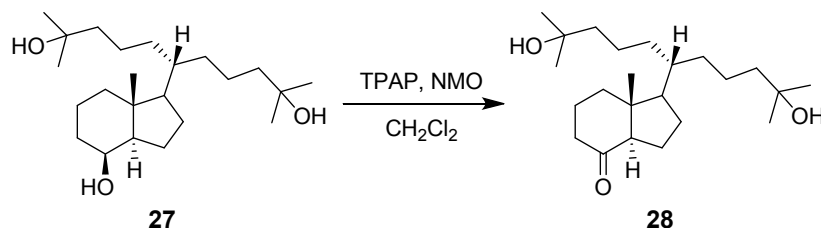

To a solution of compound **27** (58 mg, 0.16 mmol) in  $\text{CH}_2\text{Cl}_2$  (3 mL) were added 4Å molecular sieves (50mg), NMO (55 mg, 0.47 mmol) and a catalytic amount of TPAP (5 mg). The resulting greenish solution was stirred at room temperature for 12 h. The solvent was rotatory evaporated to afford a residue which was chromatographed on silica gel using 60% EtOAc/Hexane as eluent, affording ketone **28** (55 mg, 95%) as a colorless liquid. Rf: 0.52 (10% MeOH/ $\text{CH}_2\text{Cl}_2$ ); IR (NaCl,  $\text{cm}^{-1}$ ): 3398.29, 2960.20, 2874.86, 1725.78, 1457.92, 1248.68, 1042.34;  $[\alpha]_D^{24} = -9.0$  (c 1.3,  $\text{CHCl}_3$ );  $^1\text{H-NMR}$  ( $\text{CDCl}_3$ ,  $\delta$ ): 2.45 (1H, dd, J = 11.4Hz, J = 7.6 Hz, H-14), 2.24 (2H, m), 2.02 (2H, m), 1.96-1.23 (25H, m), 1.22 (6H, s,  $\text{CH}_3$ -26,  $\text{CH}_3$ -27 o  $\text{CH}_3$ -4',  $\text{CH}_3$ -5'), 1.21 (6H, s,  $\text{CH}_3$ -26,  $\text{CH}_3$ -27 o  $\text{CH}_3$ -4',  $\text{CH}_3$ -5'), 0.63 (3H, s,  $\text{CH}_3$ -18);  $^{13}\text{C-NMR}$  ( $\text{CDCl}_3$ ,  $\delta$ ): 212.1 (C=O), 70.8 (C-25 o C-3'), 61.8 (CH-14), 53.1 (CH-17), 49.9 (C-13), 44.3 ( $\text{CH}_2$ ), 44.2 ( $\text{CH}_2$ ), 40.8 ( $\text{CH}_2$ ), 38.8 (CH-20), 38.5 ( $\text{CH}_2$ ), 31.3 ( $\text{CH}_2$ ), 31.2 ( $\text{CH}_2$ ), 29.3 ( $\text{CH}_3$ -4' o  $\text{CH}_3$ -5'), 29.2 ( $\text{CH}_3$ -26 o  $\text{CH}_3$ -27), 29.1 ( $\text{CH}_3$ -26 o  $\text{CH}_3$ -27), 26.8 ( $\text{CH}_2$ ), 23.9 ( $\text{CH}_2$ ), 19.9 ( $\text{CH}_2$ ), 19.7 ( $\text{CH}_2$ ), 18.8 ( $\text{CH}_2$ ), 12.5 ( $\text{CH}_3$ -18); MS (ESI) [ $m/z$ , (%]): 389 ( $\text{M}^+ + \text{Na}$ , 32), 349 ( $\text{M}^+ - \text{OH}$ , 100), 331 (56), 215 (31); HRMS (ESI) calcd for  $\text{C}_{23}\text{H}_{42}\text{NaO}_3$ , 389.3026, found 389.3028.

**Preparation of (3aR,7aR)-7a-methyl-1-(2,2,4,4,12,12,14,14-octamethyl-3,13-dioxa-2,14-disilapentadecan-8-yl)hexahydro-1H-inden-4(2H)-one (16)**

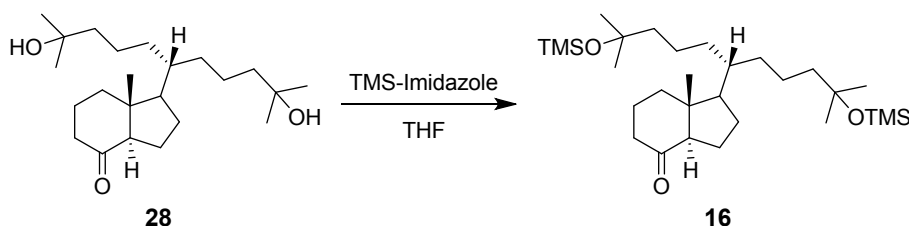

To a solution of compound **28** (39 mg, 0.11 mmol) in THF (2 mL) was added TMS-Imidazole (312  $\mu$ L, 2.13 mmol) and the solution was stirred at room temperature for 40 h. H<sub>2</sub>O (5 mL) was added and the product extracted with CH<sub>2</sub>Cl<sub>2</sub> (3 x 5 mL). The organic layer was dried over Na<sub>2</sub>SO<sub>4</sub>, filtered and evaporated. The crude was chromatographed on silica gel using 5% EtOAc/Hexane as eluent, affording **16** (49 mg, 91%) as a colorless liquid; R<sub>f</sub>: 0.66 (30% EtOAc/Hexane); IR (NaCl, cm<sup>-1</sup>): 2960.29, 2874.86, 1717.69, 1457.82, 1248.68, 1042.34, 852.50; [ $\alpha$ ]<sub>D</sub><sup>25</sup> = -6.2 (c 2.3, CHCl<sub>3</sub>); <sup>1</sup>H-NMR (CDCl<sub>3</sub>,  $\delta$ ): 2.45 (1H, dd, J = 11.4 Hz, J = 7.6 Hz, H-14), 2.24 (2H, m), 2.03 (2H, m), 1.95-1.22 (20H, m), 1.21 (6H, s, CH<sub>3</sub>-26, CH<sub>3</sub>-27 o CH<sub>3</sub>-4', CH<sub>3</sub>-5'), 1.20 (6H, s, CH<sub>3</sub>-26, CH<sub>3</sub>-27 o CH<sub>3</sub>-4', CH<sub>3</sub>-5'), 0.63 (3H, s, CH<sub>3</sub>-18), 0.10 (9H, s, CH<sub>3</sub>-Si), 0.10 (9H, s, CH<sub>3</sub>-Si); <sup>13</sup>C-NMR (CDCl<sub>3</sub>,  $\delta$ ): 212.1 (C=O), 73.9 (C-25 o C-3'), 73.9 (C-25 o C-3'), 61.9 (CH-14), 53.2 (CH-17), 49.9 (C-13), 45.3 (CH<sub>2</sub>), 45.3 (CH<sub>2</sub>), 40.9 (CH<sub>2</sub>), 39.0 (CH-20), 38.7 (CH<sub>2</sub>), 31.2 (CH<sub>2</sub>), 31.1 (CH<sub>2</sub>), 29.9 (CH<sub>3</sub>-4' o CH<sub>3</sub>-5'), 29.8 (CH<sub>3</sub>-26 o CH<sub>3</sub>-27), 29.7 (CH<sub>3</sub>-26 o CH<sub>3</sub>-27), 27.0 (CH<sub>2</sub>), 24.1 (CH<sub>2</sub>), 20.2 (CH<sub>2</sub>), 19.7 (CH<sub>2</sub>), 18.9 (CH<sub>2</sub>), 12.5 (CH<sub>3</sub>-18), 2.6 (CH<sub>3</sub>-Si); MS (ESI) [m/z, (%): 533 (M<sup>+</sup> + Na, 100), 511 (M<sup>+</sup> + 1, 36); HRMS (ESI) calcd for C<sub>29</sub>H<sub>58</sub>NaO<sub>3</sub>Si<sub>2</sub>, 533.3816, found 533.3814.

**Preparation of 8-((3aS,7aR,E)-4-((Z)-2-((3S,5R)-3,5-bis((tert-butyl)dimethylsilyl)oxy)-2-methylenecyclohexylidene)ethylidene)-7a-methyloctahydro-1H-inden-1-yl)-2,2,4,4,12,12,14,14-octamethyl-3,13-dioxo-2,14-disilapentadecane (29)**

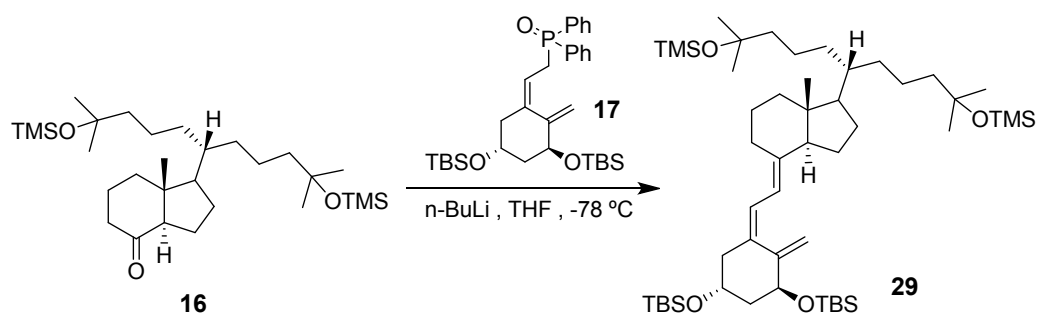

To a solution of phosphine oxide **17** (413 mg, 0.71 mmol) in THF (2 mL) was added dropwise *n*-BuLi (260  $\mu$ L of a 2.5 M solution in THF, 0.65 mmol) at -78 °C and the mixture was stirred for 30 min. A solution of ketone **16** (52 mg, 0.1 mmol) in THF (2 mL) was added at the same conditions and stirred for 1 h. A saturated aqueous solution of NH<sub>4</sub>Cl (5 mL) was added and the mixture was extracted with EtOAc (3x5 mL). The organic phase was dried over Na<sub>2</sub>SO<sub>4</sub> and the solvent removed under reduced pressure. The residue was chromatographed on silica gel using 2% EtOAc/Hexane as eluent, affording **29** (81 mg, 91%) as a colorless liquid; R<sub>f</sub>: 0.68 (10% EtOAc/Hexane); **IR (NaCl, cm<sup>-1</sup>):** 2961.20, 2875.86, 1684.32, 1634.85, 1495.56, 1265.34, 1085.32, 849.69; **[ $\alpha$ ]<sup>23</sup><sub>D</sub>** = -4.6 (c 0.9, CHCl<sub>3</sub>); **<sup>1</sup>H-NMR (CDCl<sub>3</sub>,  $\delta$ ):** 6.24 (1H, d, J = 11.2 Hz, H-6), 6.02 (1H, d, J = 11.2 Hz, H-7), 5.18 (1H, br s, H-19), 4.87 (1H, br s, H-19), 4.37 (1H, dd, J = 6.6 Hz, J = 3.5 Hz, H-1), 4.19 (1H, m, H-3), 2.83 (1H, m), 2.45 (1H, dd, J = 13.1 Hz, J = 3.5 Hz), 2.22 (1H, dd, J = 13.1 Hz, J = 7.4 Hz), 1.97 (2H, m), 1.82 (3H, m), 1.65 (2H, m), 1.58-1.21 (19H, m), 1.20 (12H, s, CH<sub>3</sub>-26, CH<sub>3</sub>-27, CH<sub>3</sub>-4', CH<sub>3</sub>-5'), 0.88 (18H, s, CH<sub>3</sub>-Si), 0.53 (3H, s, CH<sub>3</sub>-18), 0.10 (18H, s, CH<sub>3</sub>-Si), 0.06 (12H, s, CH<sub>3</sub>-Si); **<sup>13</sup>C-NMR (CDCl<sub>3</sub>,  $\delta$ ):** 148. (C-10), 141.1 (C-8), 134.9 (C-5), 123.2 (CH-6), 117.8 (CH-7), 111.2 (CH<sub>2</sub>-19), 74.1 (C-25), 74.0 (C-3'), 72.1 (CH-1), 67.5 (CH-3), 56.3 (CH-14), 53.0 (CH-17), 46.0 (CH<sub>2</sub>), 45.8 (C-13), 45.4 (CH<sub>2</sub>), 44.8 (CH<sub>2</sub>), 40.3 (CH<sub>2</sub>), 39.6 (CH-20), 31.4 (CH<sub>2</sub>), 31.2 (CH<sub>2</sub>), 29.9 (CH<sub>3</sub>-4' o CH<sub>3</sub>-5'), 29.9 (CH<sub>3</sub>-26 o CH<sub>3</sub>-27), 29.8 (CH<sub>3</sub>-26 o CH<sub>3</sub>-27), 28.9 (CH<sub>2</sub>), 27.2 (CH<sub>2</sub>), 25.8 (CH<sub>3</sub>-<sup>t</sup>Bu), 25.8 (CH<sub>3</sub>-<sup>t</sup>Bu), 23.5 (CH<sub>2</sub>), 22.0 (CH<sub>2</sub>), 20.3 (CH<sub>2</sub>), 19.7 (CH<sub>2</sub>), 18.2 (C-<sup>t</sup>Bu), 18.1 (C-<sup>t</sup>Bu), 12.0 (CH<sub>3</sub>-18), 2.6 (CH<sub>3</sub>-Si), -4.6 (CH<sub>3</sub>-Si), -4.6 (CH<sub>3</sub>-Si), -4.8 (CH<sub>3</sub>-Si), -5.1 (CH<sub>3</sub>-Si); **MS (ESI) [m/z, (%)]:** 874 (M<sup>+</sup>, 62), 873 (M<sup>+</sup> - 1, 100), 579 (36), 457 (22); **HRMS (ESI)** calcd for C<sub>50</sub>H<sub>97</sub>NaO<sub>4</sub>Si<sub>4</sub> 873.6458, found 873.6455.

**Preparation of (1R,3S,Z)-5-((E)-2-((3aS,7aR)-1-(2,10-dihydroxy-2,10-dimethylundecan-6-yl)-7a-methylhexahydro-1H-inden-4(2H)-ylidene)ethylidene)-4-methylenecyclohexane-1,3-diol (Gemini)**

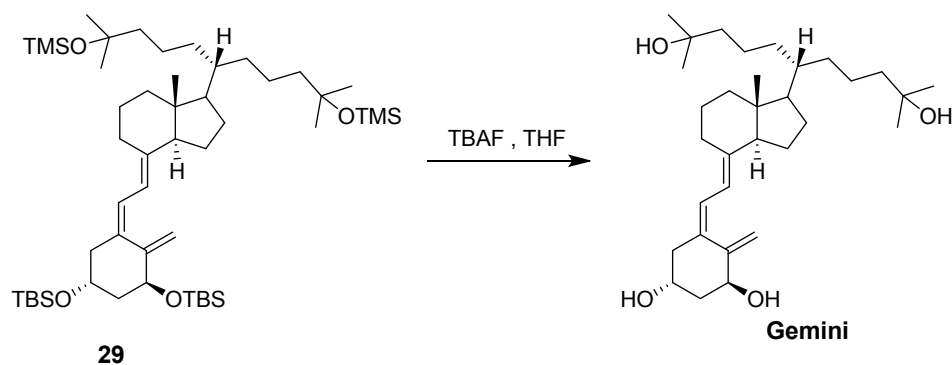

To a solution of **29** (70 mg, 0.079 mmol) in THF (4 mL) was added TBAF (1.6 mL of a 1 M solution in THF, 1.6 mmol) and the solution was stirred for 48 h. A saturated aqueous solution of  $\text{NH}_4\text{Cl}$  (5 mL) was added and the product extracted with EtOAc (2 x 5 mL). The organic phase was dried over  $\text{Na}_2\text{SO}_4$  and the residue was chromatographed on silica gel using 5% MeOH/  $\text{CH}_2\text{Cl}_2$  as eluent, affording **Gemini** (38 mg, 95%) as a white solid; m.p: 86 °C; Rf: 0.40 (AcOEt); **IR (NaCl,  $\text{cm}^{-1}$ )**: 3392.66, 2960.27, 2928.86, 2875.86, 1684.32, 1634.89, 1457.44;  **$[\alpha]^{24}_{\text{D}}$**  = +12.86 (c 1.26, EtOH);  **$^1\text{H-NMR}$  ( $\text{CDCl}_3$ ,  $\delta$ )**: 6.35 (1H, d, J = 11.2 Hz, H-6), 6.01 (1H, d, J = 11.2 Hz, H-7), 5.31 (1H, br s, H-19), 4.98 (1H, br s, H-19), 4.41 (1H, dd, J = 7.8 Hz, J = 4.2 Hz, H-1), 4.20 (1H, m, H-3), 2.81 (1H, dd, J = 12.0, 3.4 Hz), 2.57 (1H, dd, J = 13.4 Hz, J = 2.9 Hz), 2.30 (1H, dd, J = 13.4 Hz, J = 6.4 Hz), 2.05-1.73 (10H, m), 1.65 (2H, m), 1.58-1.21 (14H, m), 1.20 (12H, s,  $\text{CH}_3$ -26,  $\text{CH}_3$ -27,  $\text{CH}_3$ -4',  $\text{CH}_3$ -5'), 0.52 (3H, s,  $\text{CH}_3$ -18);  **$^{13}\text{C-NMR}$  ( $\text{CDCl}_3$ ,  $\delta$ )**: 147.6 (C-10), 142.9 (C-8), 133.1 (C-5), 124.8 (CH-6), 117.1 (CH-7), 111.7 ( $\text{CH}_2$ -19), 71.1 (CH-1), 70.6 (C-25 ò C-3'), 66.7 (CH-3), 56.2 (CH-14), 52.9 (CH-17), 45.9 (C-13), 45.1 ( $\text{CH}_2$ ), 44.4 ( $\text{CH}_2$ ), 44.3 ( $\text{CH}_2$ ), 42.7 ( $\text{CH}_2$ ), 40.1 ( $\text{CH}_2$ ), 39.4 (CH-20), 31.3 ( $\text{CH}_2$ ), 31.2 ( $\text{CH}_2$ ), 29.3 ( $\text{CH}_3$ -4' o  $\text{CH}_3$ -5'), 29.1 ( $\text{CH}_3$ -26 o  $\text{CH}_3$ -27), 29.1 ( $\text{CH}_3$ -26 o  $\text{CH}_3$ -27), 29.0 ( $\text{CH}_2$ ), 27.1 ( $\text{CH}_2$ ), 23.5 ( $\text{CH}_2$ ), 22.1 ( $\text{CH}_2$ ), 20.0 ( $\text{CH}_2$ ), 19.7 ( $\text{CH}_2$ ), 12.1 ( $\text{CH}_3$ -18); **MS (ESI) [ $m/z$ , (%)]**: 525 ( $\text{M}^+$  + Na, 100), 467 (52), 449 (25); **HRMS (ESI)** calcd for  $\text{C}_{32}\text{H}_{54}\text{NaO}_4$  525.3914, found 525.3910.

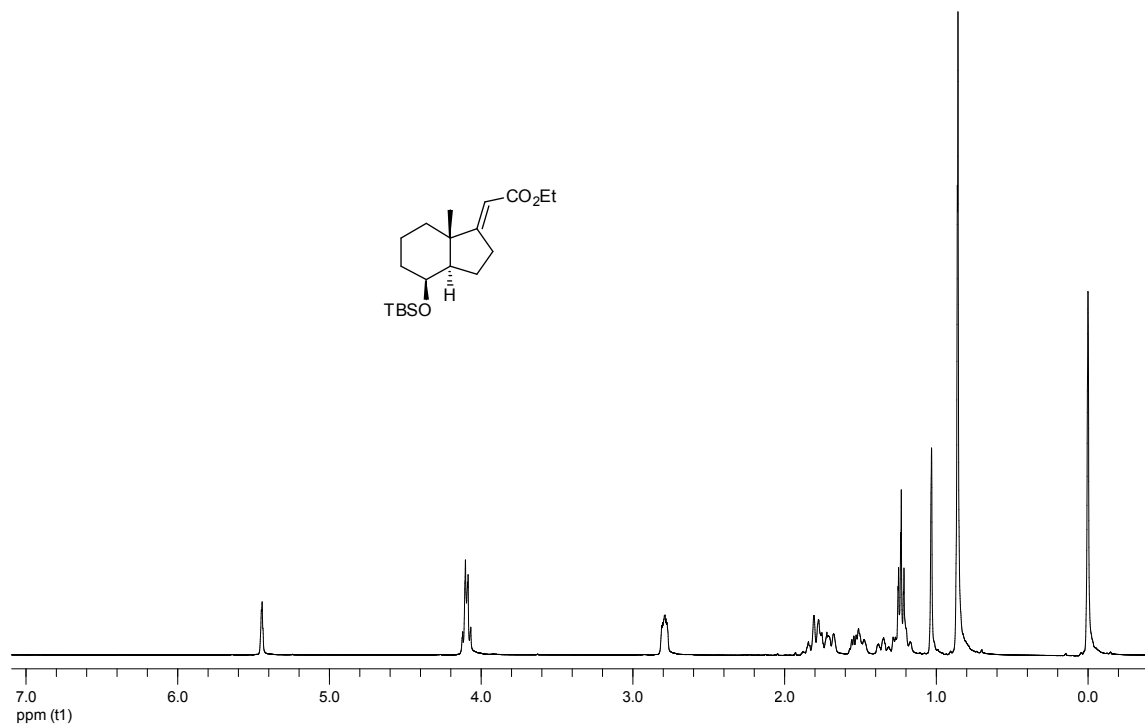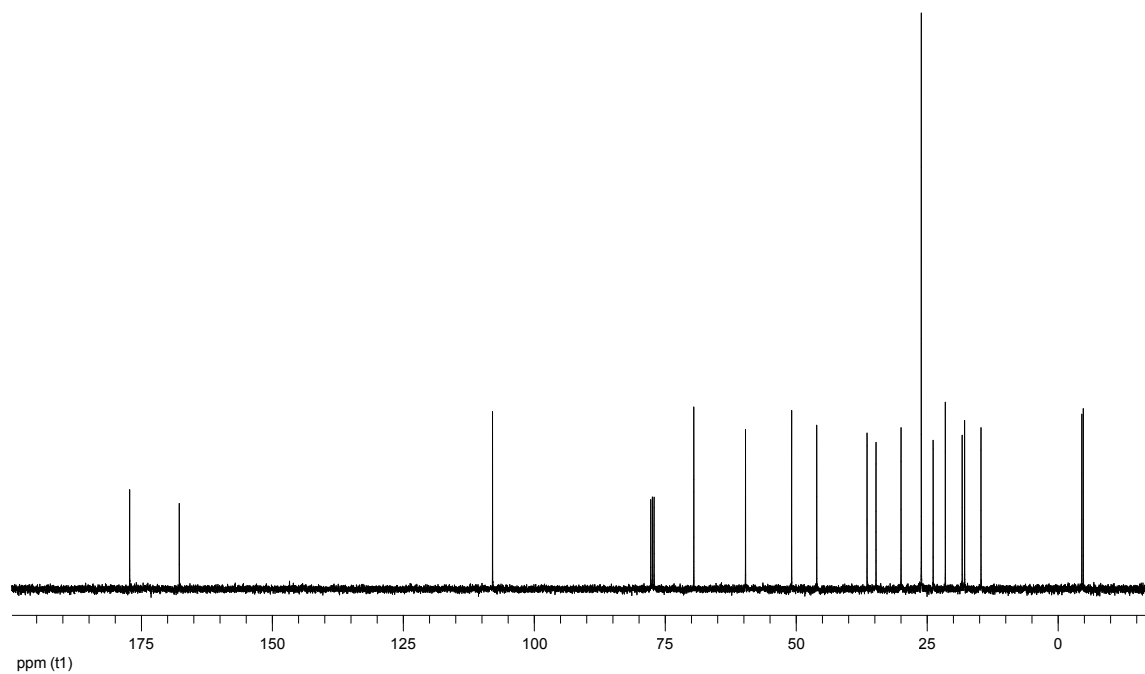

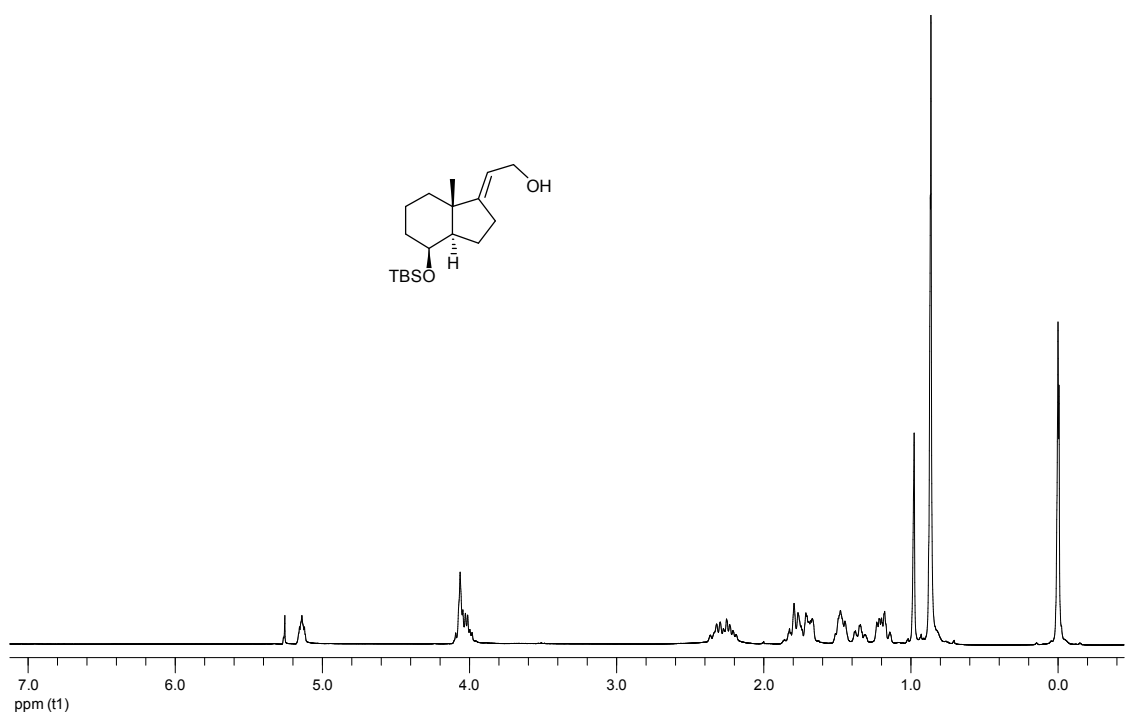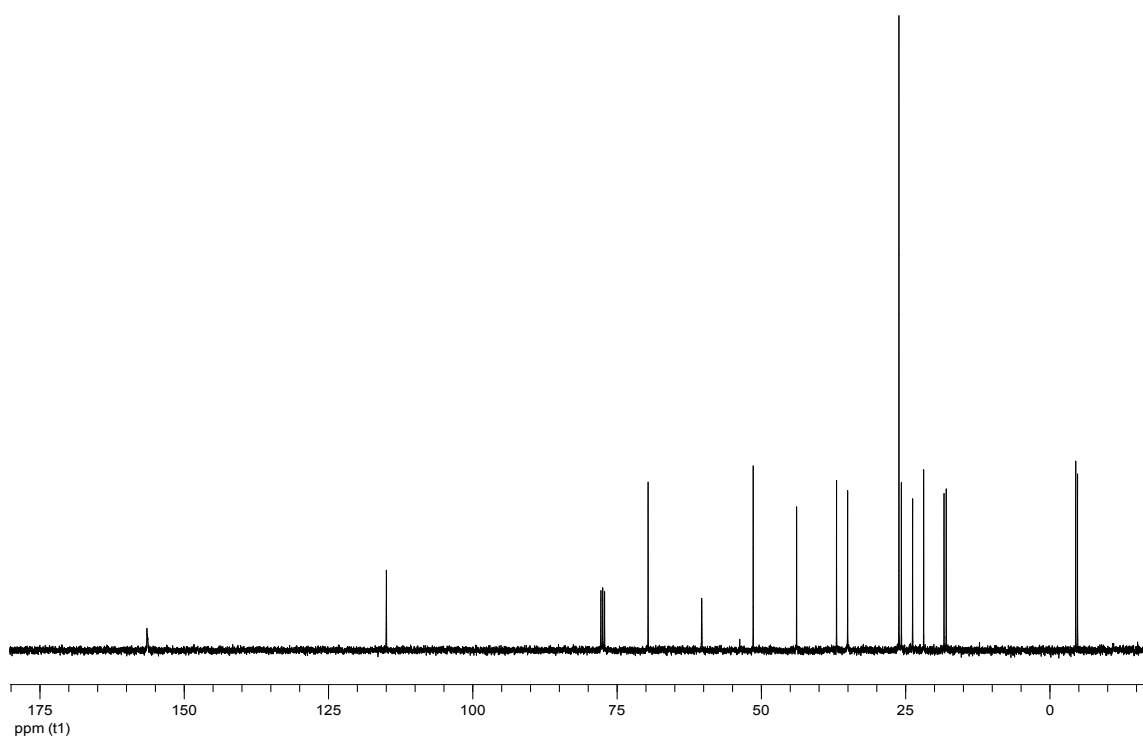

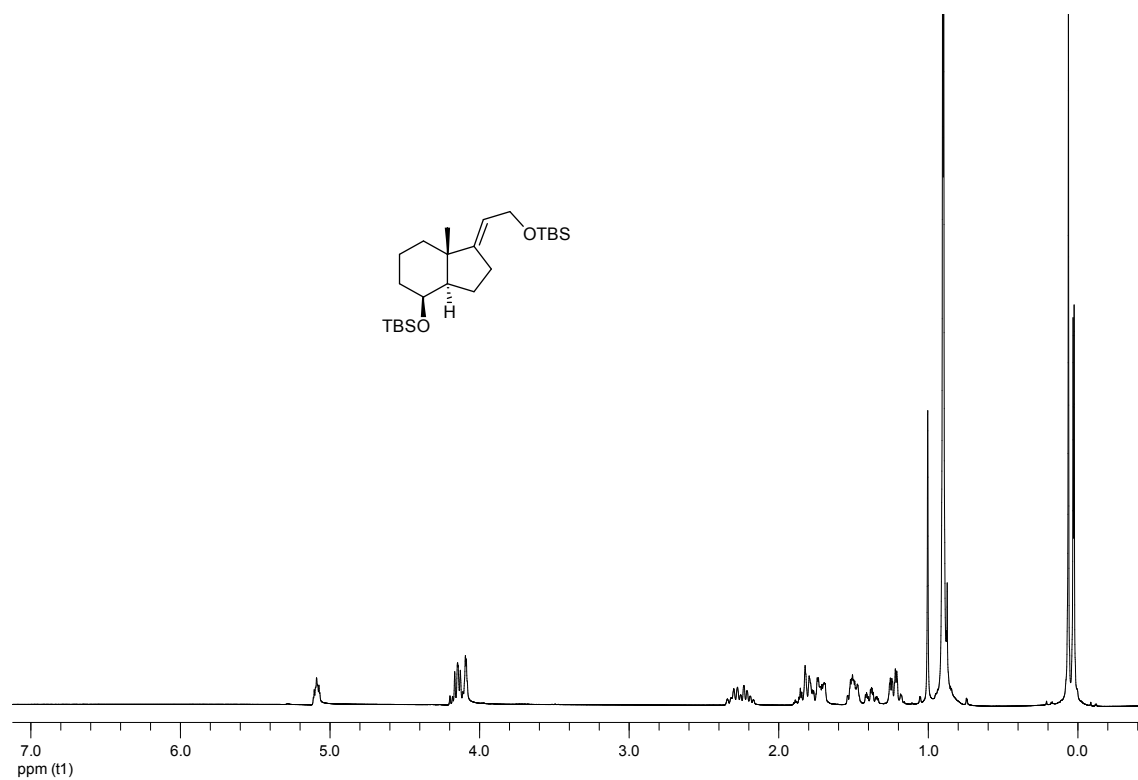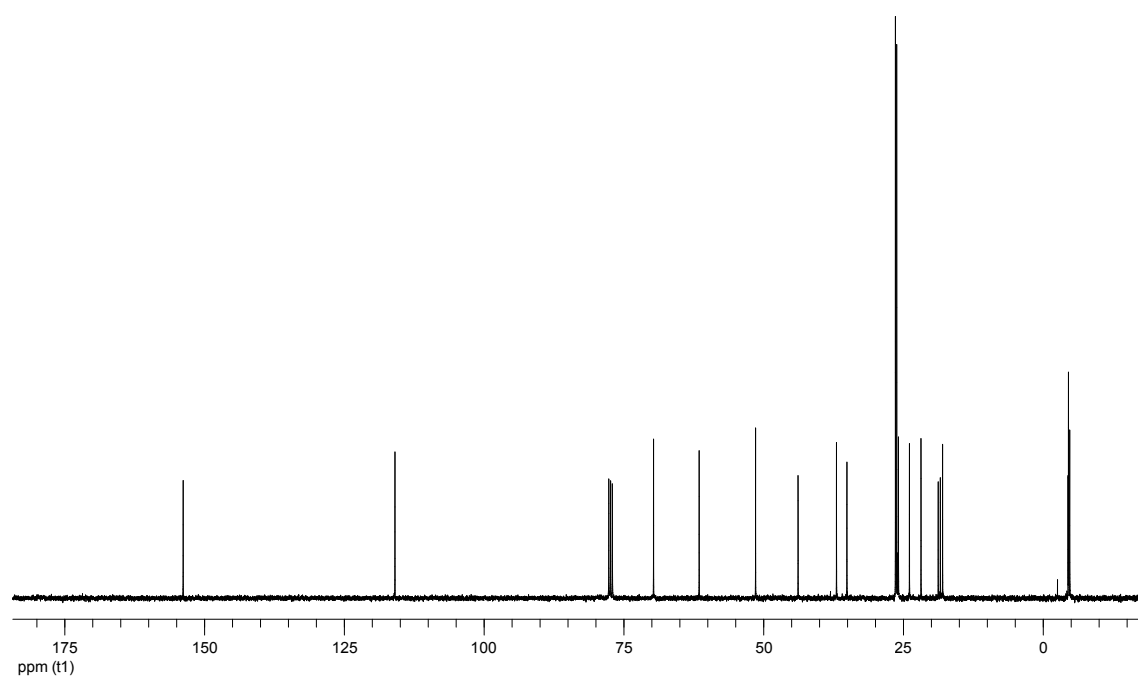

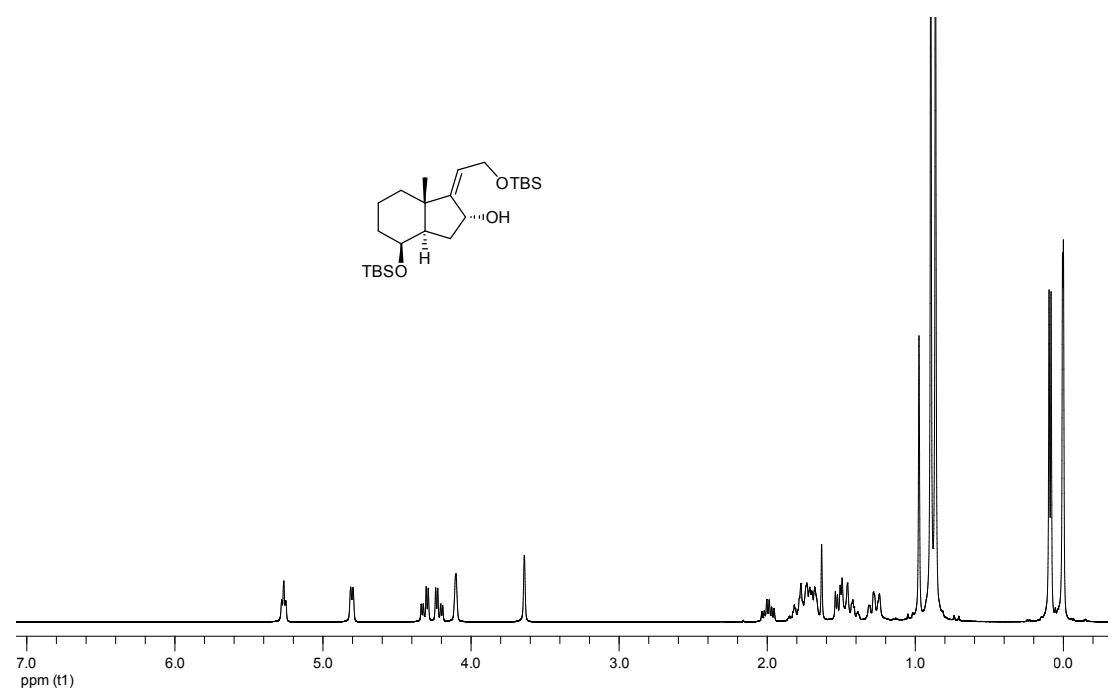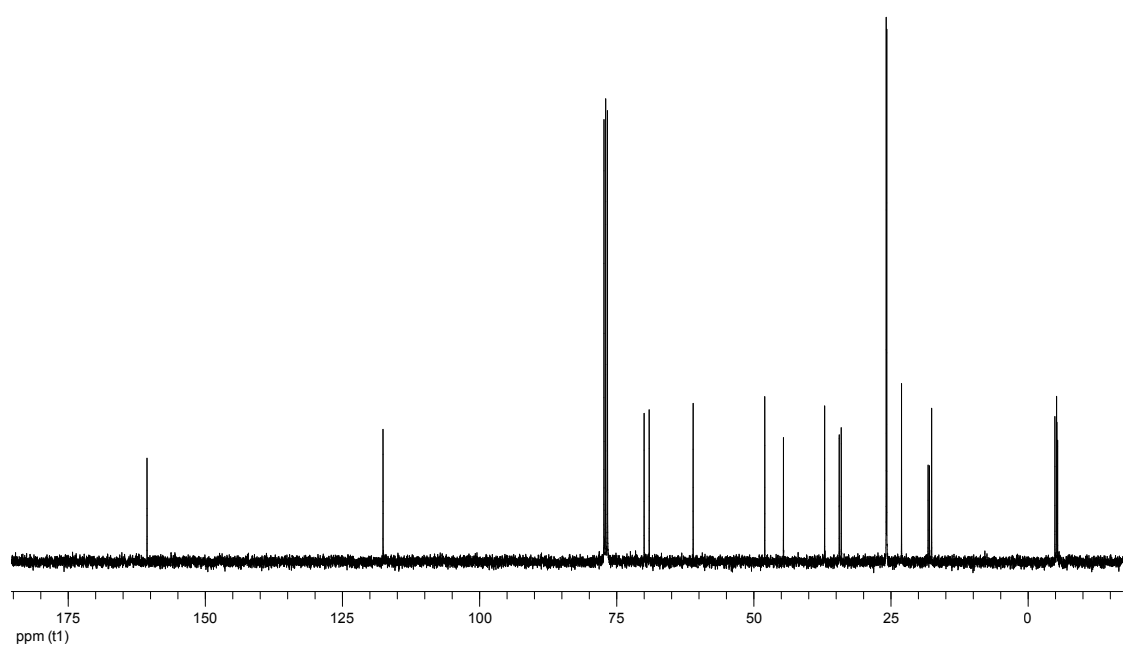



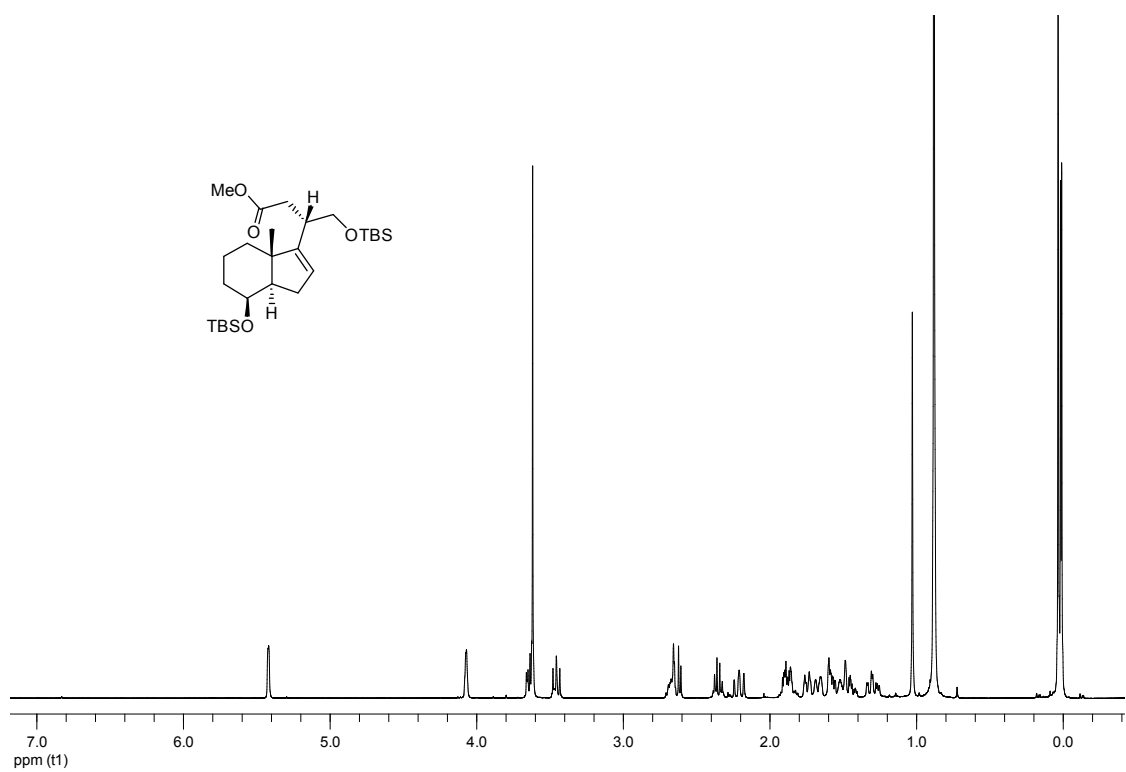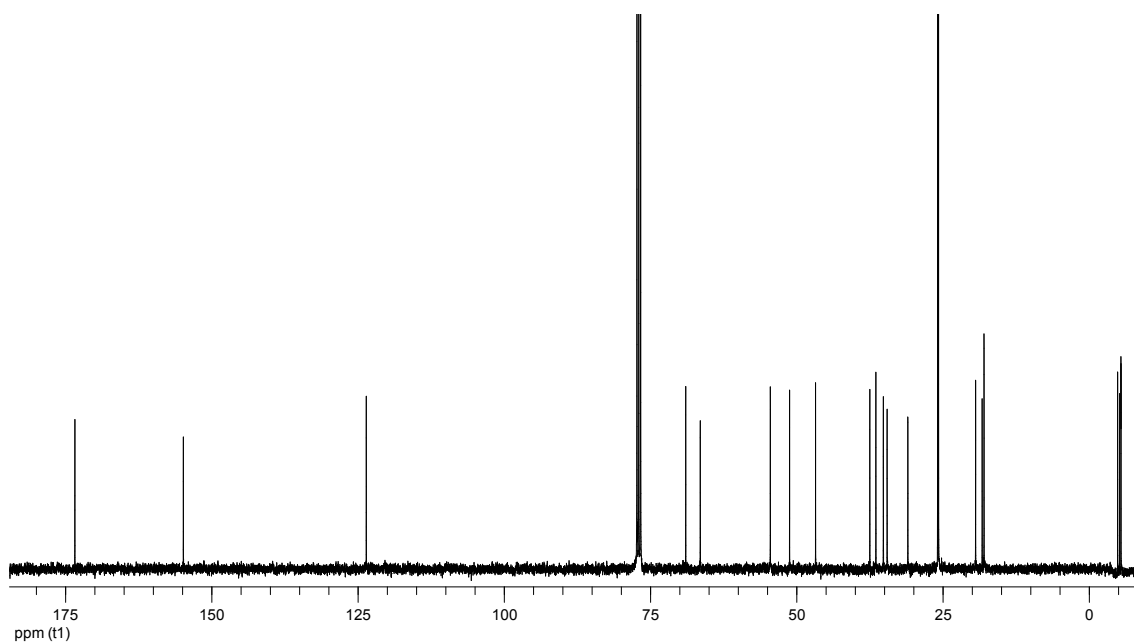

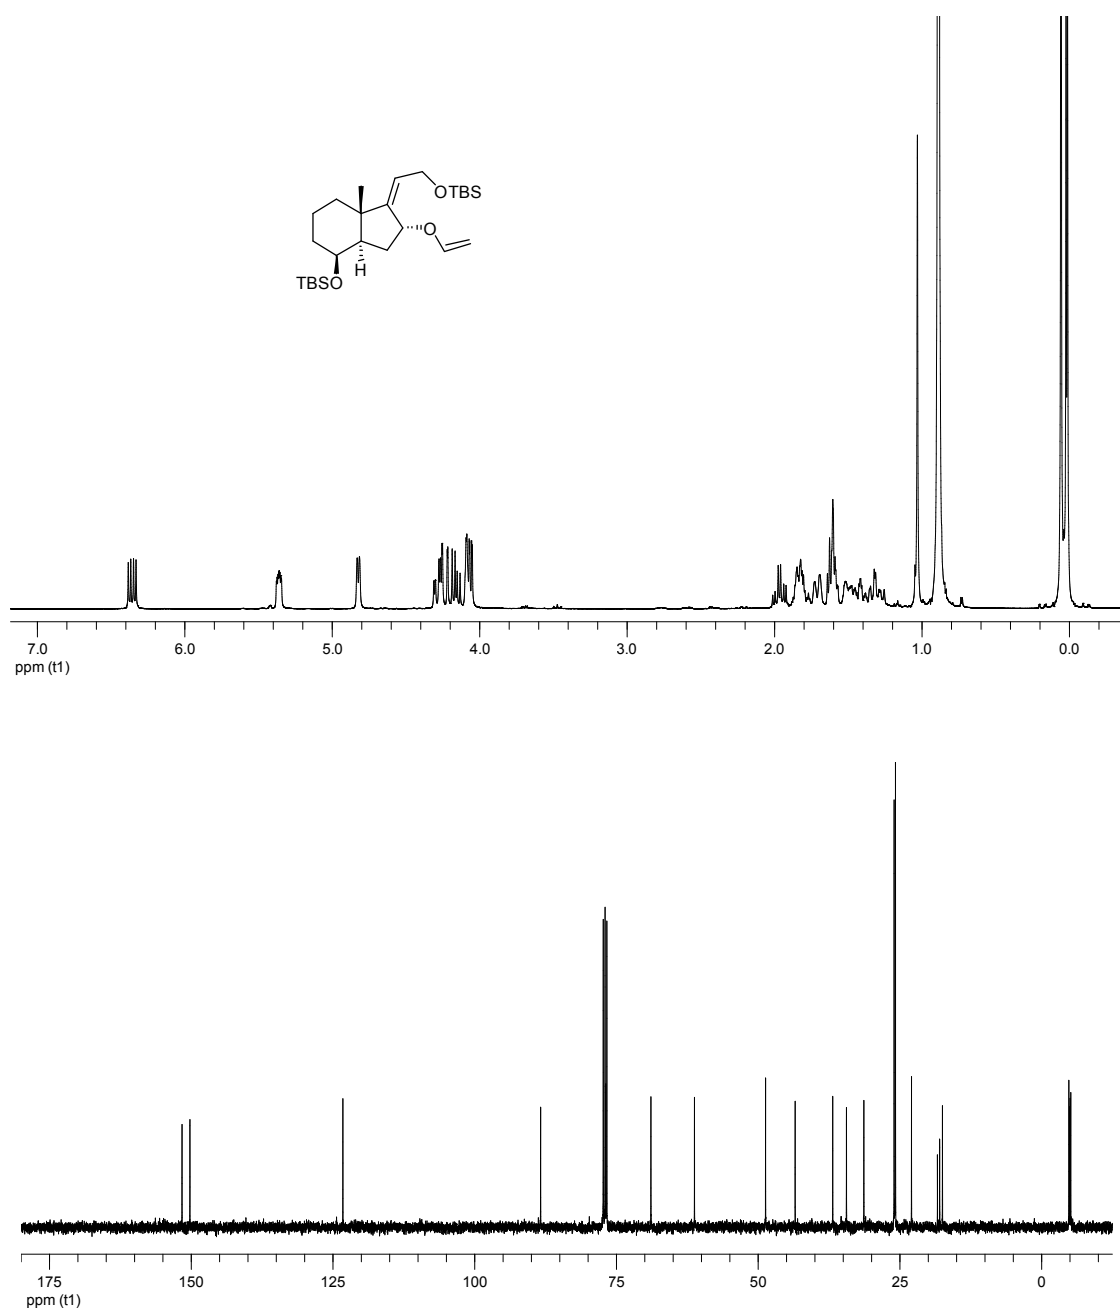

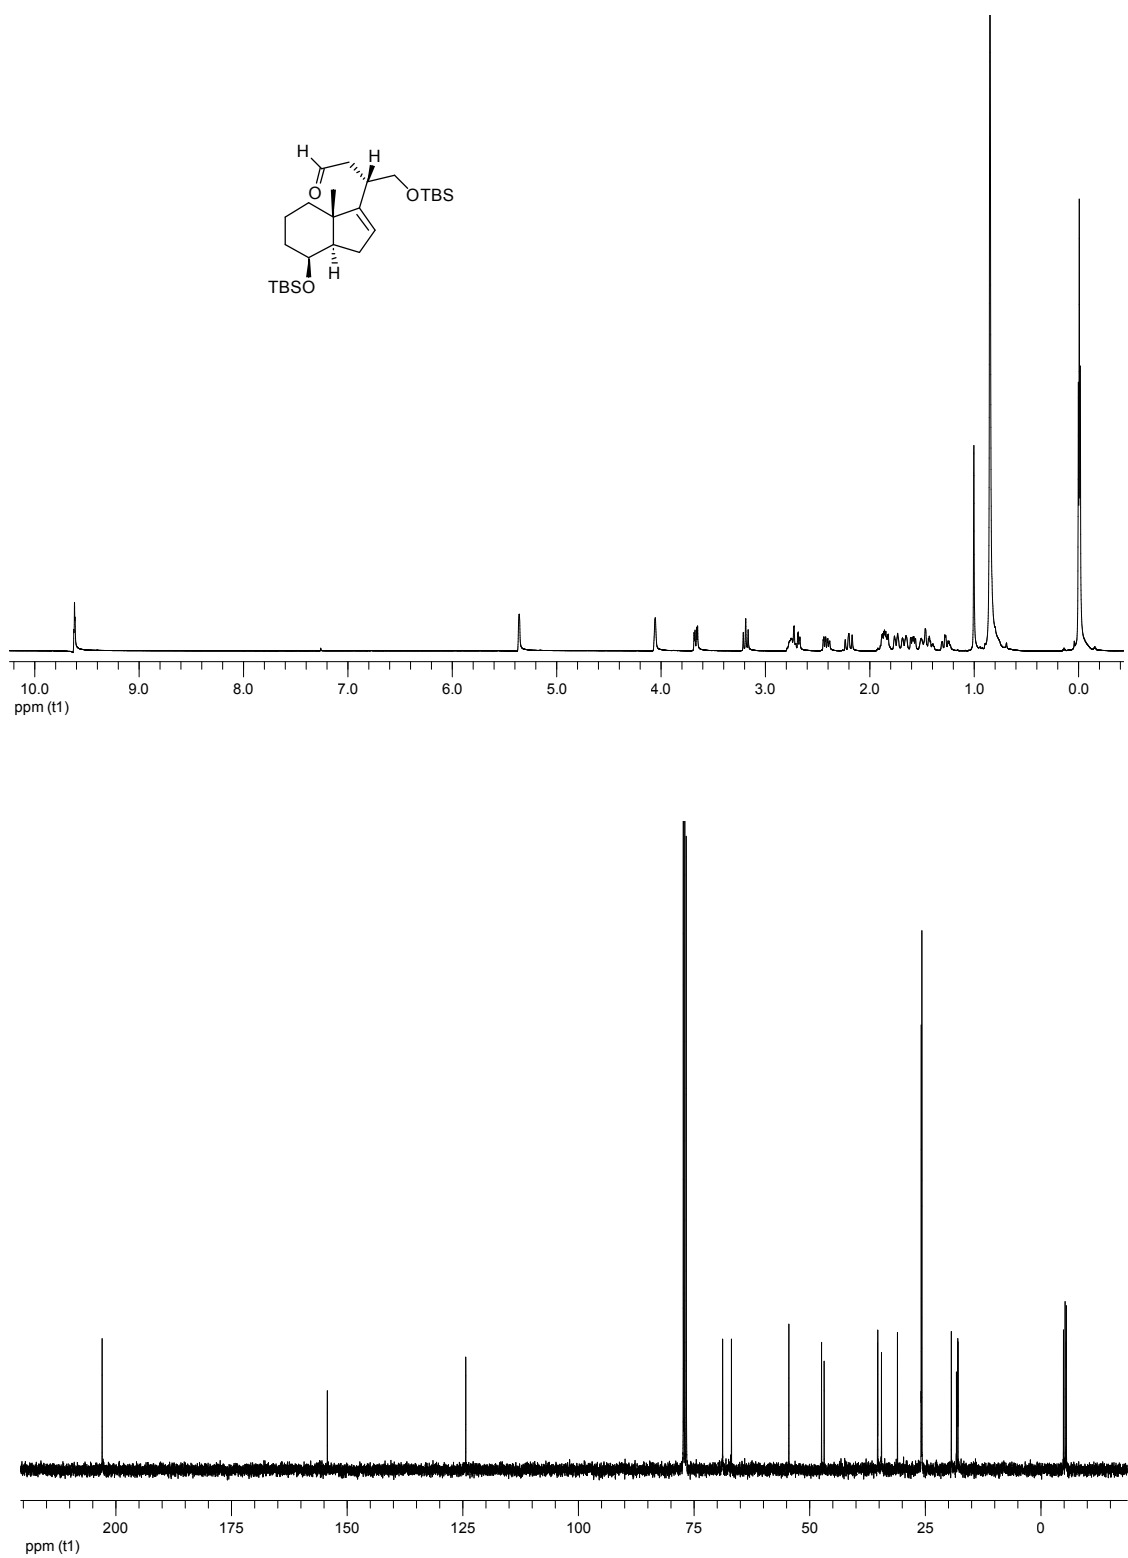

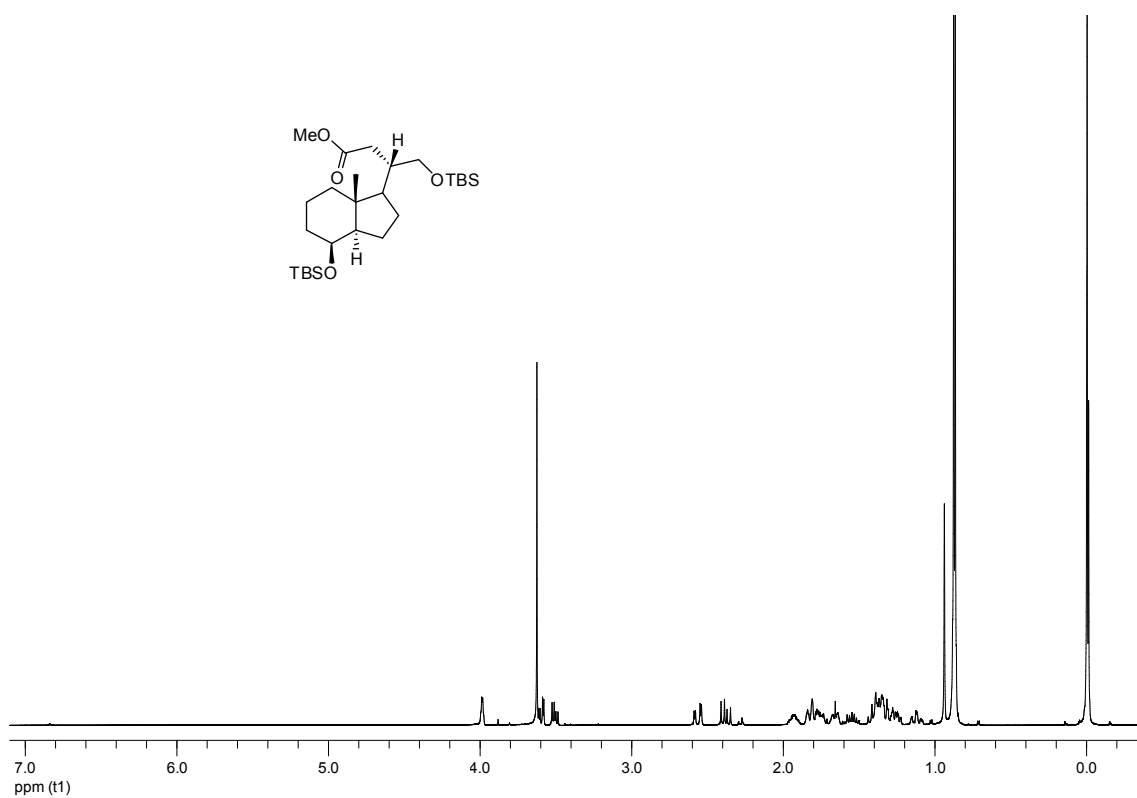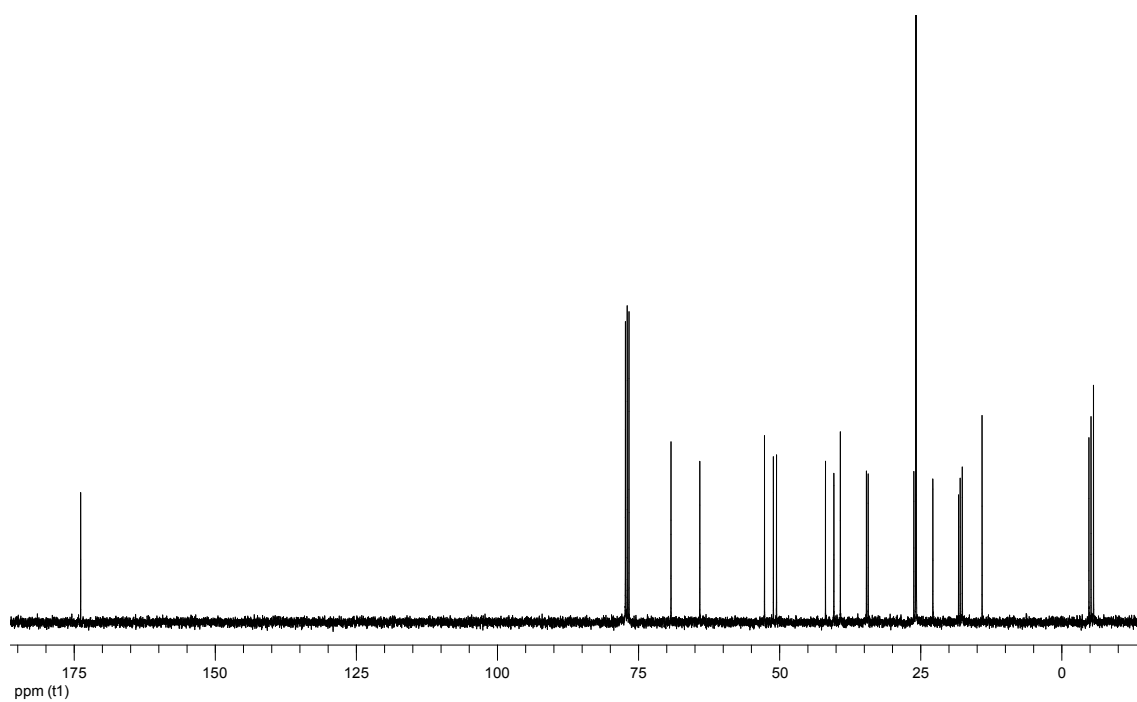

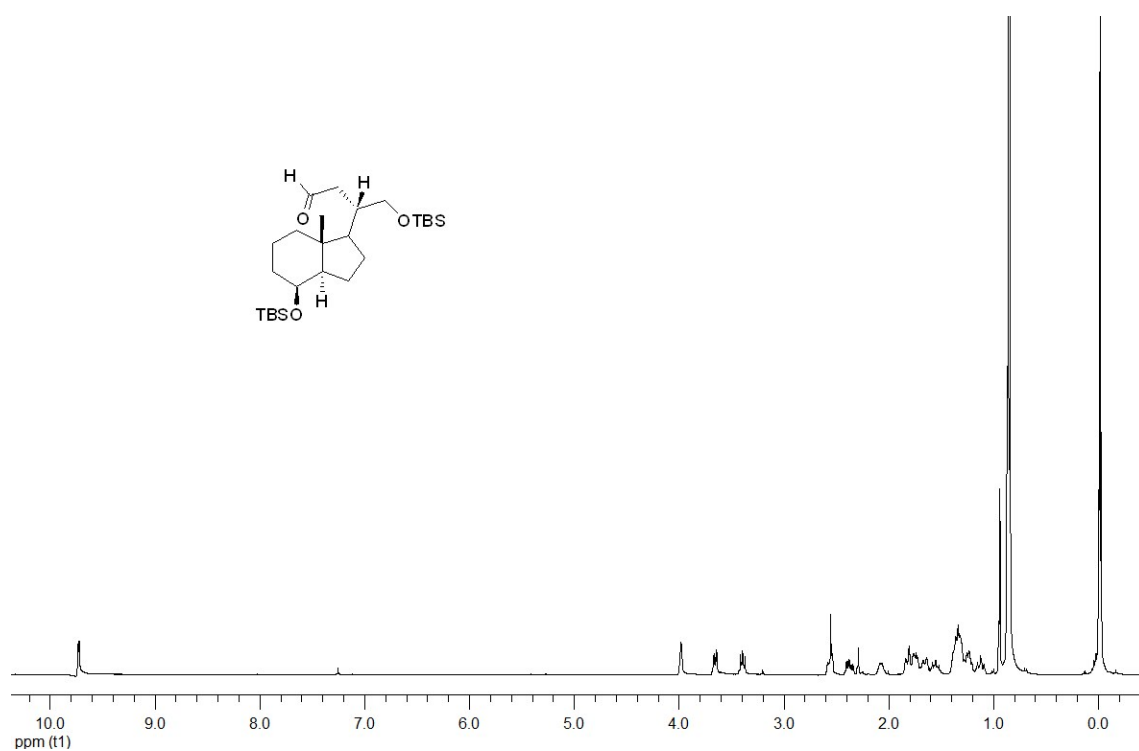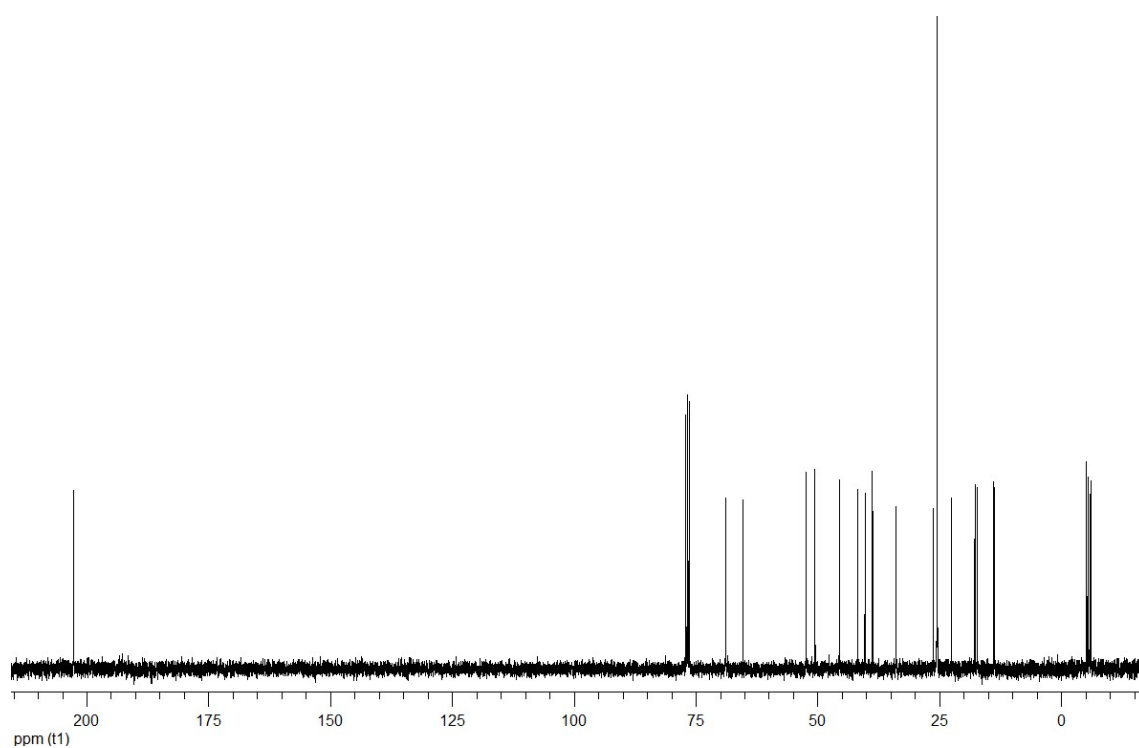

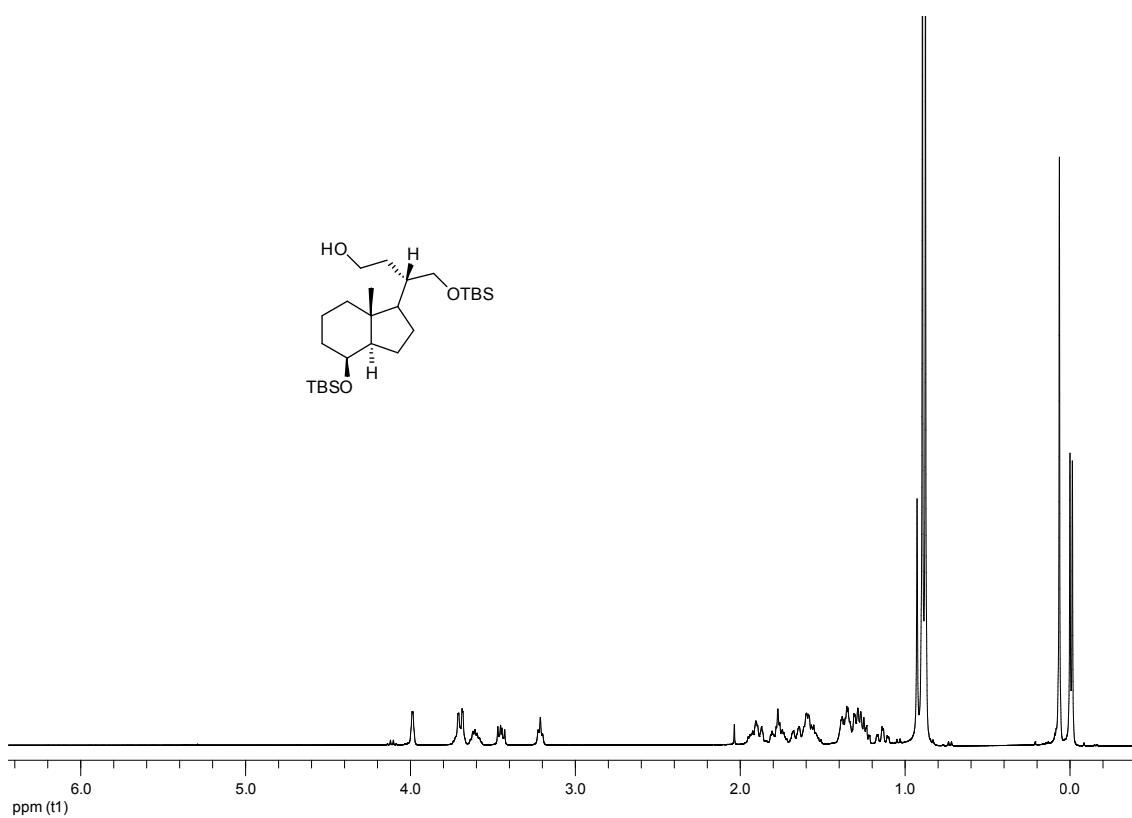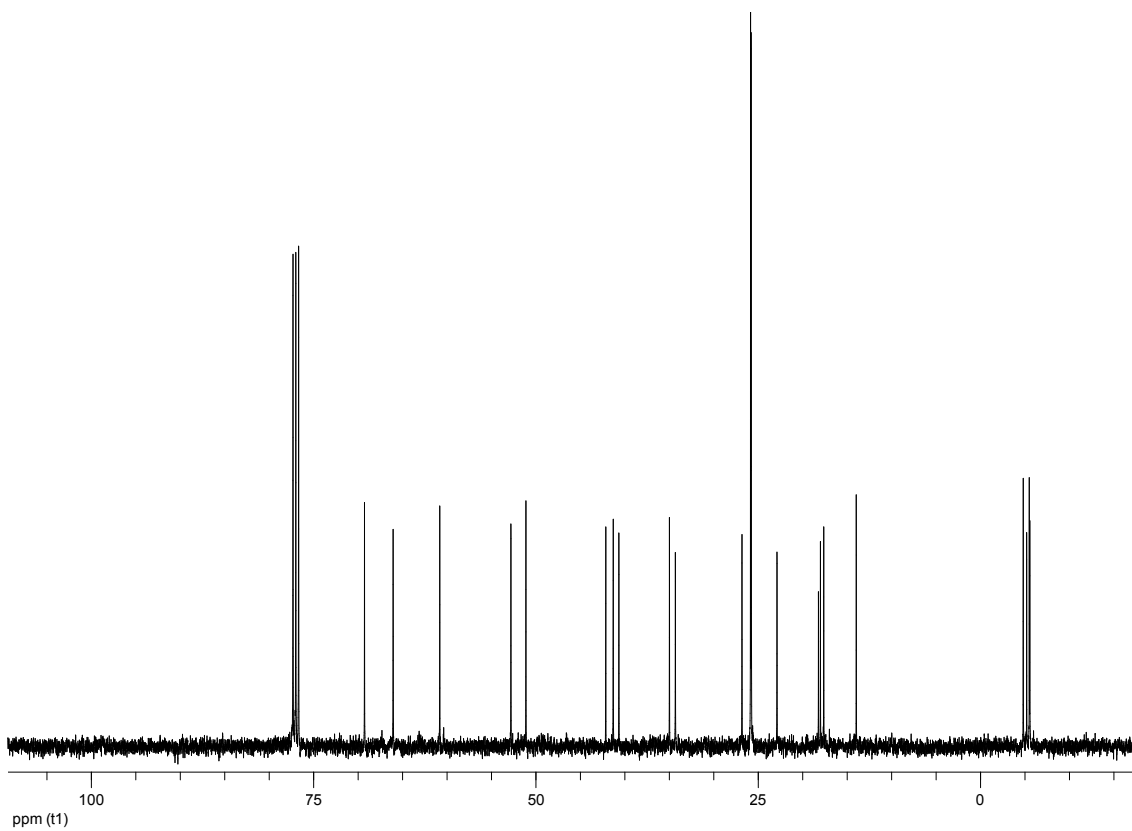

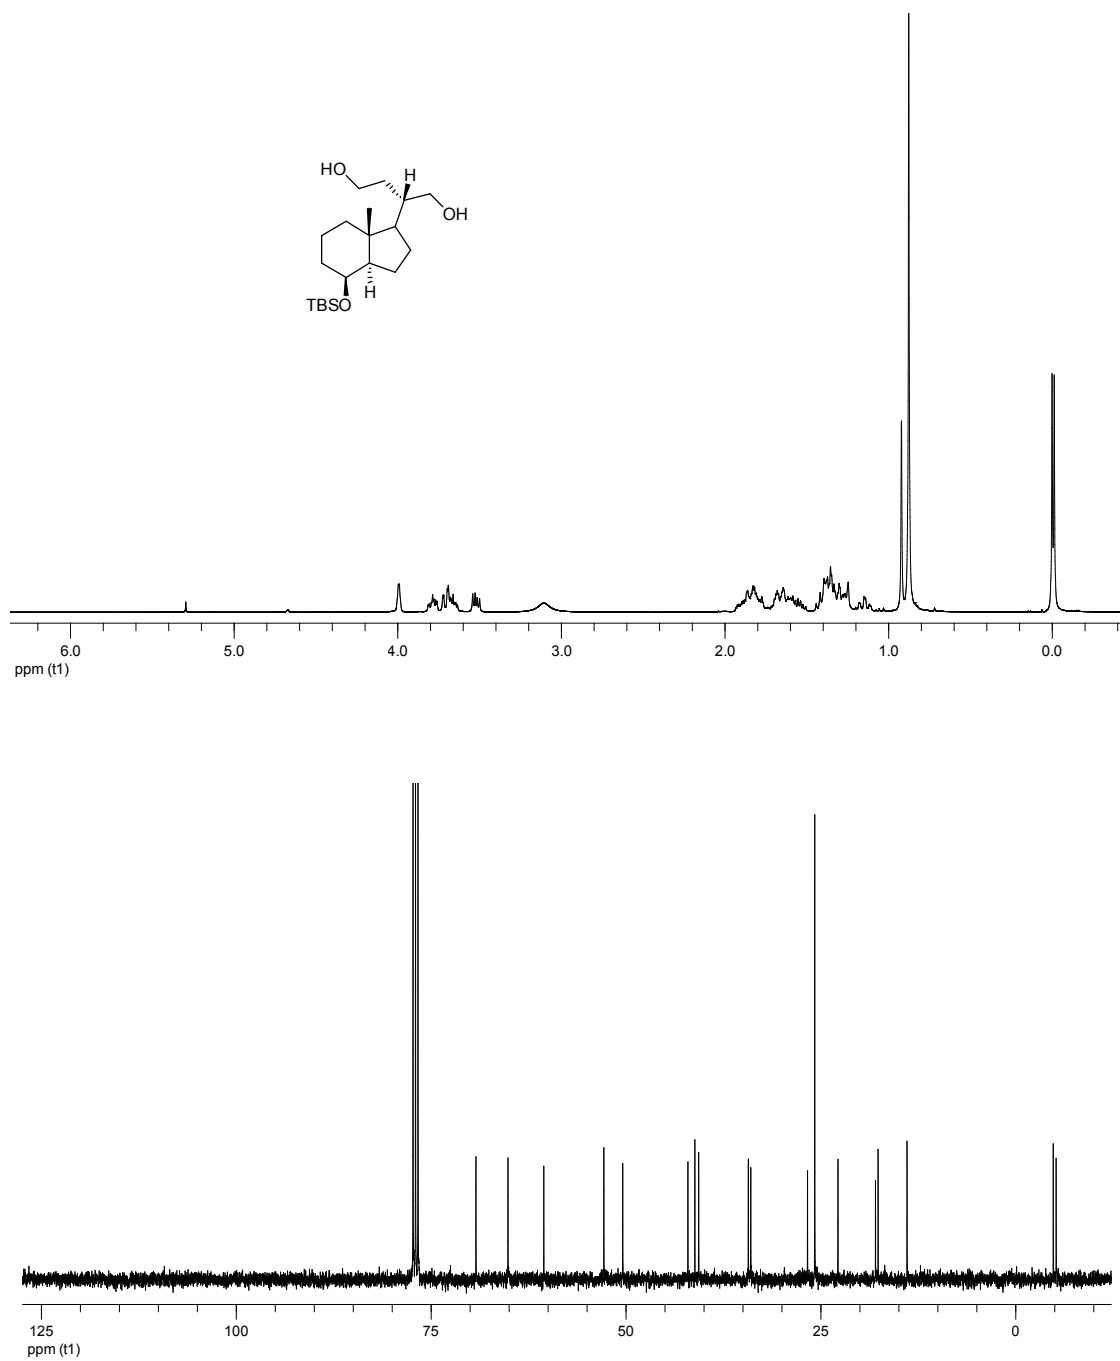

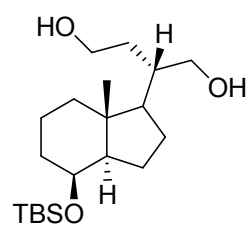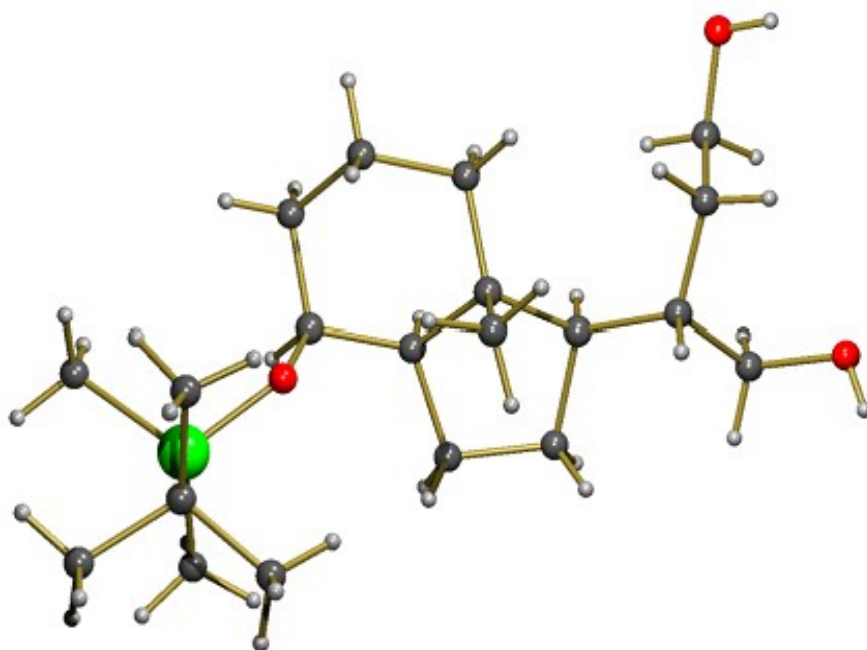



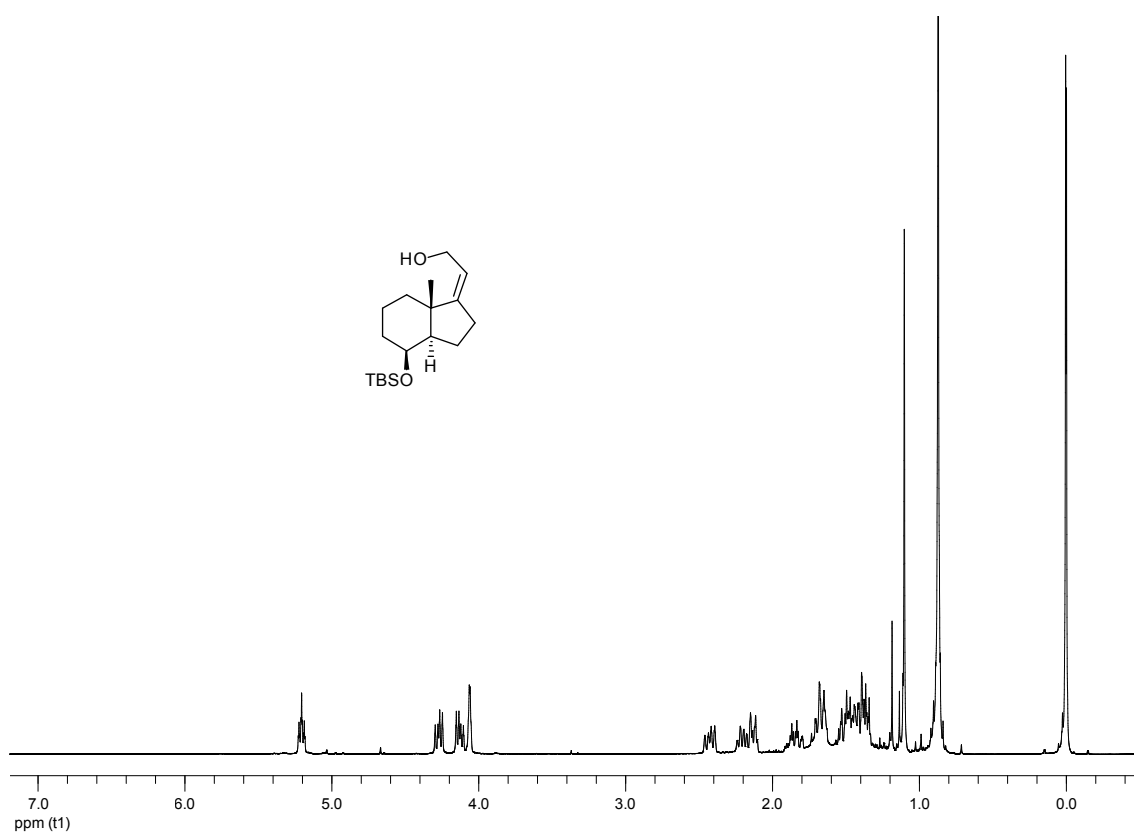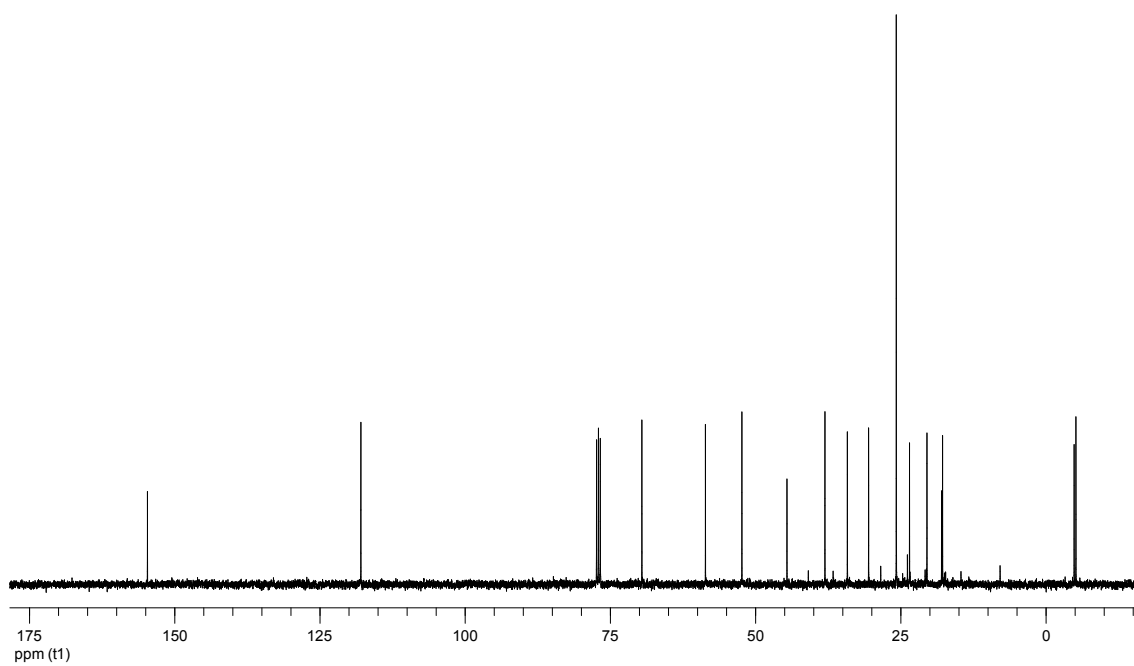

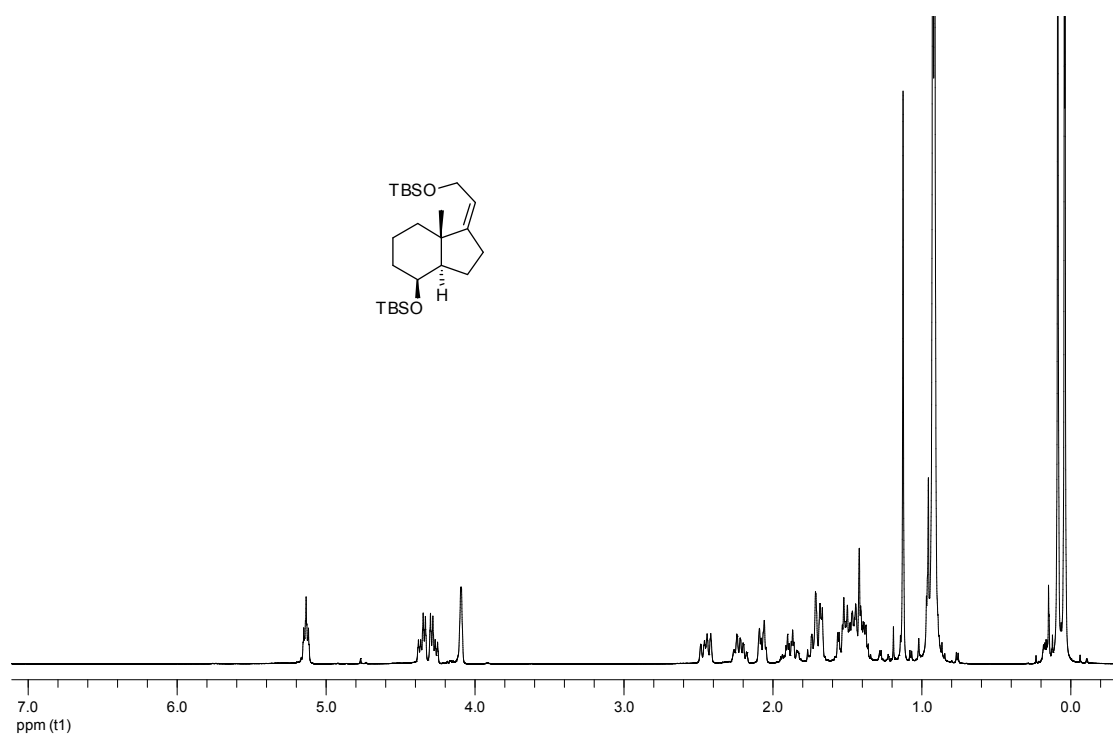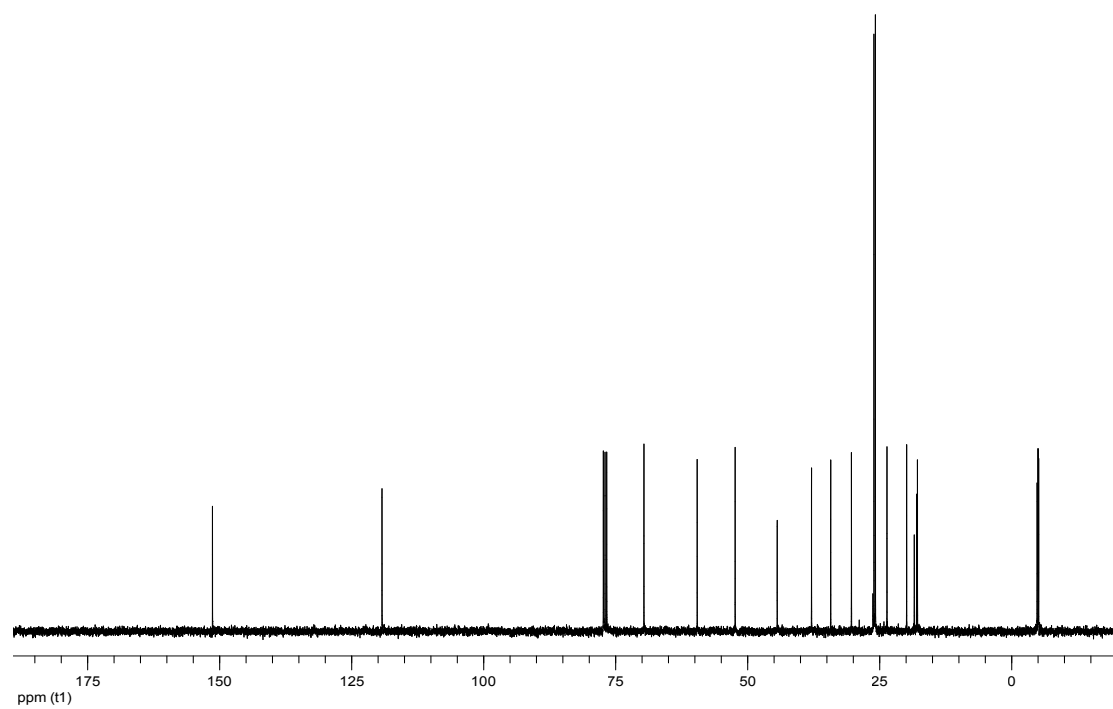

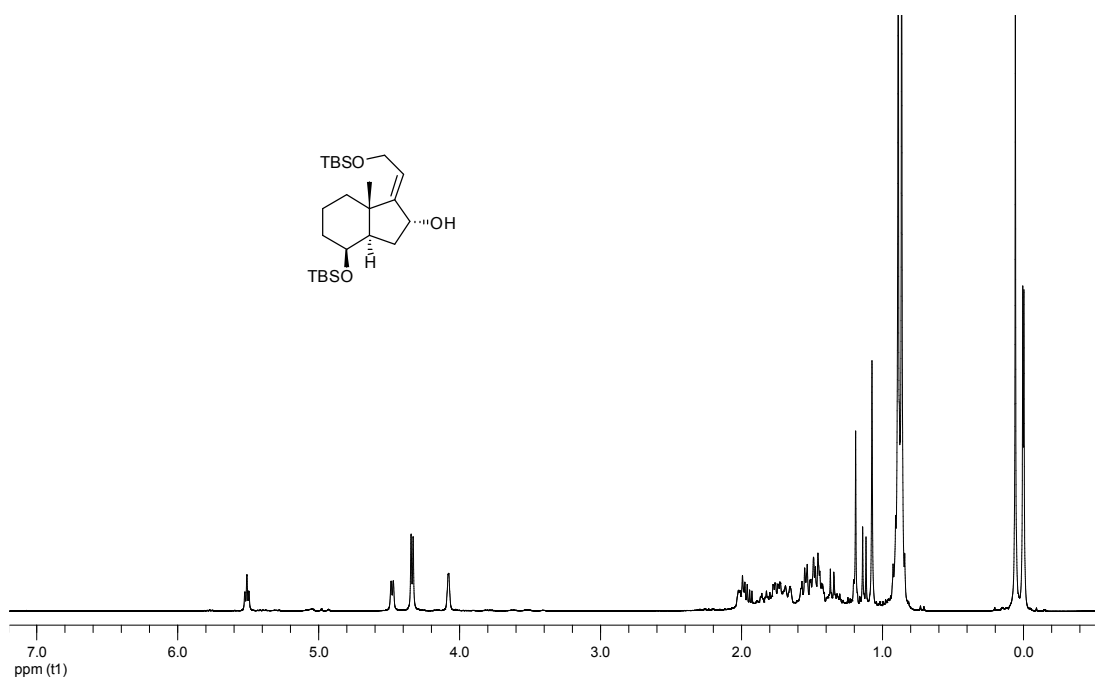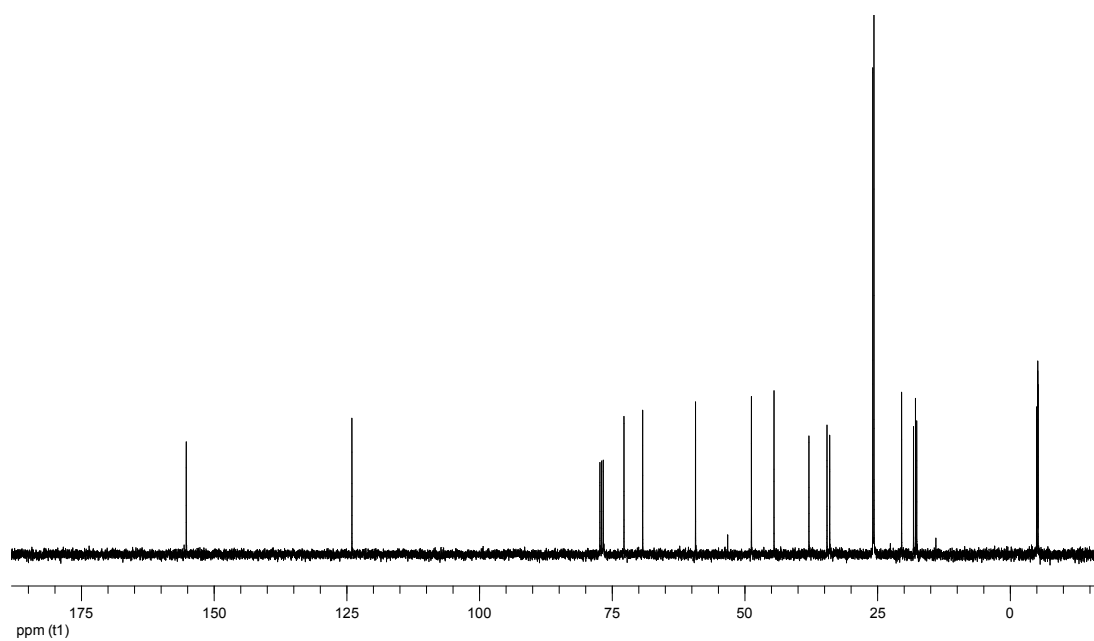

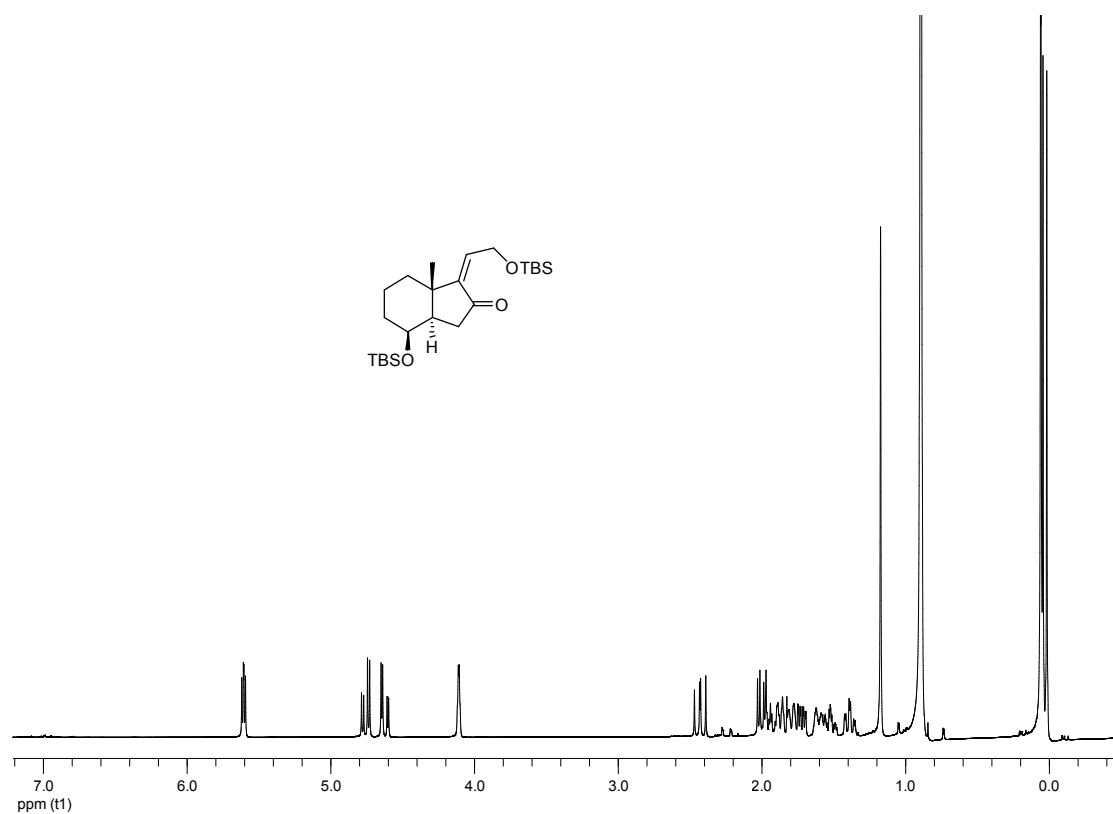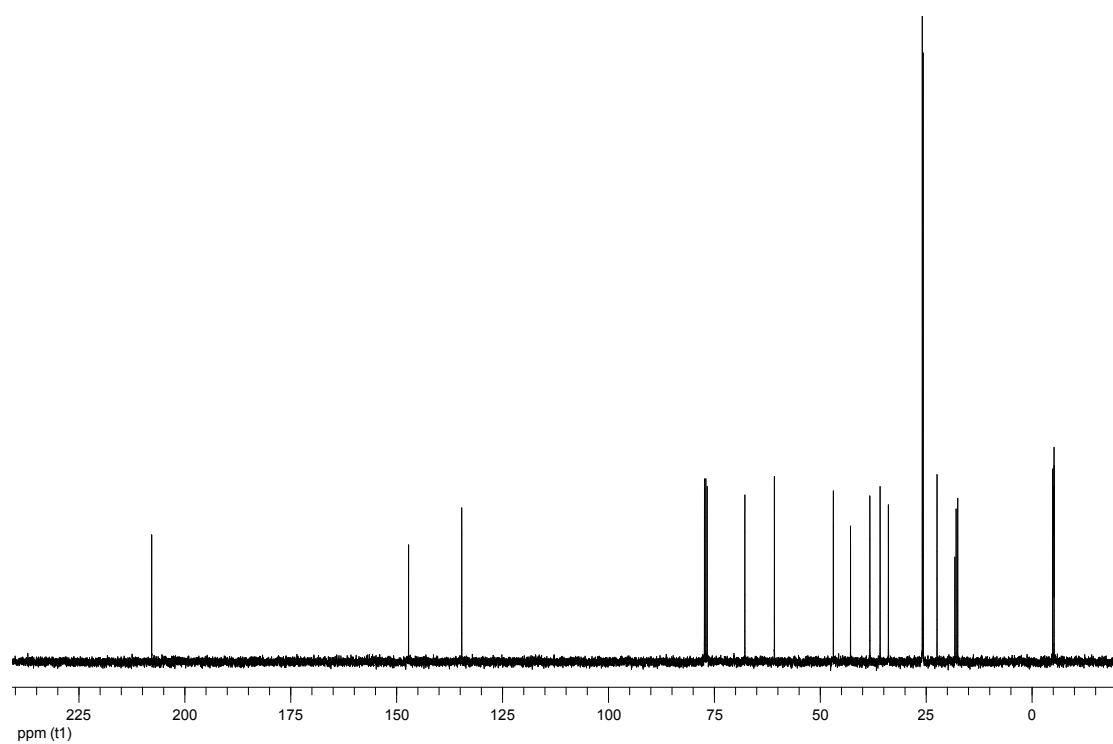

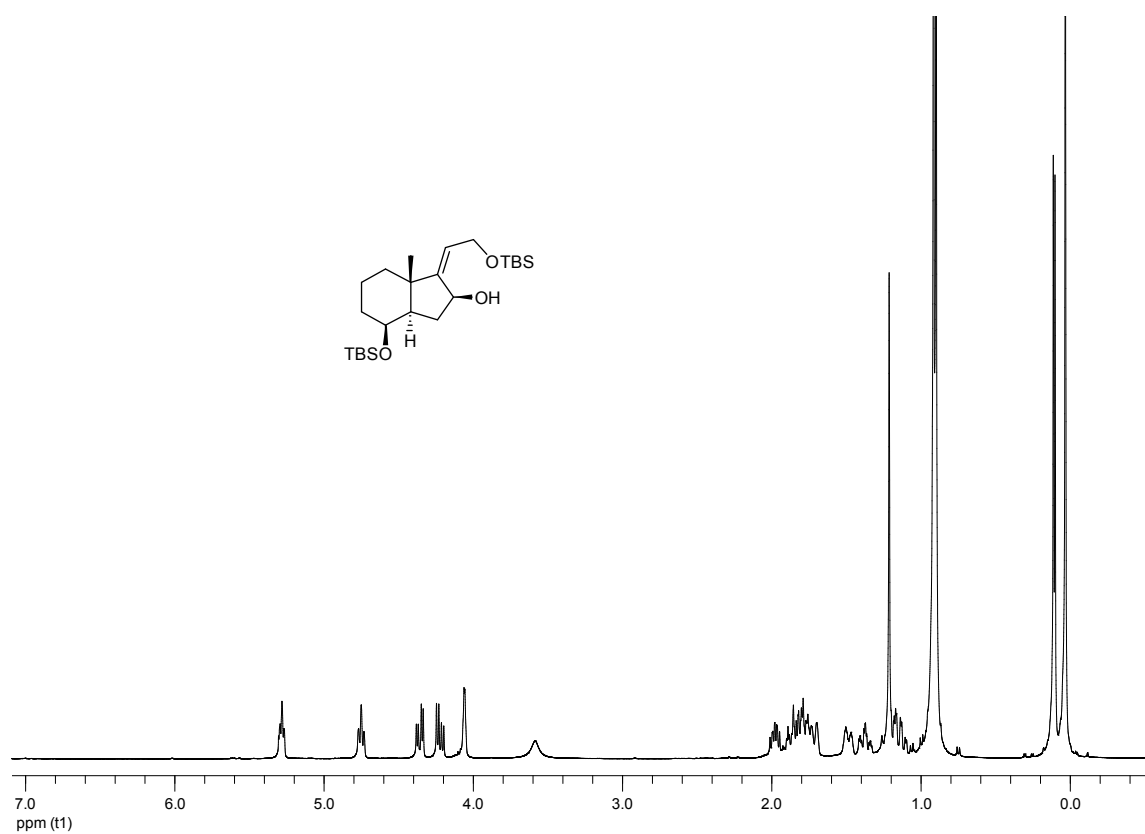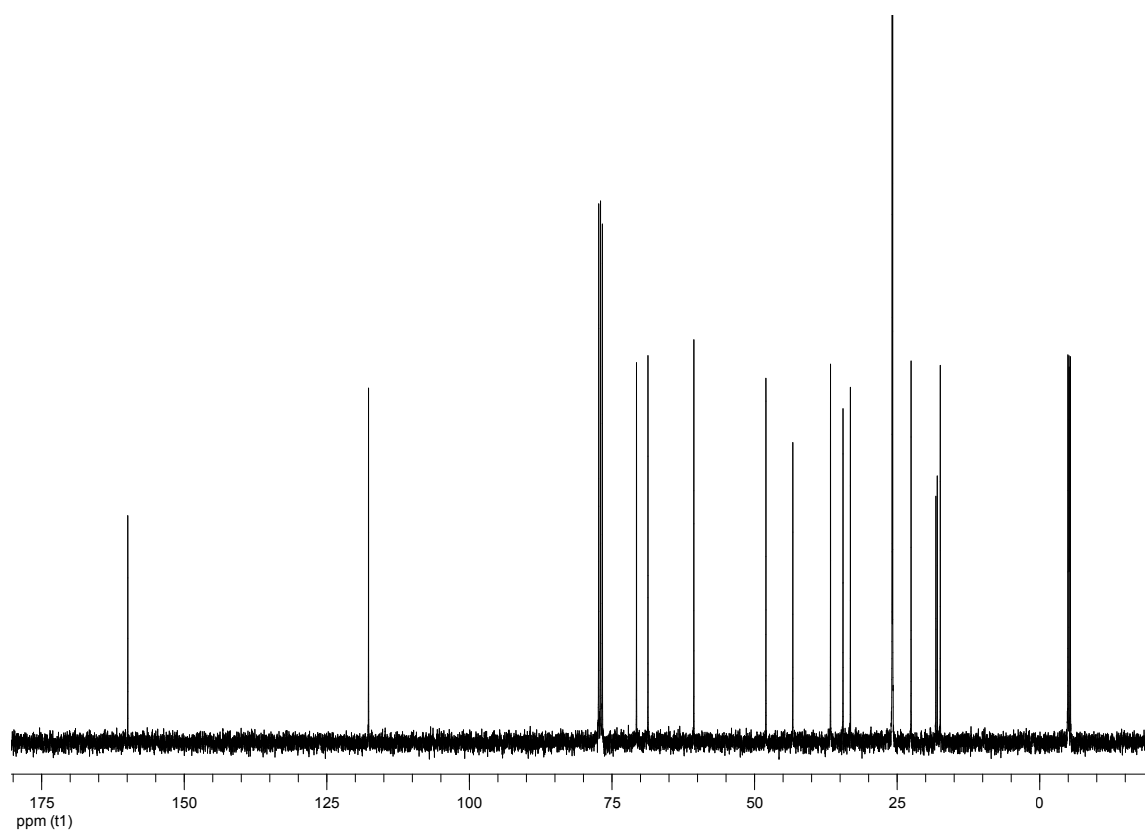

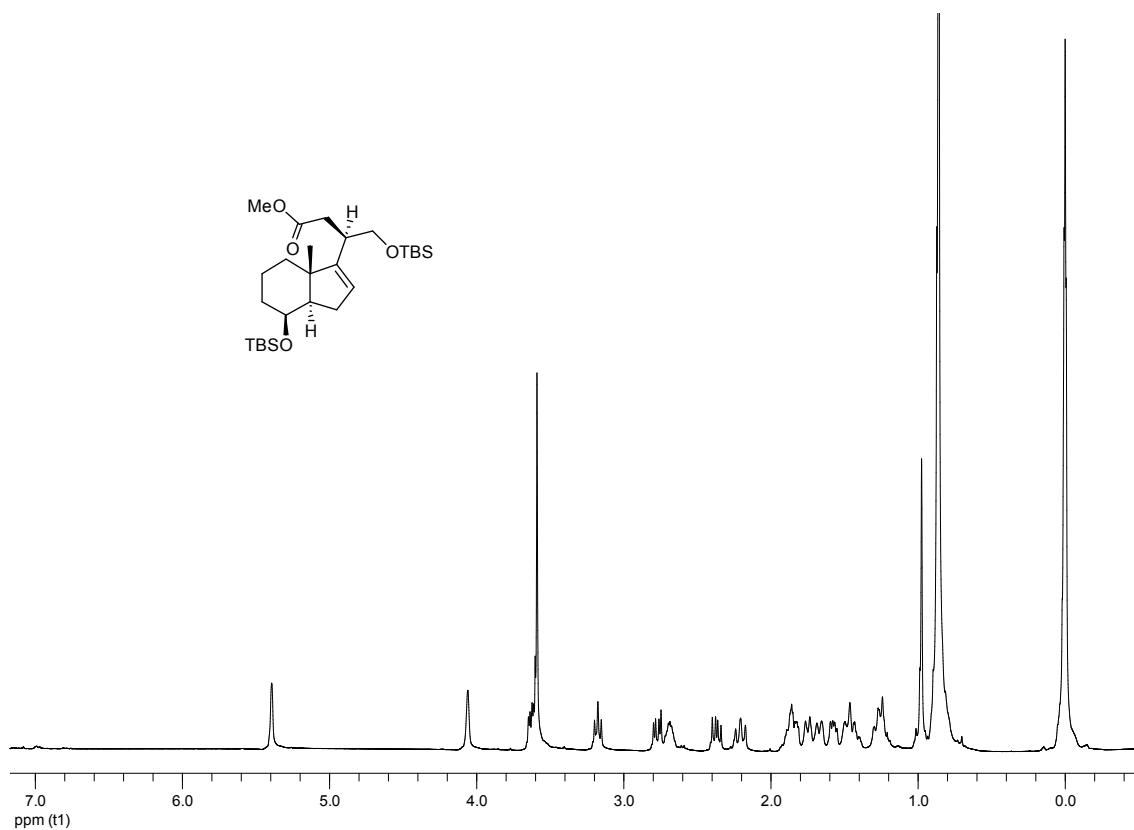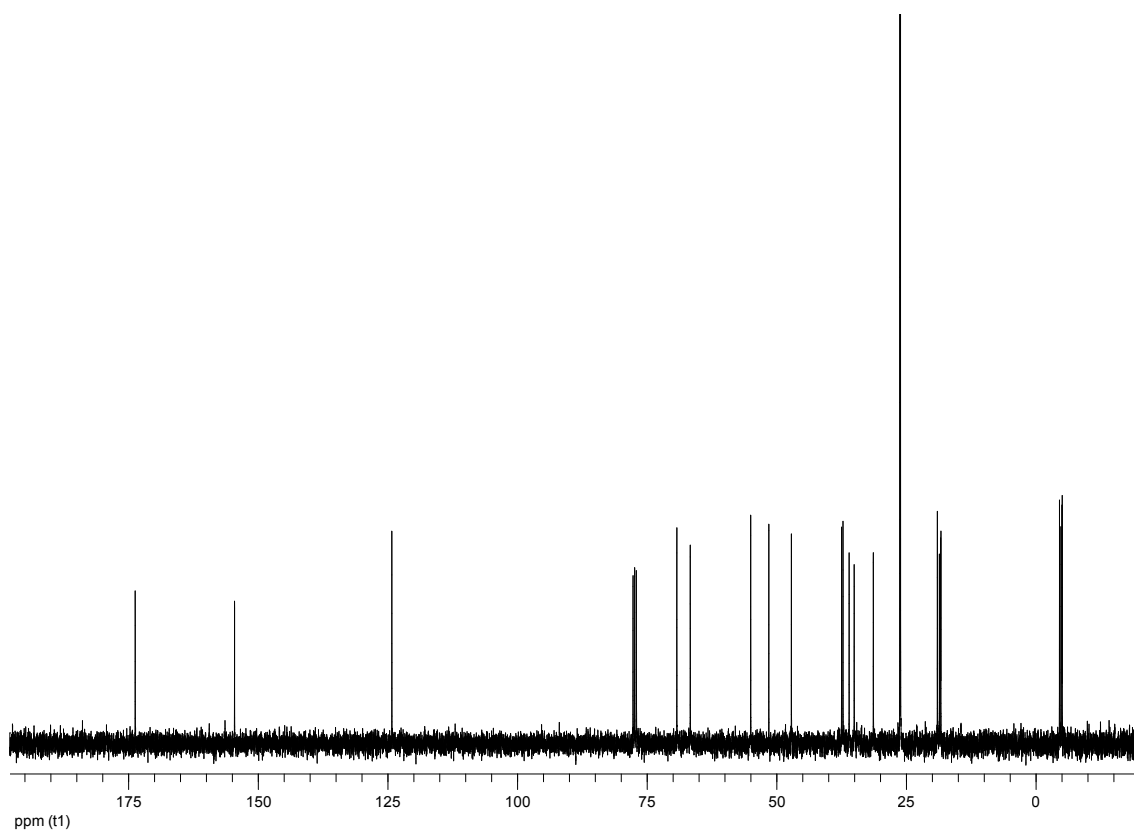

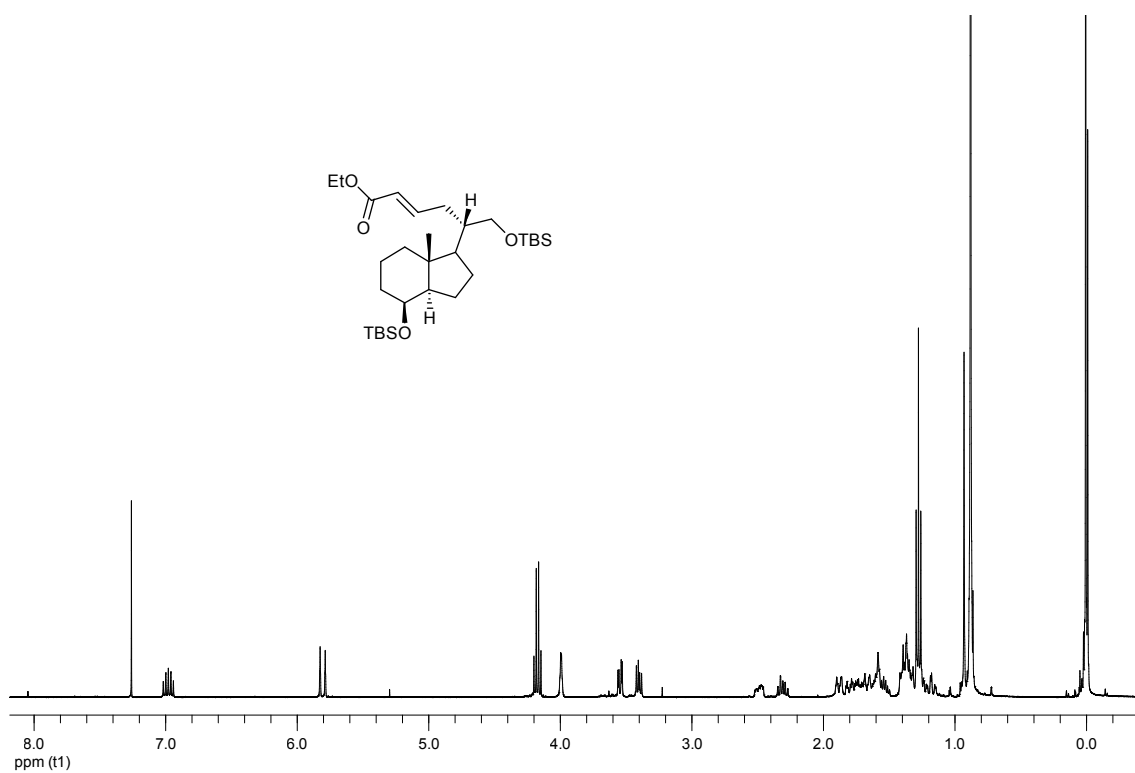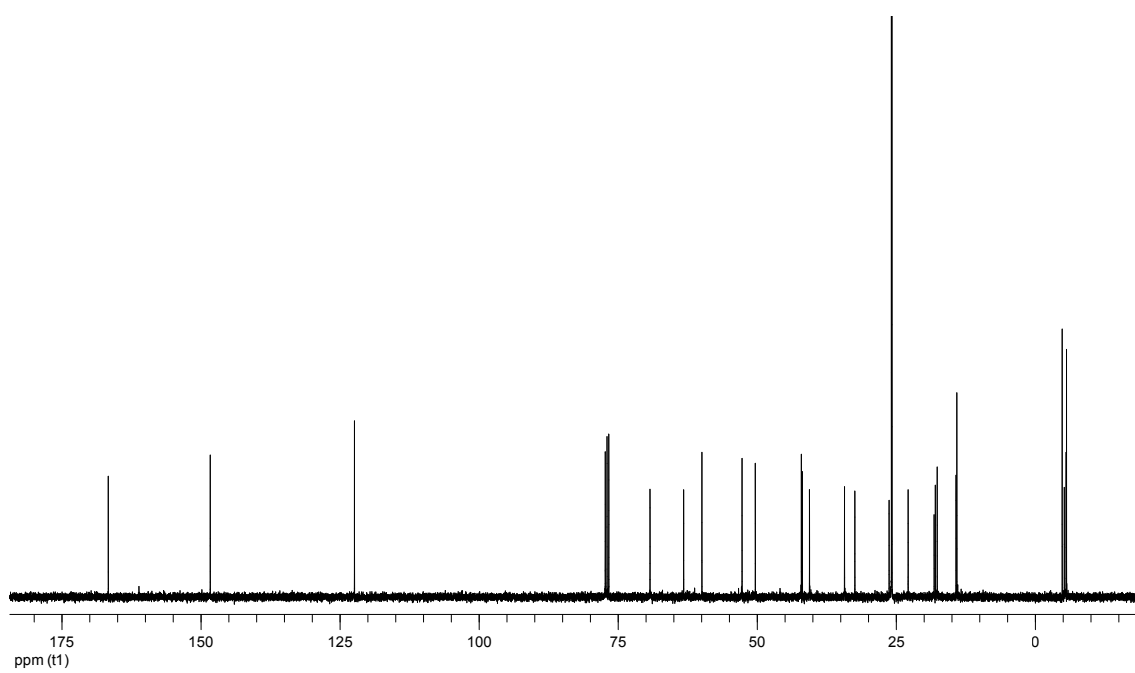

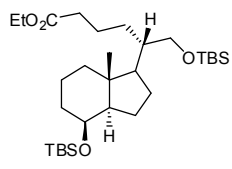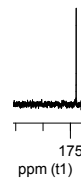



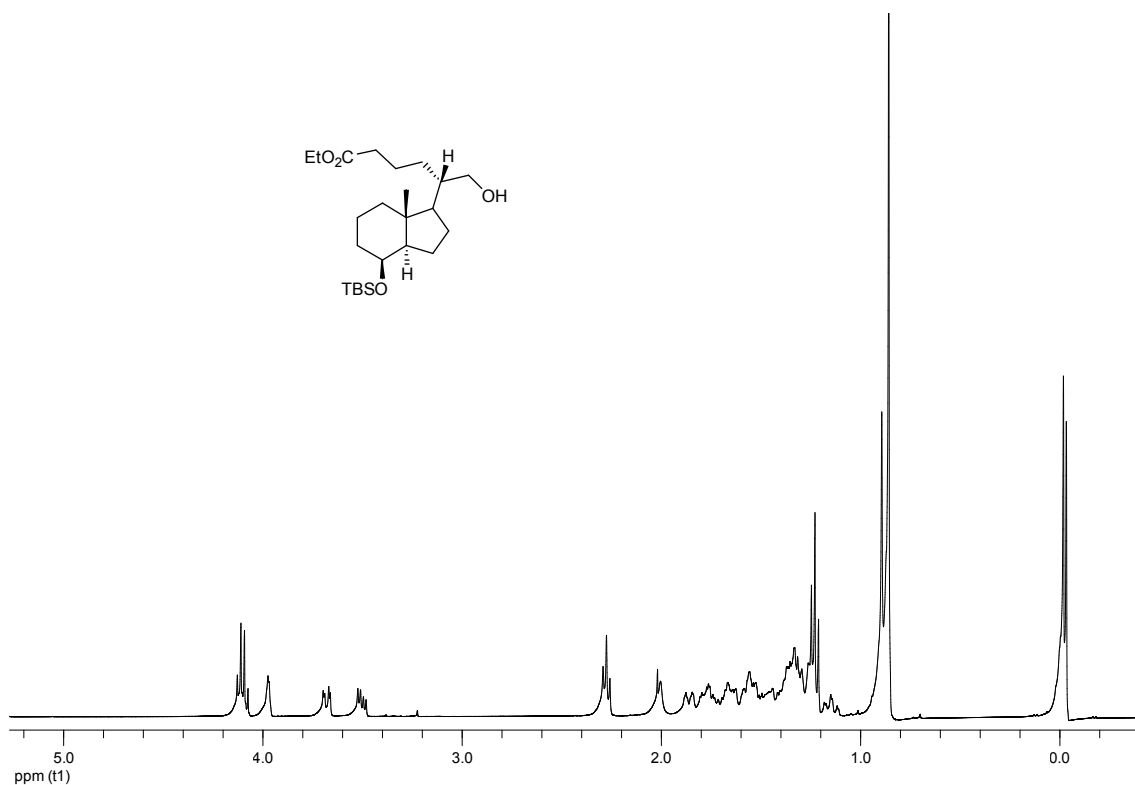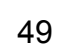

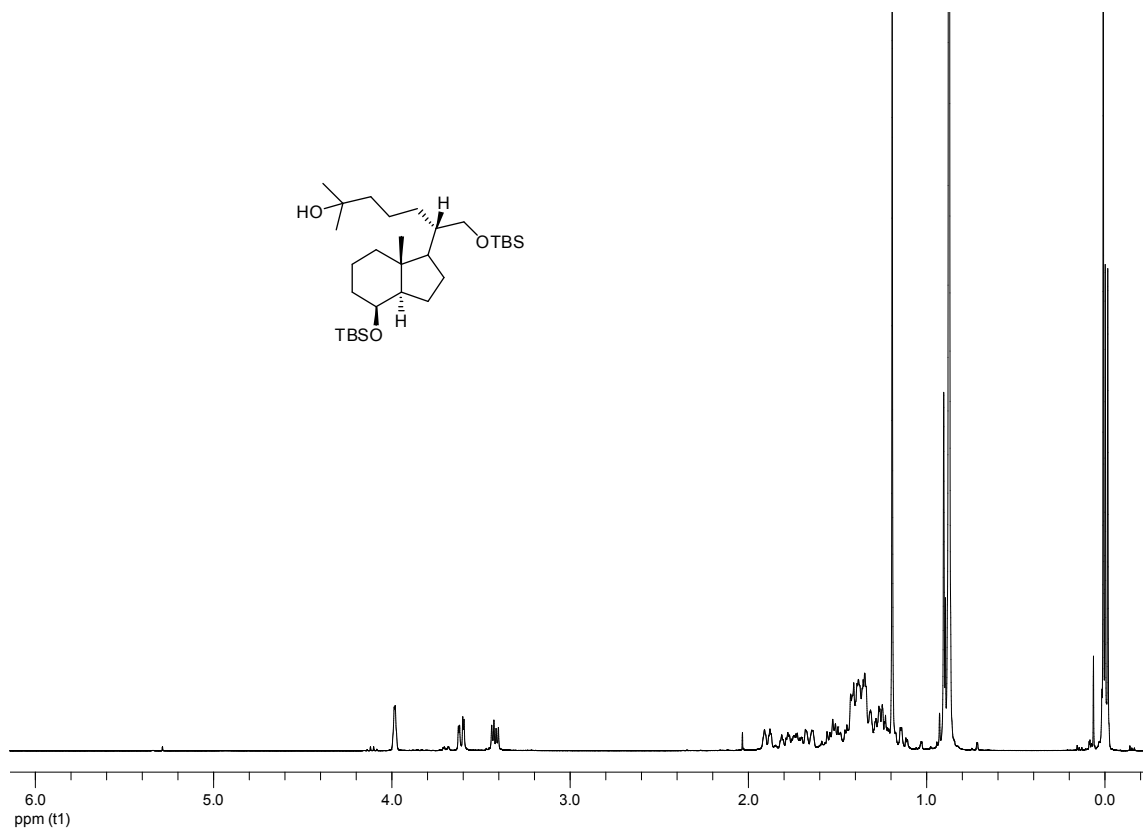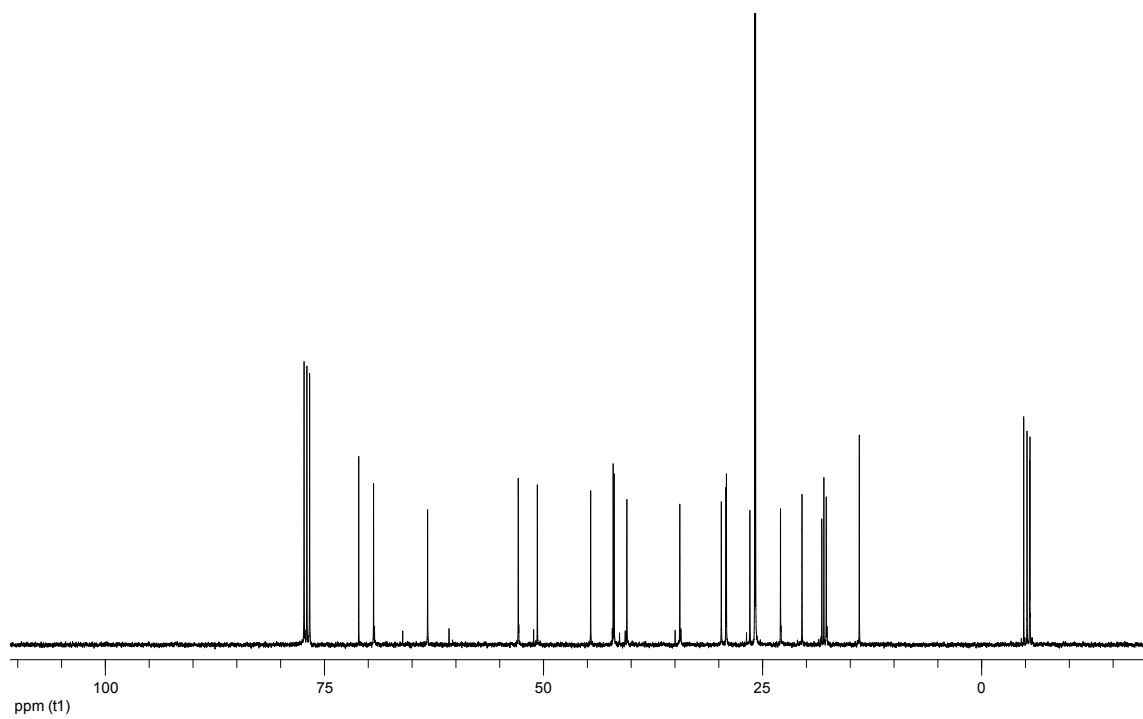

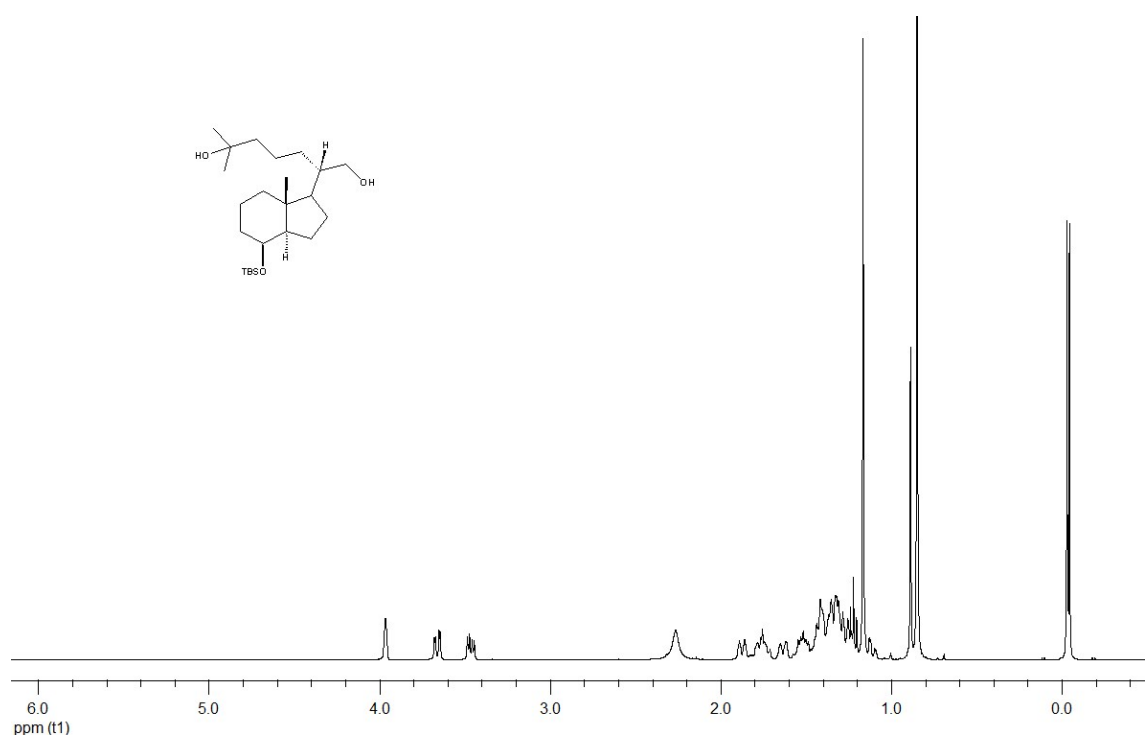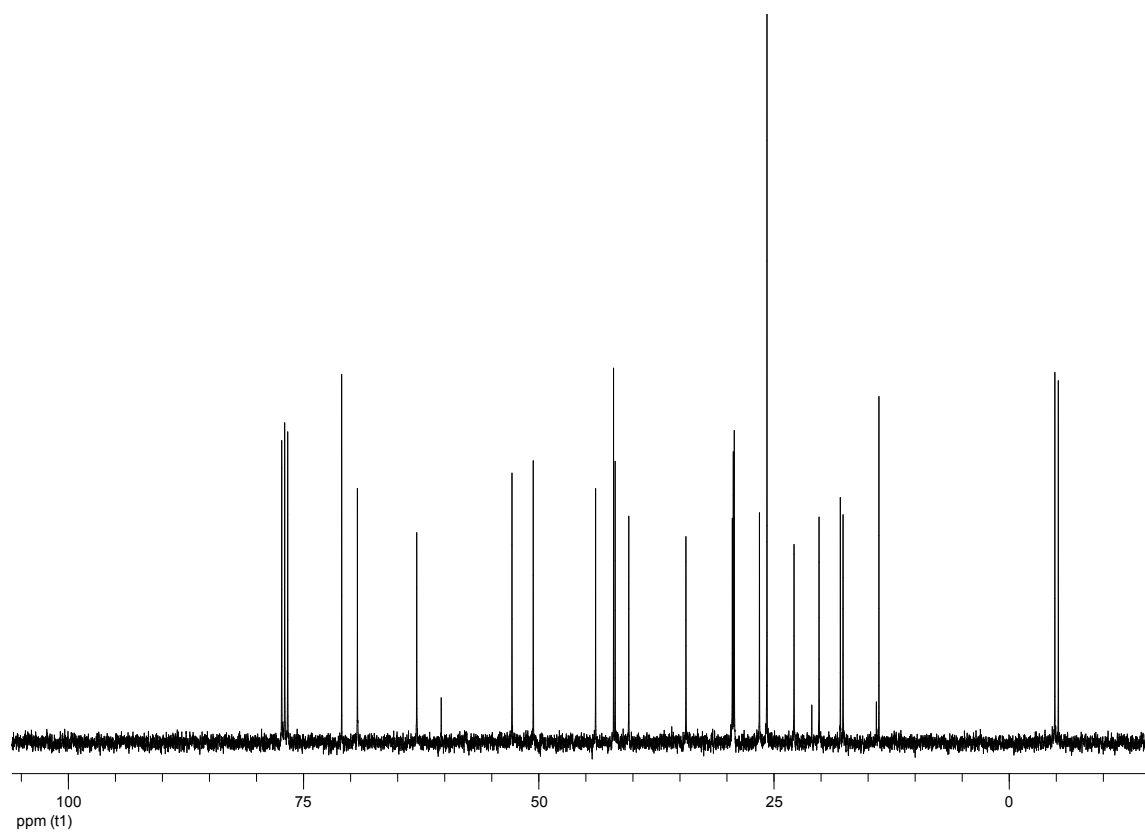

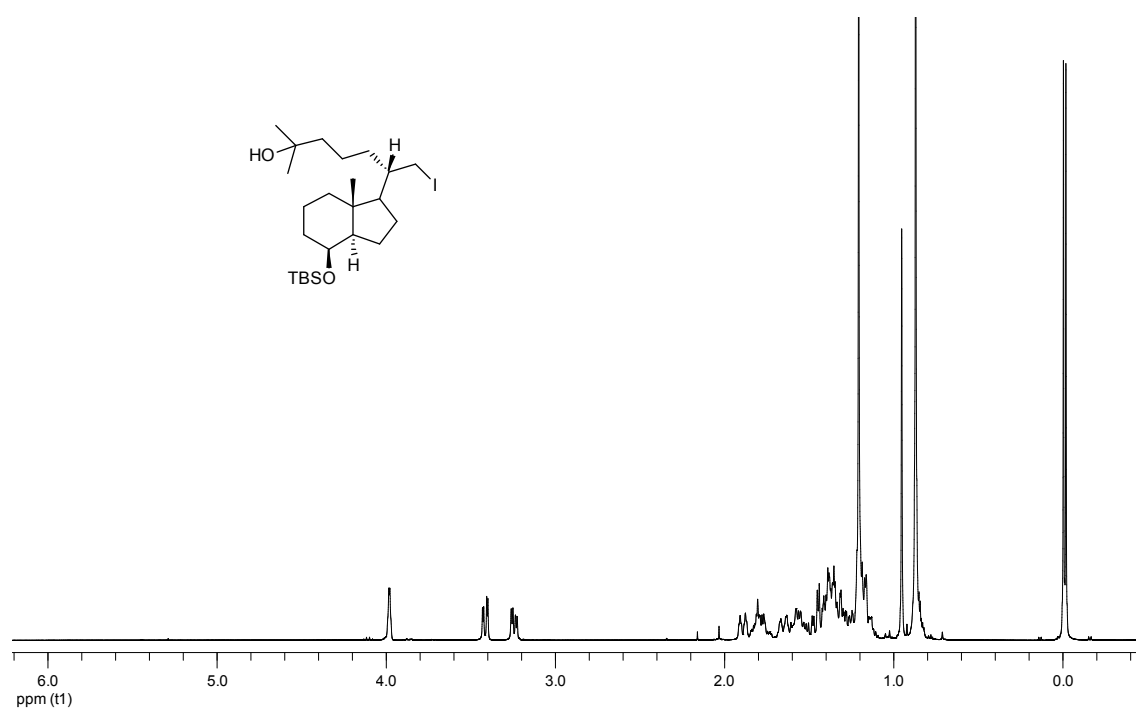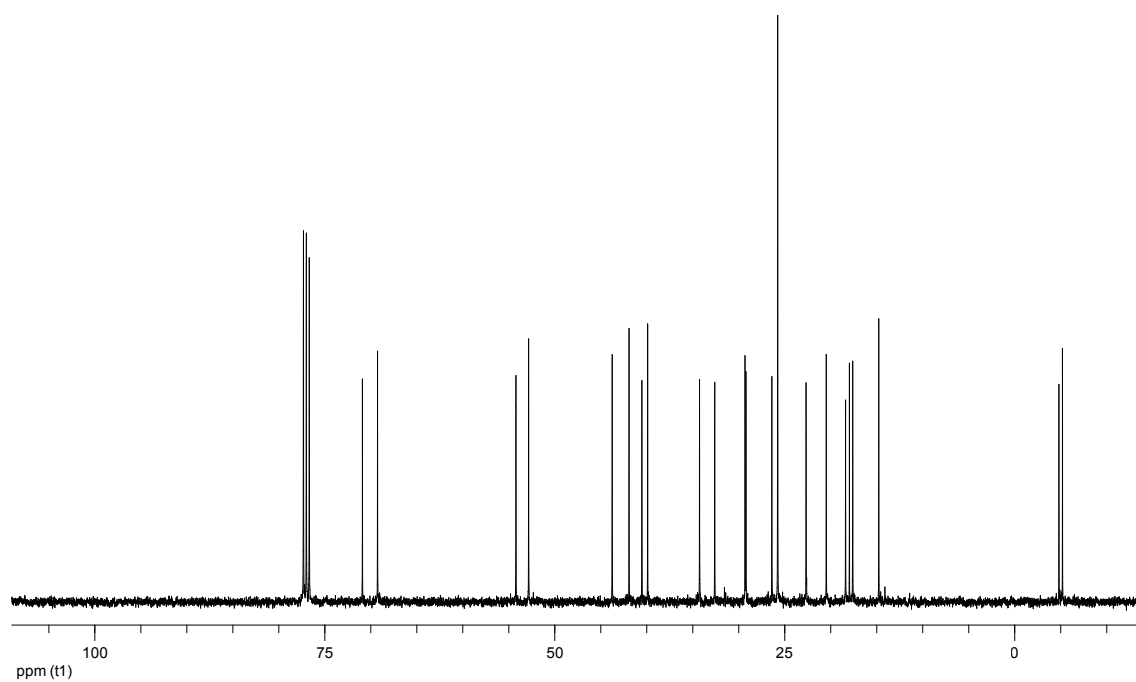

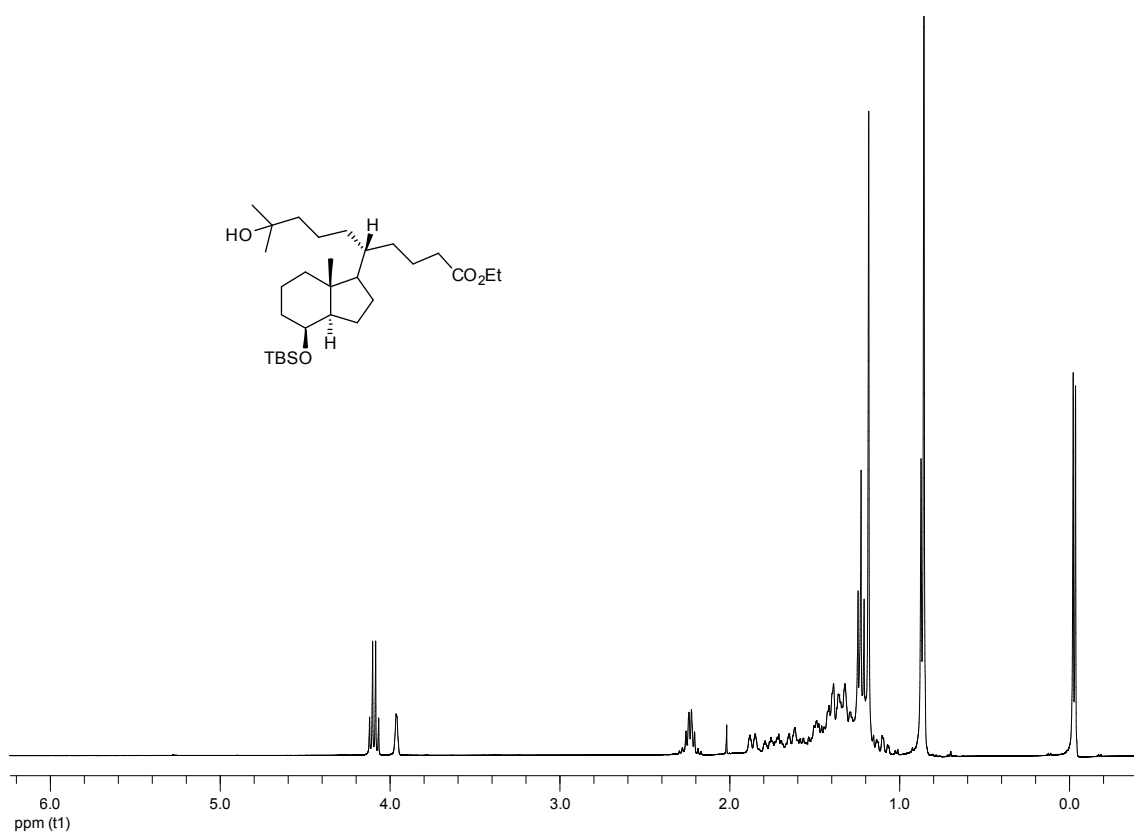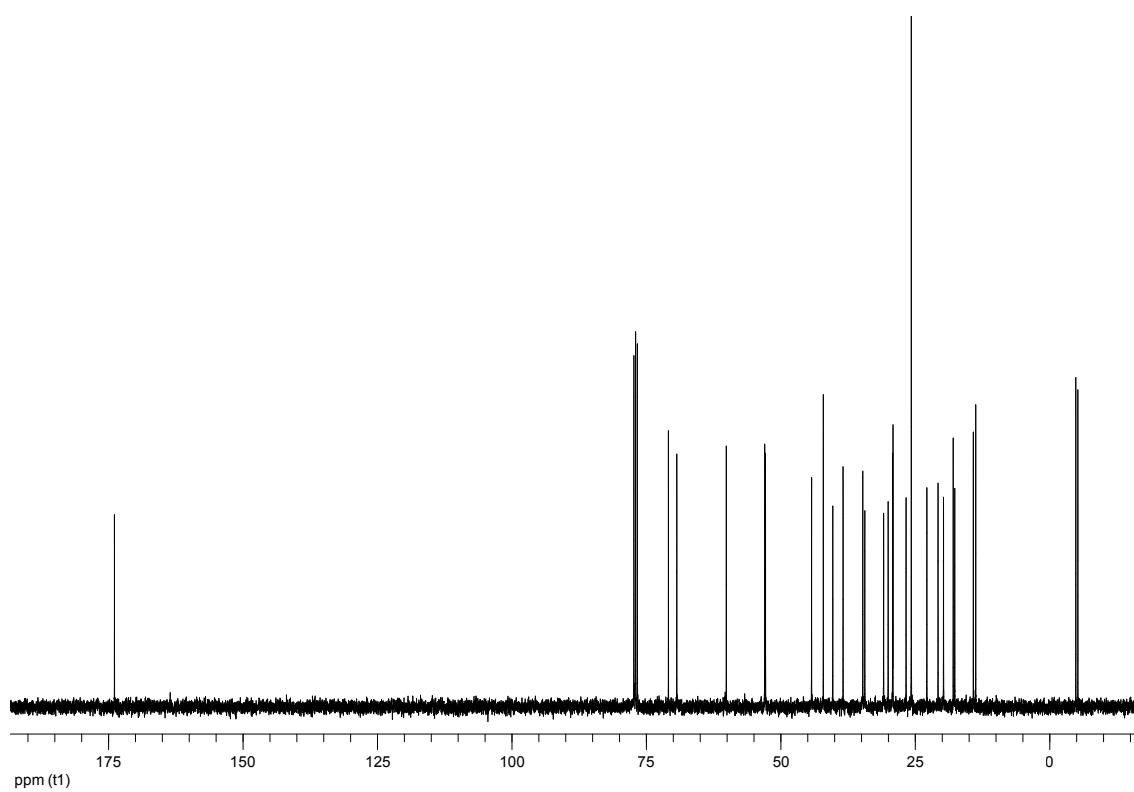

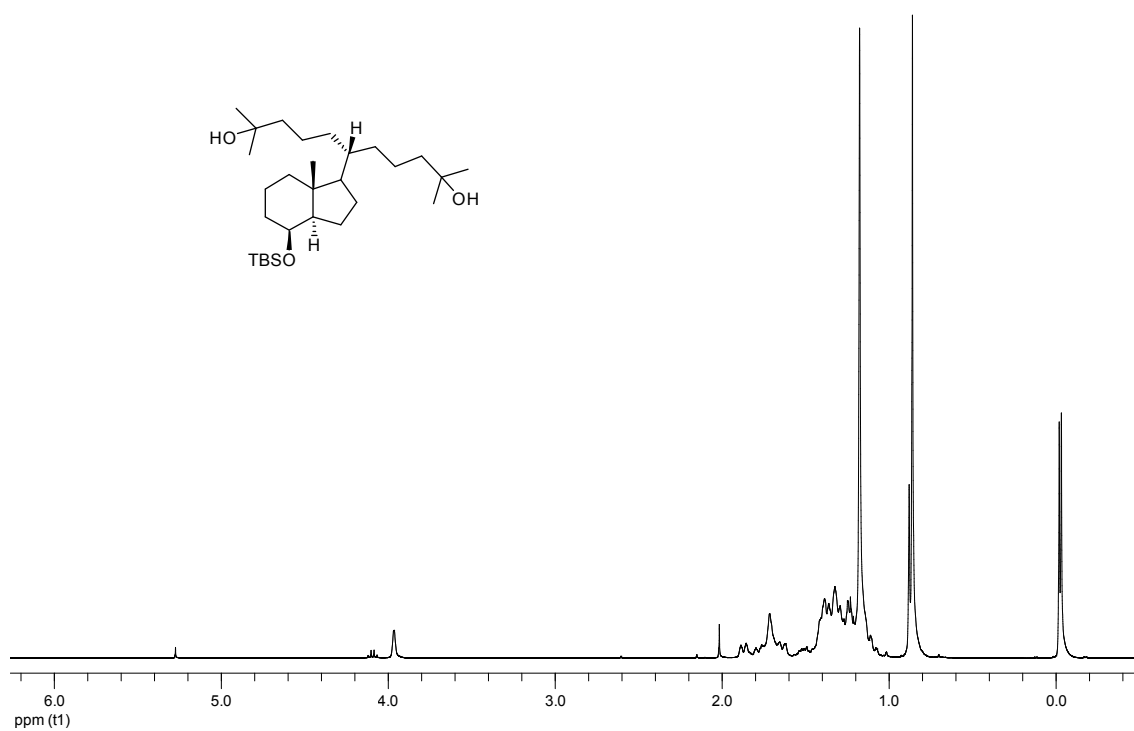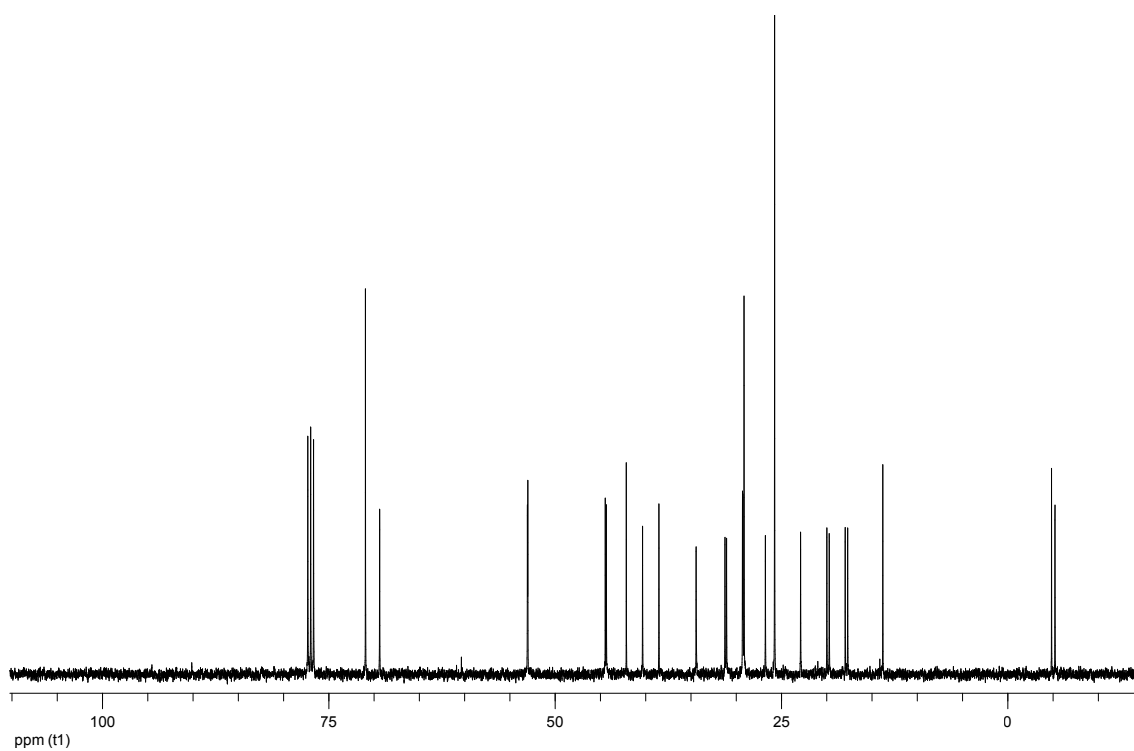

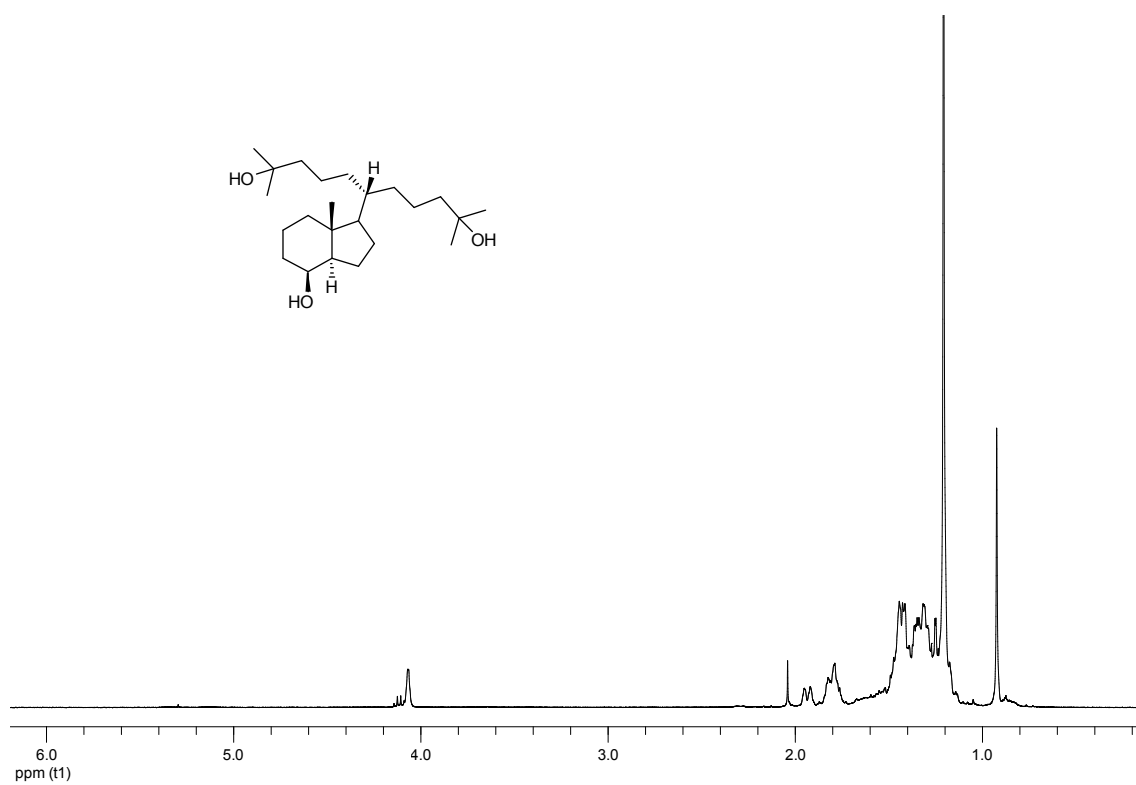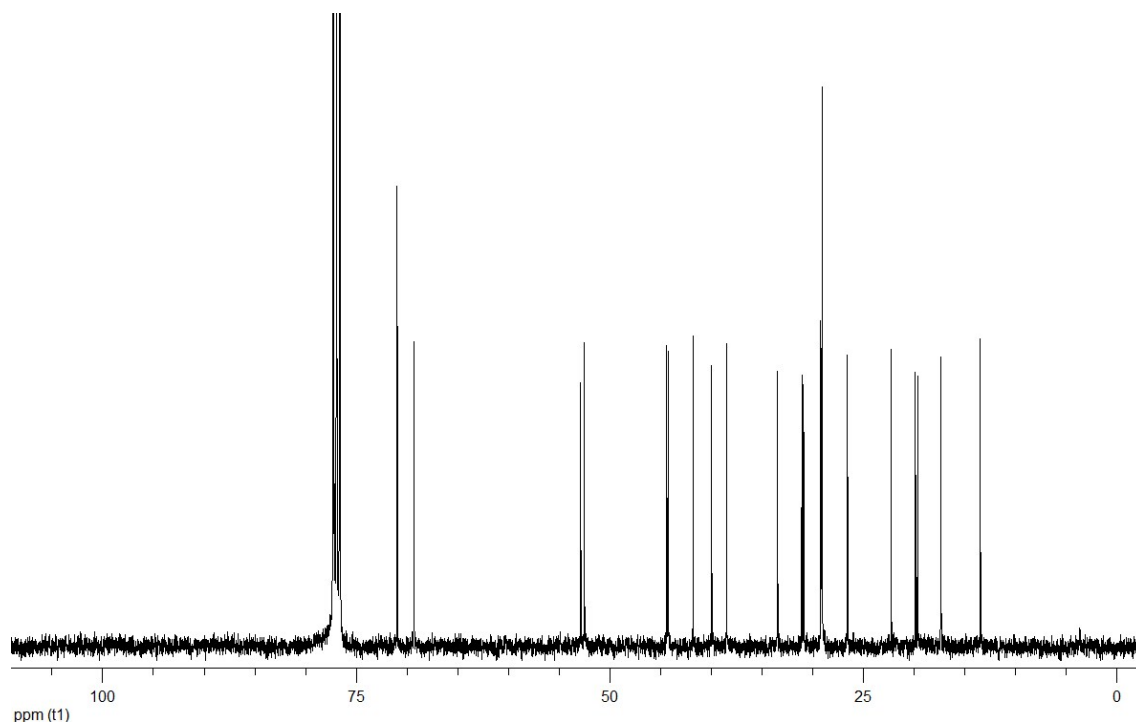

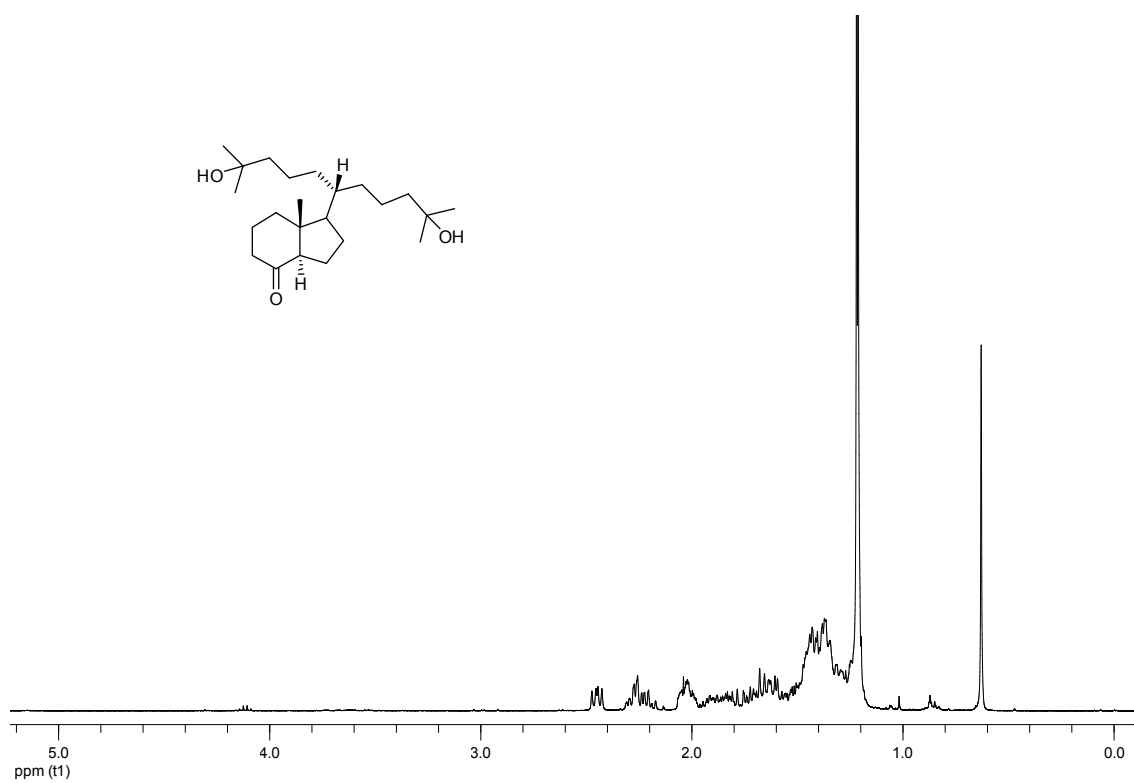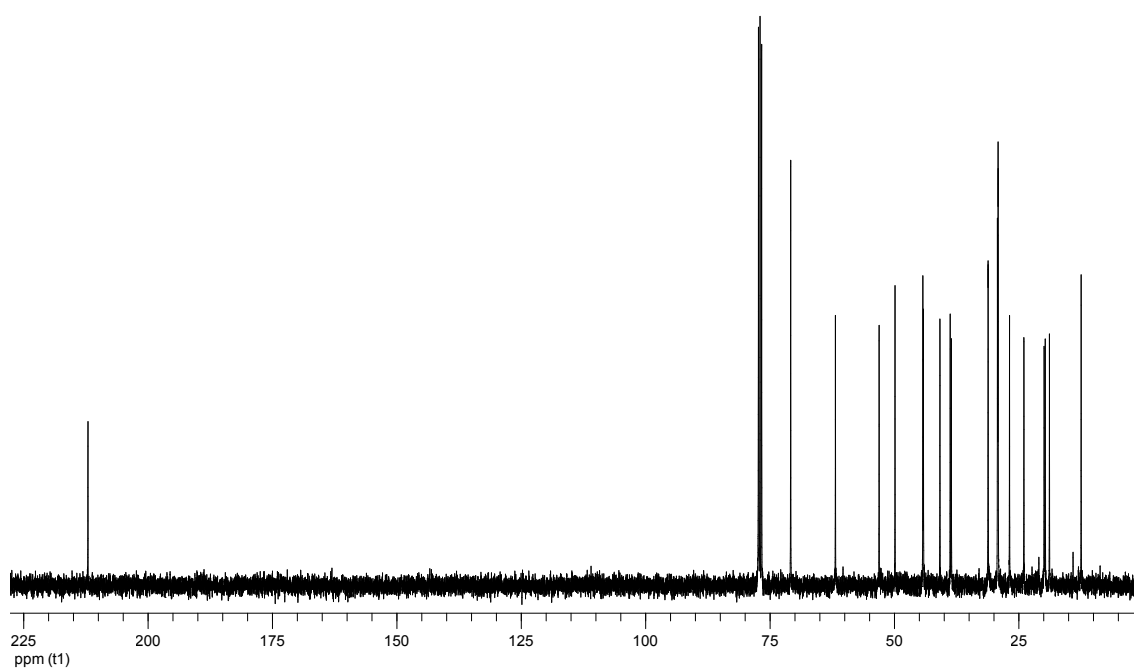



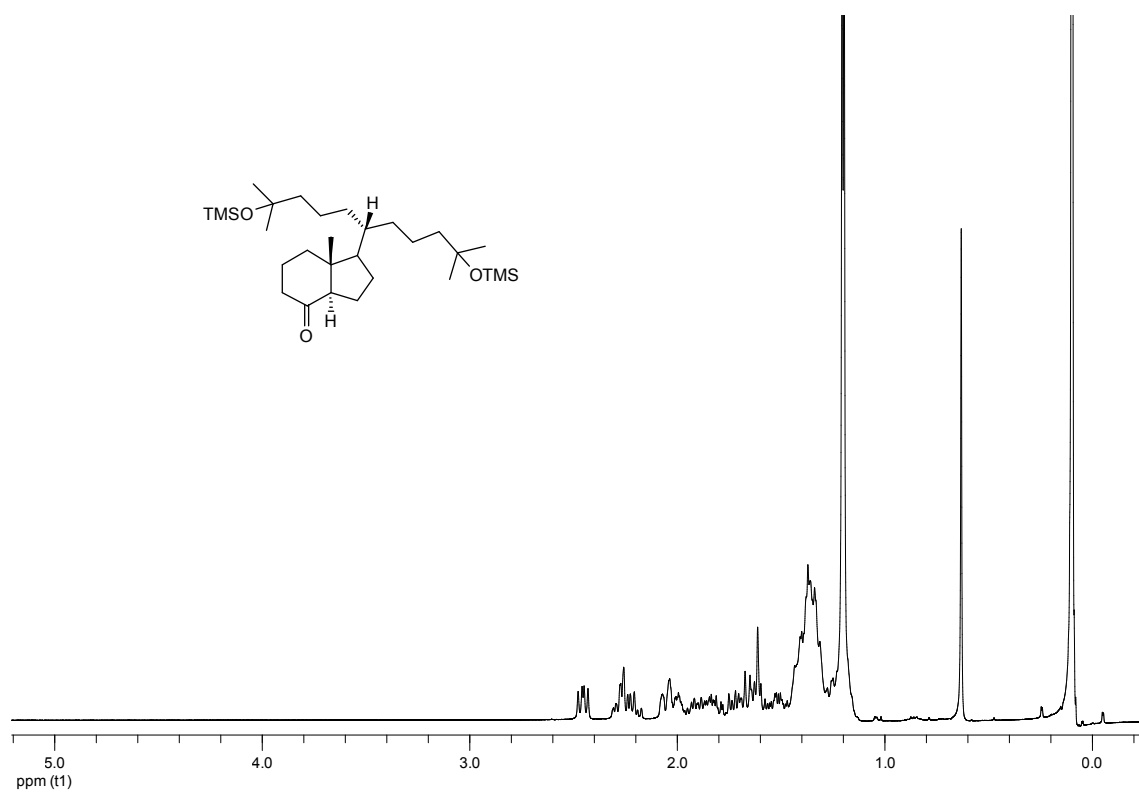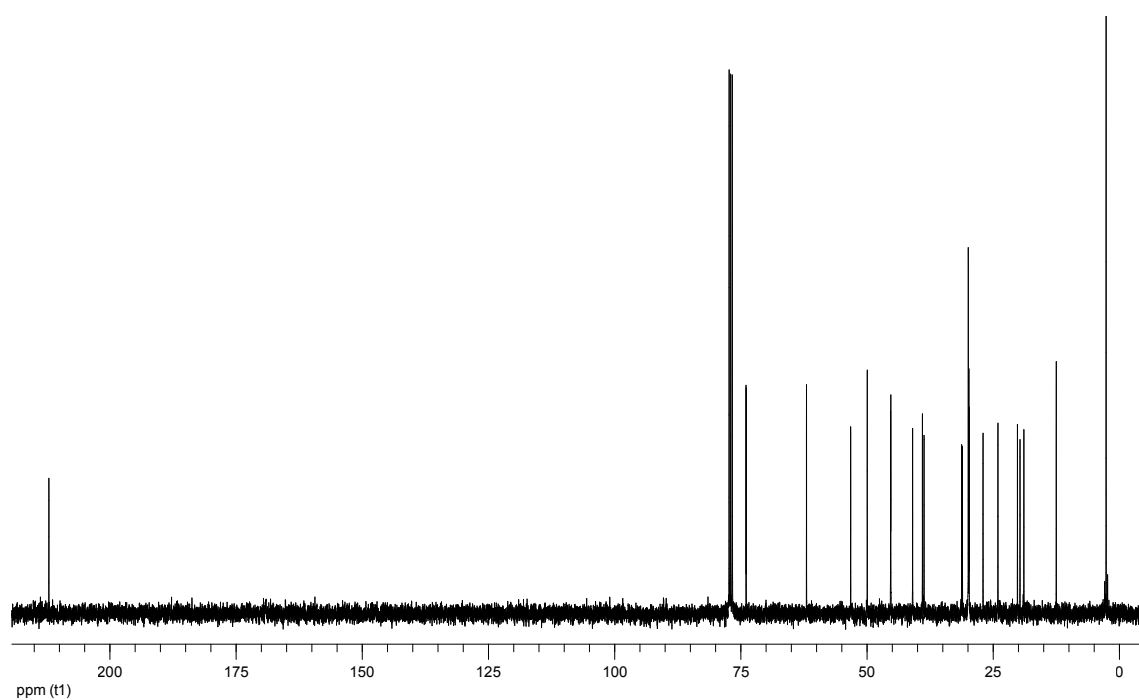

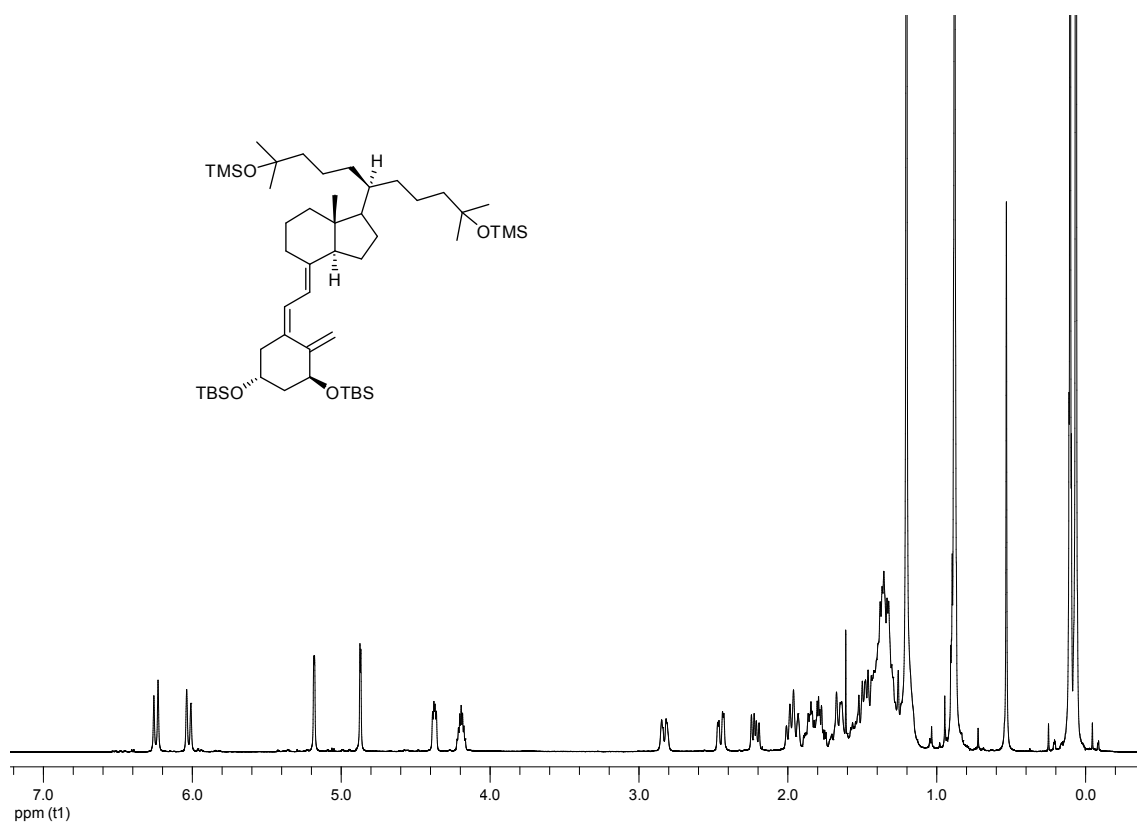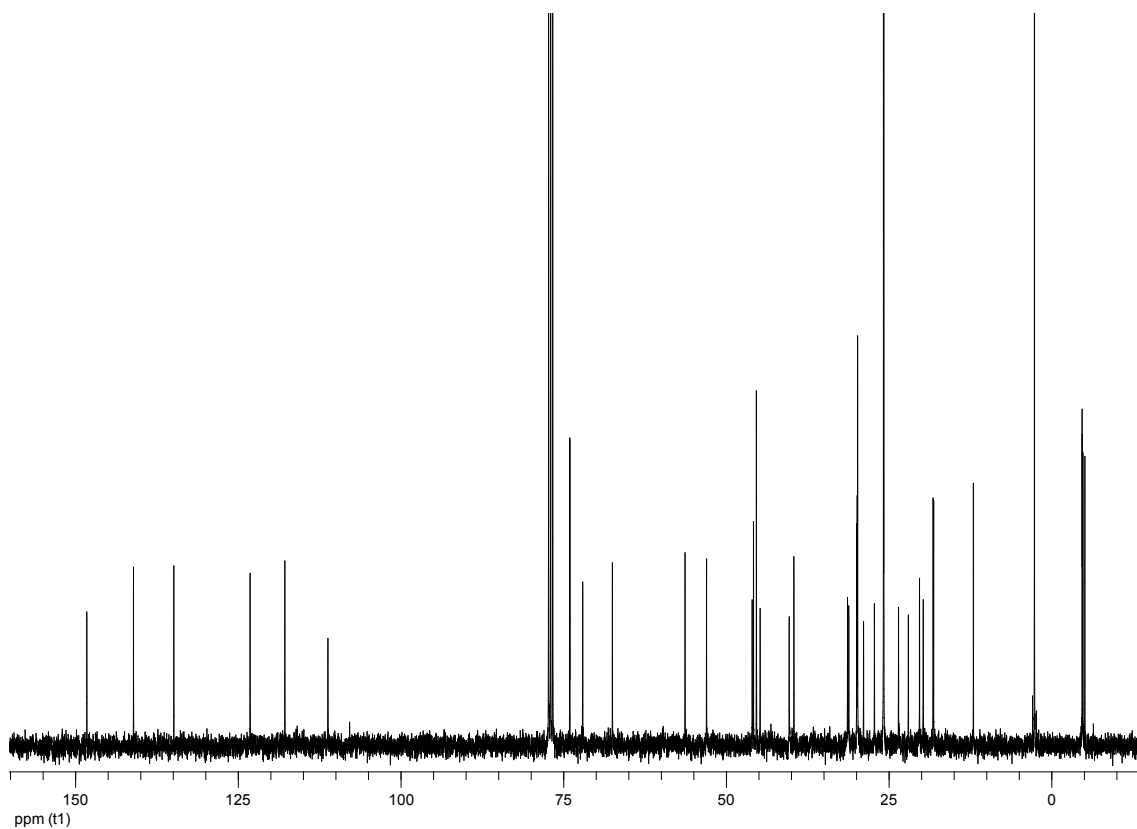

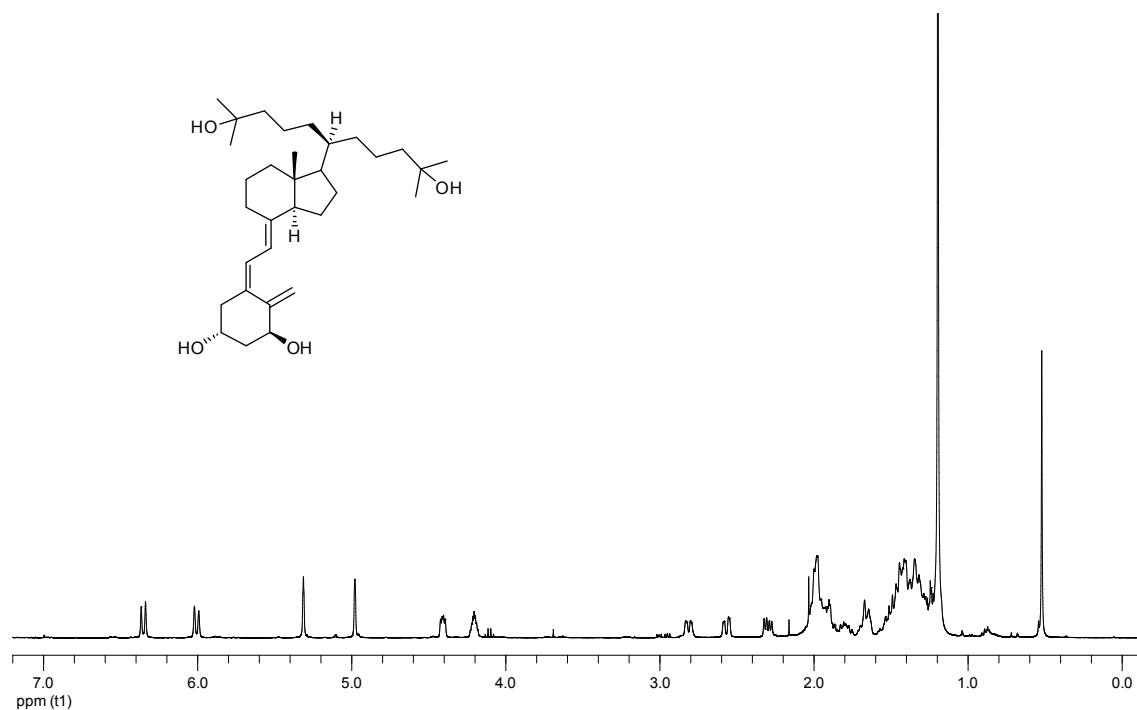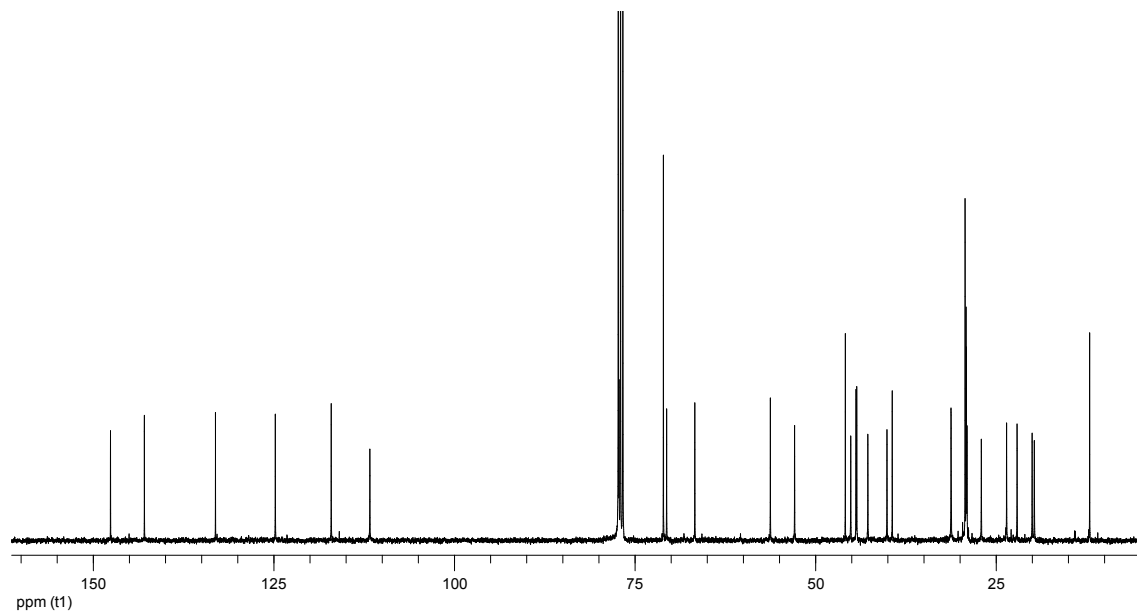

Supplement: c6ra08789b1.pdf [file c6ra08789b1.pdf]
